# Supplementary material for: Computational studies of the CuAAC reaction mechanism with diimine and phosphorus ligands for the synthesis of 1,4-disubstituted 1,2,3-triazoles
Source: Royal Society of Chemistry journal article supplement (doi:10.1039/d2nj06173b), 2023-01-01
Supplement: d2nj06173b1.pdf [file d2nj06173b1.pdf]

## Supporting Information for

### Computational Studies of CuAAC Reaction Mechanism with Diimine and Phosphorus Ligands for Synthesis of 1,4-Disubstituted 1,2,3-Triazoles

Mohammad Abd Al-Hakim Badawi<sup>1</sup>, Ali A Khairbek<sup>2</sup>, Renjith Thomas<sup>3</sup>.

<sup>1</sup> Prof. Dr. in Department of Chemistry, Faculty of Science, Tishreen University, Lattakia, Syrian Arab Republic. [badawihakim@gmail.com](mailto:badawihakim@gmail.com) [mohammadabdalhakimbadawi@tishreen.edu.sy](mailto:mohammadabdalhakimbadawi@tishreen.edu.sy).

<sup>2</sup> Ph. D. in Department of Chemistry, Faculty of Science, Tishreen University, Lattakia, Syrian Arab Republic. [alikhairbek@gmail.com](mailto:alikhairbek@gmail.com)

<sup>3</sup> Department of Chemistry, St Berchmans College (Autonomous), Mahatma Gandhi University, Changanassery, Kerala, India-686101. [renjith@sbcollege.ac.in](mailto:renjith@sbcollege.ac.in).

**Table S1. Calculated values of energies ( $E_o$ ) of catalytic cycle components,  $H_{corr}$ , and  $G_{corr}$  in the gas phase (in Hartree) for mononuclear CuAAC reaction path.**

| Compound     | MN12L <sup>a</sup> |              |            |              |              |            |
|--------------|--------------------|--------------|------------|--------------|--------------|------------|
|              | L1                 |              |            | L2           |              |            |
|              | $E_o$              | $H_{corr}$   | $G_{corr}$ | $E_o$        | $H_{corr}$   | $G_{corr}$ |
| (M-Ac)       | -2603.631952       | 0.495051     | 0.410803   | -2825.177701 | 0.424052     | 0.331486   |
| (M-RC)       | -3038.046952       | 0.639522     | 0.536186   | -3259.599272 | 0.568798     | 0.457636   |
| (M-TS1)      | -3038.032799       | 0.638148     | 0.538069   | -3259.583778 | 0.567024     | 0.460319   |
| (M-IC)       | -3038.052273       | 0.640111     | 0.541542   | -3259.603760 | 0.569001     | 0.463076   |
| (M-TS2)      | -3038.051537       | 0.639171     | 0.543222   | -3259.603709 | 0.567922     | 0.462678   |
| (M-P)        | -3038.150700       | 0.642653     | 0.546893   | -3259.701293 | 0.571556     | 0.469013   |
|              | L3                 |              |            | L4           |              |            |
|              | $E_o$              | $H_{corr}$   | $G_{corr}$ | $E_o$        | $H_{corr}$   | $G_{corr}$ |
|              | (M-Ac)             | -2912.801167 | 0.643551   | 0.553355     | -2982.370692 | 0.404788   |
| (M-RC)       | -3347.222464       | 0.788395     | 0.678705   | -3416.794211 | 0.550157     | 0.441161   |
| (M-TS)       | -3347.208717       | 0.786723     | 0.682371   | -3416.779467 | 0.548505     | 0.445613   |
| (M-IC)       | -3347.229114       | 0.788686     | 0.685215   | -3416.798745 | 0.550520     | 0.448789   |
| (M-TS2)      | -3347.226392       | 0.787807     | 0.686721   | -3416.794936 | 0.549503     | 0.448638   |
| (M-P)        | -3347.331171       | 0.790286     | 0.688897   | -3416.896303 | 0.553031     | 0.451938   |
|              | L5                 |              |            |              |              |            |
|              | $E_o$              | $H_{corr}$   | $G_{corr}$ |              |              |            |
|              | (M-Ac)             | -2751.132459 | 0.343566   | 0.262562     |              |            |
| (M-RC)       | -3185.557325       | 0.487775     | 0.387889   |              |              |            |
| (M-TS)       | -3185.541701       | 0.486321     | 0.392220   |              |              |            |
| (M-IC)       | -3185.557928       | 0.488142     | 0.394789   |              |              |            |
| (M-TS2)      | -3185.553437       | 0.487291     | 0.394936   |              |              |            |
| (M-P)        | -3185.654354       | 0.491095     | 0.399562   |              |              |            |
| <b>Azide</b> | -434.3929550       | 0.143198     | 0.099310   |              |              |            |

**Table S2. Calculated values of energies ( $E_o$ ) of catalytic cycle components,  $H_{\text{corr}}$ , and  $G_{\text{corr}}$  in the gas phase (in Hartree) for binuclear CuAAC reaction path.**

| Compound | MN12L <sup>a</sup> |                   |                   |                   |                   |                   |
|----------|--------------------|-------------------|-------------------|-------------------|-------------------|-------------------|
|          | L1                 |                   |                   | L2                |                   |                   |
|          | $E_o$              | $H_{\text{corr}}$ | $G_{\text{corr}}$ | $E_o$             | $H_{\text{corr}}$ | $G_{\text{corr}}$ |
| (B-Ac)   | -4899.860953       | 0.884019          | 0.765664          | -5342.978058      | 0.741659          | 0.610776          |
| (B-RC)   | -5334.278645       | 1.028763          | 0.887705          | -5777.393176      | 0.886874          | 0.734980          |
| (B-TS1)  | -5334.271176       | 1.026670          | 0.891215          | -5777.385299      | 0.884882          | 0.735503          |
| (B-IC)   | -5334.296129       | 1.029185          | 0.896820          | -5777.412335      | 0.887078          | 0.739715          |
| (B-TS2)  | -5334.295571       | 1.028233          | 0.895884          | -5777.408865      | 0.886228          | 0.740883          |
| (B-P)    | -5334.367533       | 1.031813          | 0.901621          | -5777.492150      | 0.889999          | 0.744021          |
|          | L3                 |                   |                   | L4                |                   |                   |
|          | $E_o$              | $H_{\text{corr}}$ | $G_{\text{corr}}$ | $E_o$             | $H_{\text{corr}}$ | $G_{\text{corr}}$ |
| (B-Ac)   | -5518.211799       | 1.181041          | 1.048018          | -5657.335335      | 0.704078          | 0.575101          |
| (B-RC)   | -5952.637023       | 1.326184          | 1.174911          | -6091.761742      | 0.848533          | 0.701610          |
| (B-TS)   | -5952.619077       | 1.324796          | 1.177844          | -6091.736784      | 0.847020          | 0.706050          |
| (B-IC)   | -5952.645938       | 1.327126          | 1.182386          | -6091.753653      | 0.848613          | 0.704523          |
| (B-TS2)  | -5952.643839       | 1.325285          | 1.179808          | -6091.753132      | 0.84784           | 0.705568          |
| (B-P)    | -5952.737332       | 1.329285          | 1.186154          | -6091.858580      | 0.851353          | 0.712653          |
|          | L5                 |                   |                   |                   |                   |                   |
|          | $E_o$              | $H_{\text{corr}}$ |                   | $G_{\text{corr}}$ |                   |                   |
| (B-Ac)   | -5194.833994       | 0.580560          |                   | 0.461299          |                   |                   |
| (B-RC)   | -5629.276847       | 0.724372          |                   | 0.592941          |                   |                   |
| (B-TS)   | -5629.251669       | 0.723162          |                   | 0.597256          |                   |                   |
| (B-IC)   | -5629.264202       | 0.724360          |                   | 0.594979          |                   |                   |
| (B-TS2)  | -5629.263838       | 0.723433          |                   | 0.596415          |                   |                   |
| (B-P)    | -5629.360521       | 0.727440          |                   | 0.601977          |                   |                   |

**Table S3. Calculated values of energies ( $E_o$ ) of catalytic cycle components, presence of toluene and water as solvent (in Hartree) for mononuclear CuAAC reaction path.**

| Compound | toluene      |              |              |              |              |
|----------|--------------|--------------|--------------|--------------|--------------|
|          | L1           | L2           | L3           | L4           | L5           |
| (M-Ac)   | -2603.641309 | -2825.190327 | -2912.810609 | -2982.381201 | -2751.142478 |
| (M-RC)   | -3038.057596 | -3259.613220 | -3347.233149 | -3416.805740 | -3185.566777 |
| (M-TS1)  | -3038.041326 | -3259.595552 | -3347.217485 | -3416.788162 | -3185.548348 |
| (M-IC)   | -3038.061490 | -3259.616357 | -3347.238146 | -3416.807928 | -3185.565299 |
| (M-TS2)  | -3038.060467 | -3259.616409 | -3347.235368 | -3416.804904 | -3185.562036 |
| (M-P)    | -3038.162210 | -3259.716064 | -3347.342663 | -3416.908549 | -3185.666354 |
|          | water        |              |              |              |              |
|          | L1           | L2           | L3           | L4           | L5           |
| (M-Ac)   | -2603.650445 | -2825.202007 | -2912.819620 | -2982.389876 | -2751.150779 |
| (M-RC)   | -3038.067843 | -3259.626204 | -3347.243473 | -3416.815736 | -3185.574688 |
| (M-TS1)  | -3038.049680 | -3259.606610 | -3347.226006 | -3416.795636 | -3185.553889 |
| (M-IC)   | -3038.070442 | -3259.628106 | -3347.246835 | -3416.815777 | -3185.571535 |
| (M-TS2)  | -3038.049680 | -3259.628247 | -3347.244014 | -3416.813426 | -3185.569372 |
| (M-P)    | -3038.173124 | -3259.729491 | -3347.353478 | -3416.919012 | -3185.676700 |

**Table S4. Calculated values of energies ( $E_o$ ) of catalytic cycle components, presence of toluene and water as solvent (in Hartree) for binuclear CuAAC reaction path.**

| Compound | toluene      |              |             |              |              |
|----------|--------------|--------------|-------------|--------------|--------------|
|          | L1           | L2           | L3          | L4           | L5           |
| (M-Ac)   | -4899.891221 | -5343.010444 | -5518.23996 | -5657.364823 | -5194.865065 |
| (M-RC)   | -5334.309037 | -5777.425088 | -5952.66612 | -6091.791534 | -5629.308288 |
| (M-TS1)  | -5334.301573 | -5777.418093 | -5952.64765 | -6091.765810 | -5629.283097 |
| (M-IC)   | -5334.328819 | -5777.447379 | -5952.67735 | -6091.783506 | -5629.296918 |
| (M-TS2)  | -5334.328819 | -5777.444128 | -5952.67553 | -6091.783199 | -5629.296968 |
| (M-P)    | -5334.401076 | -5777.527616 | -5952.76938 | -6091.891201 | -5629.395447 |
| Compound | water        |              |             |              |              |
|          | L1           | L2           | L3          | L42          | L5           |
| (M-Ac)   | -4899.914106 | -5343.03526  | -5518.26128 | -5657.38651  | -5194.88776  |
| (M-RC)   | -5334.332519 | -5777.44947  | -5952.68871 | -6091.81337  | -5629.33133  |
| (M-TS1)  | -5334.324846 | -5777.44342  | -5952.66950 | -6091.78706  | -5629.30622  |
| (M-IC)   | -5334.354670 | -5777.47520  | -5952.70221 | -6091.80565  | -5629.32144  |
| (M-TS2)  | -5334.354772 | -5777.47198  | -5952.70058 | -6091.80557  | -5629.32186  |
| (M-P)    | -5334.427292 | -5777.55541  | -5952.79457 | -6091.91590  | -5629.42174  |

**Table S5: Calculated Gibbs Free Energies in the gas phase and the presence of toluene or water as a solvent for uncatalyzed pathway (in kcal/mol).**

|                               | 1-4   |         |       | 1-5   |         |       |
|-------------------------------|-------|---------|-------|-------|---------|-------|
|                               | Gas   | Toluene | Water | Gas   | Toluene | Water |
| $\Delta_r G^\circ$ (reagents) | 0.0   | 0.0     | 0.0   | 0.0   | 0.0     | 0.0   |
| $\Delta G^\ddagger$ (TS)      | 32.3  | 32.9    | 33.3  | 30.6  | 31.5    | 32.3  |
| $\Delta_r G^\circ$ (P)        | -62.1 | -62.7   | -63.5 | -59.8 | -60.2   | -60.6 |

**Table S6. Calculated values of energies ( $E_o$ ) in the presence of toluene and water as a solvent for uncatalyzed cycle components,  $H_{\text{corr}}$ , and  $G_{\text{corr}}$  in the gas phase (in Hartree).**

| Compound | MN12L           |               |             |                   |                   |
|----------|-----------------|---------------|-------------|-------------------|-------------------|
|          | $E_o$ gas phase | $E_o$ toluene | $E_o$ water | $H_{\text{corr}}$ | $G_{\text{corr}}$ |
| Azide    | -434.392955     | -434.396191   | -434.398722 | 0.143198          | 0.099310          |
| alkyne   | -307.868657     | -307.871284   | -307.873359 | 0.117950          | 0.080250          |
| 1,4-TS   | -742.231141     | -742.236017   | -742.240038 | 0.261346          | 0.200499          |
| 1,5-TS   | -742.234612     | -742.238895   | -742.242335 | 0.261262          | 0.201247          |
| 1,4-P    | -742.389283     | -742.396116   | -742.401878 | 0.267302          | 0.208233          |
| 1,5-P    | -742.387732     | -742.394211   | -742.399565 | 0.267447          | 0.210414          |

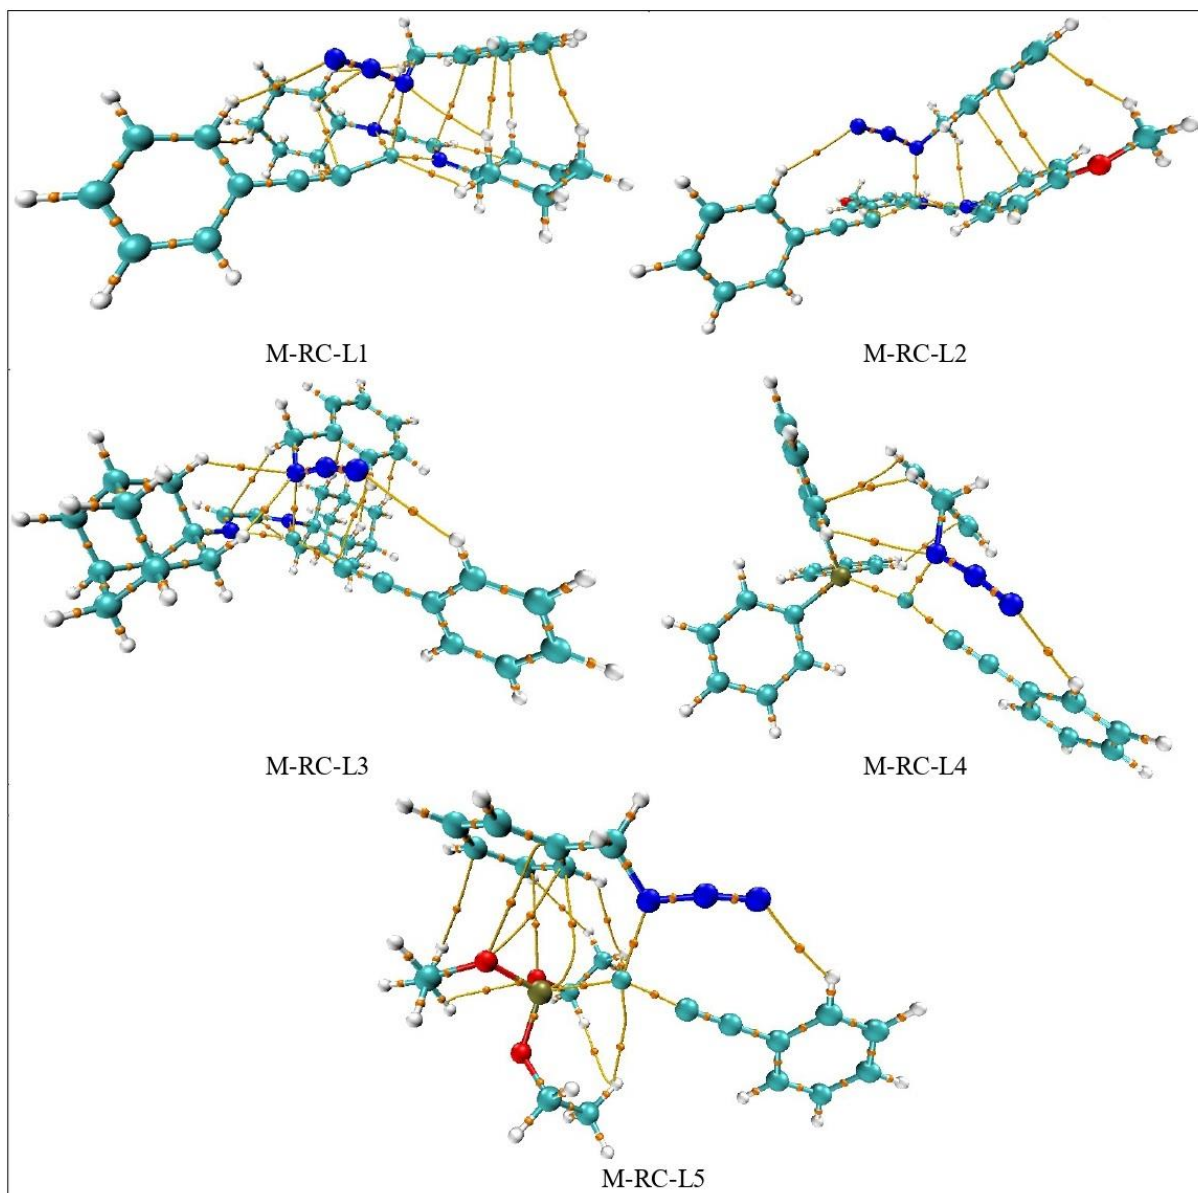

. Fig. S1. AIM of RC (reactive complexes) in the mononuclear pathway calculated at MN12L.

## MN12L Optimized Cartesian Coordinates for mononuclear catalytic cycle components

|              |              |              |              |              |              |              |              |
|--------------|--------------|--------------|--------------|--------------|--------------|--------------|--------------|
| <b>Azide</b> |              |              |              | 6            | 3.466503000  | -2.926948000 | -0.012927000 |
| 7            | 2.679814000  | 1.130672000  | 1.175397000  | 1            | 3.600978000  | -1.829341000 | -0.053196000 |
| 7            | 2.272638000  | -0.338471000 | -0.613110000 | 1            | 4.475816000  | -3.367907000 | 0.009380000  |
| 7            | 2.427365000  | 0.396209000  | 0.354994000  | 6            | -3.825935000 | 0.211684000  | 0.063265000  |
| 6            | -0.191276000 | -0.566889000 | -0.293159000 | 1            | -3.757258000 | 0.613594000  | 2.189676000  |
| 6            | -1.177301000 | -1.229108000 | 0.440646000  | 1            | -4.811531000 | -0.301336000 | 0.115203000  |
| 6            | -0.455186000 | 0.717625000  | -0.777489000 | 6            | -3.691733000 | 1.174163000  | 1.242623000  |
| 6            | -2.409428000 | -0.627434000 | 0.676936000  | 1            | -2.670690000 | 1.603199000  | 1.199995000  |
| 1            | -0.972529000 | -2.229930000 | 0.835808000  | 1            | -3.820341000 | 0.281990000  | -2.101602000 |
| 6            | -1.684245000 | 1.322020000  | -0.535867000 | 6            | -3.726916000 | 0.980917000  | -1.254050000 |
| 1            | 0.314370000  | 1.245148000  | -1.350771000 | 1            | -2.705754000 | 1.410910000  | -1.309363000 |
| 6            | -2.665367000 | 0.650902000  | 0.189489000  | 6            | -4.769727000 | 2.086414000  | -1.323287000 |
| 1            | -3.171351000 | -1.156949000 | 1.255347000  | 1            | -4.677689000 | 2.627694000  | -2.278137000 |
| 1            | -1.878183000 | 2.327967000  | -0.917956000 | 1            | -5.781962000 | 1.638256000  | -1.322241000 |
| 1            | -3.629829000 | 1.128681000  | 0.380834000  | 6            | -4.736446000 | 2.277120000  | 1.172194000  |
| 6            | 1.127626000  | -1.242734000 | -0.571945000 | 1            | -4.620932000 | 2.957620000  | 2.030485000  |
| 1            | 1.114778000  | -1.728347000 | -1.560052000 | 1            | -5.747566000 | 1.836151000  | 1.266162000  |
| 1            | 1.295078000  | -2.051739000 | 0.164155000  | 6            | -4.638587000 | 3.037574000  | -0.142585000 |
| <b>Ac-L1</b> |              |              |              | 1            | -3.658682000 | 3.547375000  | -0.194598000 |
| 7            | -2.757753000 | -0.761143000 | 0.117372000  | 1            | -5.403068000 | 3.829046000  | -0.193667000 |
| 29           | -0.874492000 | -0.241310000 | -0.045417000 | <b>RC-L1</b> |              |              |              |
| 6            | -2.999855000 | -2.018053000 | 0.205669000  | 7            | 1.751982000  | 0.009268000  | -1.552697000 |
| 7            | -0.720583000 | -2.385853000 | -0.049470000 | 29           | -0.006921000 | -0.350455000 | -0.772282000 |
| 6            | -1.849576000 | -2.919150000 | 0.208612000  | 6            | 1.997300000  | 1.251407000  | -1.809701000 |
| 1            | -4.026406000 | -2.409025000 | 0.283133000  | 7            | -0.128382000 | 1.768785000  | -1.006755000 |
| 1            | -1.979078000 | -3.992021000 | 0.433076000  | 6            | 0.896287000  | 2.185923000  | -1.655775000 |
| 6            | 0.641457000  | 0.799711000  | -0.029289000 | 1            | 2.972574000  | 1.607463000  | -2.168400000 |
| 6            | 1.727808000  | 1.389740000  | -0.018975000 | 1            | 0.954524000  | 3.190518000  | -2.110763000 |
| 6            | 2.960852000  | 2.088915000  | -0.003376000 | 6            | -1.672449000 | -1.145286000 | -0.558927000 |
| 6            | 3.518091000  | 2.551806000  | 1.206596000  | 6            | -2.835075000 | -1.430152000 | -0.251035000 |
| 6            | 3.670798000  | 2.343492000  | -1.194893000 | 6            | -4.173933000 | -1.698201000 | 0.132310000  |
| 6            | 4.727161000  | 3.233179000  | 1.219510000  | 6            | -4.724768000 | -1.063632000 | 1.265751000  |
| 6            | 4.877412000  | 3.029212000  | -1.172435000 | 6            | -4.997988000 | -2.576712000 | -0.598578000 |
| 6            | 5.415504000  | 3.477765000  | 0.032466000  | 6            | -6.039283000 | -1.297093000 | 1.645016000  |
| 1            | 2.976600000  | 2.363566000  | 2.137475000  | 6            | -6.312263000 | -2.803935000 | -0.212526000 |
| 1            | 3.249214000  | 1.992170000  | -2.140431000 | 6            | -6.841676000 | -2.167749000 | 0.908890000  |
| 1            | 5.139196000  | 3.581821000  | 2.171157000  | 1            | -4.084905000 | -0.385603000 | 1.841904000  |
| 1            | 5.408206000  | 3.216743000  | -2.110537000 | 1            | -4.582050000 | -3.076009000 | -1.477615000 |
| 1            | 6.366549000  | 4.016606000  | 0.046202000  | 1            | -6.444863000 | -0.795022000 | 2.528326000  |
| 6            | 0.522839000  | -3.102894000 | -0.018775000 | 1            | -6.934910000 | -3.489682000 | -0.794729000 |
| 1            | 0.749646000  | -3.079449000 | -2.171461000 | 1            | -7.876660000 | -2.351169000 | 1.209611000  |
| 1            | 0.345733000  | -4.201922000 | 0.038175000  | 7            | -1.370657000 | -0.584641000 | 2.685463000  |
| 6            | 1.315415000  | -2.761316000 | -1.280280000 | 7            | -0.421223000 | -0.249382000 | 2.178552000  |
| 1            | 1.390321000  | -1.656180000 | -1.322900000 | 7            | 0.577897000  | -0.008554000 | 1.496750000  |
| 1            | 0.730853000  | -2.916005000 | 2.131069000  | 6            | 1.321608000  | 1.201864000  | 1.850326000  |
| 6            | 1.305980000  | -2.661248000 | 1.224814000  | 1            | 1.025718000  | 2.021596000  | 1.171859000  |
| 1            | 1.385533000  | -1.557117000 | 1.190783000  | 1            | 1.051588000  | 1.526058000  | 2.873469000  |
| 6            | 2.692304000  | -3.285204000 | 1.247269000  | 6            | 2.808930000  | 1.004973000  | 1.765981000  |
| 1            | 3.231996000  | -2.954590000 | 2.148957000  | 6            | 3.422680000  | -0.136022000 | 2.287957000  |
| 1            | 2.606171000  | -4.386483000 | 1.326084000  | 6            | 3.608354000  | 2.021595000  | 1.237201000  |
| 6            | 2.703490000  | -3.379677000 | -1.249206000 | 6            | 4.809844000  | -0.249241000 | 2.293795000  |
| 1            | 3.250772000  | -3.117487000 | -2.168480000 | 6            | 4.996148000  | 1.913286000  | 1.248204000  |
| 1            | 2.620958000  | -4.484149000 | -1.246260000 | 6            | 5.600643000  | 0.776469000  | 1.778961000  |

|               |              |              |              |              |              |              |              |
|---------------|--------------|--------------|--------------|--------------|--------------|--------------|--------------|
| 1             | 2.799029000  | -0.939459000 | 2.694658000  | 1            | -4.133527000 | -1.512444000 | -2.098868000 |
| 1             | 3.128530000  | 2.913749000  | 0.817246000  | 1            | -5.255281000 | -4.453973000 | 1.738519000  |
| 1             | 5.279844000  | -1.143754000 | 2.712725000  | 1            | -6.213446000 | -2.868918000 | -2.147934000 |
| 1             | 5.609575000  | 2.719202000  | 0.836143000  | 1            | -6.786896000 | -4.345926000 | -0.221210000 |
| 1             | 6.690272000  | 0.688189000  | 1.791053000  | 7            | -1.775108000 | -1.168768000 | 1.715792000  |
| 6             | -1.339647000 | 2.537140000  | -0.881213000 | 7            | -0.793551000 | -0.564912000 | 1.960025000  |
| 1             | -1.881585000 | 2.315681000  | -2.965071000 | 7            | 0.122098000  | 0.057299000  | 1.321701000  |
| 1             | -1.127557000 | 3.623050000  | -1.016600000 | 6            | 1.122483000  | 0.725747000  | 2.118430000  |
| 6             | -2.321991000 | 2.098961000  | -1.976677000 | 1            | 1.272704000  | 1.738171000  | 1.691534000  |
| 1             | -2.430253000 | 1.000507000  | -1.903083000 | 1            | 0.752502000  | 0.877263000  | 3.149414000  |
| 1             | -1.239119000 | 2.624161000  | 1.283654000  | 6            | 2.450548000  | 0.011095000  | 2.148877000  |
| 6             | -1.943253000 | 2.287959000  | 0.500447000  | 6            | 2.541798000  | -1.355778000 | 1.878718000  |
| 1             | -2.061618000 | 1.190232000  | 0.605049000  | 6            | 3.614114000  | 0.715635000  | 2.472194000  |
| 6             | -3.301748000 | 2.952192000  | 0.657258000  | 6            | 3.775061000  | -2.002389000 | 1.926885000  |
| 1             | -3.708654000 | 2.742560000  | 1.659749000  | 6            | 4.845586000  | 0.071145000  | 2.520075000  |
| 1             | -3.195530000 | 4.053025000  | 0.592465000  | 6            | 4.930929000  | -1.292304000 | 2.241645000  |
| 6             | -3.675632000 | 2.768856000  | -1.804343000 | 1            | 1.635918000  | -1.913262000 | 1.620415000  |
| 1             | -4.359113000 | 2.431360000  | -2.599763000 | 1            | 3.550657000  | 1.789417000  | 2.681643000  |
| 1             | -3.572999000 | 3.864690000  | -1.929617000 | 1            | 3.832520000  | -3.074479000 | 1.715891000  |
| 6             | -4.252237000 | 2.469085000  | -0.428427000 | 1            | 5.747546000  | 0.636414000  | 2.771264000  |
| 1             | -4.391081000 | 1.374450000  | -0.325469000 | 1            | 5.897968000  | -1.801492000 | 2.277218000  |
| 1             | -5.247867000 | 2.925840000  | -0.311391000 | 6            | -1.475754000 | 3.131230000  | -0.183150000 |
| 6             | 2.761992000  | -1.033412000 | -1.680179000 | 1            | -2.181766000 | 3.371736000  | -2.219686000 |
| 1             | 4.464761000  | 0.181568000  | -2.299440000 | 1            | -1.288037000 | 4.221629000  | -0.038160000 |
| 1             | 2.628597000  | -1.458991000 | -2.699301000 | 6            | -2.543784000 | 2.949073000  | -1.267631000 |
| 6             | 4.204999000  | -0.565885000 | -1.531924000 | 1            | -2.661359000 | 1.859024000  | -1.425450000 |
| 1             | 4.299602000  | -0.065552000 | -0.549020000 | 1            | -1.203752000 | 2.595118000  | 1.902026000  |
| 1             | 1.398704000  | -2.477847000 | -0.839185000 | 6            | -1.982730000 | 2.520343000  | 1.122777000  |
| 6             | 2.439331000  | -2.141543000 | -0.682286000 | 1            | -2.152558000 | 1.441987000  | 0.935442000  |
| 1             | 2.471603000  | -1.702663000 | 0.333365000  | 6            | -3.285326000 | 3.172721000  | 1.557288000  |
| 6             | 3.421595000  | -3.296852000 | -0.786296000 | 1            | -3.623492000 | 2.738338000  | 2.511190000  |
| 1             | 3.165562000  | -4.077848000 | -0.053229000 | 1            | -3.119218000 | 4.250471000  | 1.750154000  |
| 1             | 3.326681000  | -3.770233000 | -1.782526000 | 6            | -3.861911000 | 3.579416000  | -0.844481000 |
| 6             | 5.180925000  | -1.732718000 | -1.615472000 | 1            | -4.615820000 | 3.435943000  | -1.635063000 |
| 1             | 6.211973000  | -1.366228000 | -1.484211000 | 1            | -3.730051000 | 4.674119000  | -0.743057000 |
| 1             | 5.139968000  | -2.170579000 | -2.631521000 | 6            | -4.347003000 | 3.006175000  | 0.479374000  |
| 6             | 4.849927000  | -2.810521000 | -0.595653000 | 1            | -4.560871000 | 1.928529000  | 0.351238000  |
| 1             | 4.955406000  | -2.387470000 | 0.421850000  | 1            | -5.294545000 | 3.478373000  | 0.784491000  |
| 1             | 5.565913000  | -3.645458000 | -0.663709000 | 6            | 2.818923000  | 0.144940000  | -1.924179000 |
| <b>TS1-L1</b> |              |              |              | 1            | 4.451545000  | 1.322262000  | -1.100901000 |
| 7             | 1.760211000  | 0.983835000  | -1.368525000 | 1            | 3.012315000  | 0.489520000  | -2.964091000 |
| 29            | 0.059559000  | 0.306562000  | -0.643479000 | 6            | 4.122049000  | 0.269364000  | -1.135026000 |
| 6             | 1.889628000  | 2.265064000  | -1.414647000 | 1            | 3.918637000  | -0.035214000 | -0.094366000 |
| 7             | -0.281885000 | 2.457206000  | -0.603081000 | 1            | 1.412485000  | -1.382103000 | -2.519114000 |
| 6             | 0.779868000  | 3.078810000  | -0.945699000 | 6            | 2.364632000  | -1.305735000 | -1.967652000 |
| 1             | 2.783903000  | 2.743991000  | -1.843550000 | 1            | 2.141047000  | -1.615313000 | -0.926138000 |
| 1             | 0.866538000  | 4.179956000  | -0.928990000 | 6            | 3.442829000  | -2.198127000 | -2.562260000 |
| 6             | -1.417207000 | -0.768595000 | -0.806871000 | 1            | 3.098515000  | -3.243806000 | -2.590091000 |
| 6             | -2.317454000 | -1.419626000 | -0.196201000 | 1            | 3.618215000  | -1.907450000 | -3.616348000 |
| 6             | -3.514367000 | -2.212052000 | -0.154259000 | 6            | 5.203656000  | -0.623315000 | -1.724550000 |
| 6             | -3.848264000 | -3.049557000 | 0.922615000  | 1            | 6.127916000  | -0.528724000 | -1.130843000 |
| 6             | -4.389276000 | -2.163126000 | -1.257836000 | 1            | 5.455272000  | -0.277417000 | -2.746021000 |
| 6             | -5.014072000 | -3.805632000 | 0.891142000  | 6            | 4.743762000  | -2.073246000 | -1.782171000 |
| 6             | -5.549620000 | -2.922990000 | -1.280254000 | 1            | 4.581051000  | -2.435935000 | -0.749445000 |
| 6             | -5.871392000 | -3.748591000 | -0.204204000 | 1            | 5.527721000  | -2.713252000 | -2.218224000 |
| 1             | -3.180150000 | -3.103643000 | 1.782932000  | <b>IC-L1</b> |              |              |              |

|    |              |              |              |               |              |              |              |
|----|--------------|--------------|--------------|---------------|--------------|--------------|--------------|
| 7  | 1.756749000  | 1.025926000  | -1.315798000 | 1             | 3.061272000  | 0.608050000  | -2.894276000 |
| 29 | 0.088631000  | 0.261811000  | -0.603512000 | 6             | 4.126925000  | 0.372152000  | -1.041552000 |
| 6  | 1.816675000  | 2.308150000  | -1.395426000 | 1             | 3.904402000  | 0.035529000  | -0.015604000 |
| 7  | -0.410257000 | 2.435891000  | -0.721036000 | 1             | 1.505215000  | -1.320020000 | -2.544156000 |
| 6  | 0.662319000  | 3.083362000  | -0.962238000 | 6             | 2.437521000  | -1.230103000 | -1.961100000 |
| 1  | 2.692113000  | 2.819076000  | -1.827674000 | 1             | 2.194887000  | -1.573825000 | -0.934959000 |
| 1  | 0.732125000  | 4.183774000  | -0.890241000 | 6             | 3.557335000  | -2.077309000 | -2.545273000 |
| 6  | -1.319227000 | -0.848167000 | -0.616223000 | 1             | 3.242991000  | -3.130909000 | -2.606533000 |
| 6  | -2.120530000 | -1.398408000 | 0.285390000  | 1             | 3.754635000  | -1.757149000 | -3.586806000 |
| 6  | -3.273313000 | -2.277431000 | 0.030093000  | 6             | 5.248674000  | -0.474643000 | -1.623029000 |
| 6  | -4.026323000 | -2.808271000 | 1.083695000  | 1             | 6.153609000  | -0.367836000 | -1.002663000 |
| 6  | -3.634211000 | -2.597507000 | -1.287605000 | 1             | 5.516860000  | -0.098928000 | -2.629625000 |
| 6  | -5.112597000 | -3.637205000 | 0.820132000  | 6             | 4.830647000  | -1.934877000 | -1.723635000 |
| 6  | -4.717228000 | -3.425593000 | -1.544028000 | 1             | 4.647517000  | -2.323404000 | -0.703658000 |
| 6  | -5.464205000 | -3.950562000 | -0.489484000 | 1             | 5.643610000  | -2.544525000 | -2.149594000 |
| 1  | -3.744408000 | -2.560040000 | 2.109132000  | <b>TS2-L1</b> |              |              |              |
| 1  | -3.045403000 | -2.182141000 | -2.112401000 | 7             | -1.566645000 | 2.131844000  | 0.623873000  |
| 1  | -5.692488000 | -4.045776000 | 1.652937000  | 29            | -0.252485000 | 0.737671000  | 0.200479000  |
| 1  | -4.984168000 | -3.665515000 | -2.577204000 | 6             | -1.155785000 | 3.349323000  | 0.552288000  |
| 1  | -6.318204000 | -4.603046000 | -0.690885000 | 7             | 0.906866000  | 2.564516000  | -0.180272000 |
| 7  | -1.893606000 | -1.131235000 | 1.685991000  | 6             | 0.192146000  | 3.592790000  | 0.060101000  |
| 7  | -0.922678000 | -0.471388000 | 2.094720000  | 1             | -1.785817000 | 4.186596000  | 0.890518000  |
| 7  | -0.036362000 | 0.091731000  | 1.330538000  | 1             | 0.559876000  | 4.626731000  | -0.060802000 |
| 6  | 0.990359000  | 0.800266000  | 2.056173000  | 6             | 0.842285000  | -0.633523000 | 0.636654000  |
| 1  | 1.151477000  | 1.789059000  | 1.578277000  | 6             | 1.772789000  | -1.381055000 | 0.036882000  |
| 1  | 0.625908000  | 1.003756000  | 3.080431000  | 6             | 2.998930000  | -1.870960000 | 0.689681000  |
| 6  | 2.311159000  | 0.075298000  | 2.127055000  | 6             | 3.862100000  | -2.747975000 | 0.020370000  |
| 6  | 2.406117000  | -1.291208000 | 1.855914000  | 6             | 3.346755000  | -1.429788000 | 1.975867000  |
| 6  | 3.465103000  | 0.771109000  | 2.502417000  | 6             | 5.039464000  | -3.171454000 | 0.628293000  |
| 6  | 3.634035000  | -1.944111000 | 1.949629000  | 6             | 4.522455000  | -1.858094000 | 2.577726000  |
| 6  | 4.689758000  | 0.119718000  | 2.599846000  | 6             | 5.376809000  | -2.731125000 | 1.905401000  |
| 6  | 4.779809000  | -1.242799000 | 2.316638000  | 1             | 3.593260000  | -3.085821000 | -0.983048000 |
| 1  | 1.505308000  | -1.842833000 | 1.567891000  | 1             | 2.673819000  | -0.741438000 | 2.499653000  |
| 1  | 3.397897000  | 1.843411000  | 2.718861000  | 1             | 5.704235000  | -3.857306000 | 0.095030000  |
| 1  | 3.693924000  | -3.016095000 | 1.738032000  | 1             | 4.777456000  | -1.506111000 | 3.581369000  |
| 1  | 5.582683000  | 0.677990000  | 2.895434000  | 1             | 6.304243000  | -3.066463000 | 2.377539000  |
| 1  | 5.741431000  | -1.758005000 | 2.391958000  | 7             | 1.655804000  | -1.714642000 | -1.340304000 |
| 6  | -1.626122000 | 3.086278000  | -0.326935000 | 7             | 0.616355000  | -1.345182000 | -1.931364000 |
| 1  | -2.340263000 | 3.200083000  | -2.372118000 | 7             | -0.259697000 | -0.581663000 | -1.340609000 |
| 1  | -1.470824000 | 4.186967000  | -0.226754000 | 6             | -1.526972000 | -0.541388000 | -2.036082000 |
| 6  | -2.689658000 | 2.822464000  | -1.396859000 | 1             | -1.908731000 | 0.498109000  | -2.037766000 |
| 1  | -2.783812000 | 1.723113000  | -1.494807000 | 1             | -1.349263000 | -0.811262000 | -3.093761000 |
| 1  | -1.335816000 | 2.649823000  | 1.781955000  | 6             | -2.578233000 | -1.469522000 | -1.467177000 |
| 6  | -2.115827000 | 2.527444000  | 1.010327000  | 6             | -2.307467000 | -2.345528000 | -0.414767000 |
| 1  | -2.270950000 | 1.439973000  | 0.883093000  | 6             | -3.857142000 | -1.475479000 | -2.037862000 |
| 6  | -3.426085000 | 3.183949000  | 1.414462000  | 6             | -3.291602000 | -3.224370000 | 0.039260000  |
| 1  | -3.752215000 | 2.795028000  | 2.391709000  | 6             | -4.835401000 | -2.354469000 | -1.588492000 |
| 1  | -3.275094000 | 4.272684000  | 1.548841000  | 6             | -4.552138000 | -3.239792000 | -0.548519000 |
| 6  | -4.019747000 | 3.447853000  | -1.004428000 | 1             | -1.313017000 | -2.340745000 | 0.046365000  |
| 1  | -4.773119000 | 3.244820000  | -1.782268000 | 1             | -4.078678000 | -0.788127000 | -2.863101000 |
| 1  | -3.908804000 | 4.548888000  | -0.967105000 | 1             | -3.061665000 | -3.912416000 | 0.857861000  |
| 6  | -4.489986000 | 2.943785000  | 0.352587000  | 1             | -5.824247000 | -2.355107000 | -2.055994000 |
| 1  | -4.691397000 | 1.858312000  | 0.286968000  | 1             | -5.317079000 | -3.937059000 | -0.196215000 |
| 1  | -5.442335000 | 3.420191000  | 0.635281000  | 6             | 2.271062000  | 2.642815000  | -0.624513000 |
| 6  | 2.850879000  | 0.230738000  | -1.869375000 | 1             | 3.089337000  | 2.754731000  | 1.377105000  |
| 1  | 4.420678000  | 1.434269000  | -0.973560000 | 1             | 2.557228000  | 3.697930000  | -0.842987000 |

|             |              |              |              |              |              |              |              |
|-------------|--------------|--------------|--------------|--------------|--------------|--------------|--------------|
| 6           | 3.170913000  | 2.099400000  | 0.493477000  | 1            | 1.432778000  | 0.224908000  | -2.243366000 |
| 1           | 2.765758000  | 1.115364000  | 0.790360000  | 1            | 1.376457000  | 1.817970000  | -3.027610000 |
| 1           | 1.785005000  | 2.222728000  | -2.690565000 | 6            | 2.650211000  | 1.744724000  | -1.300611000 |
| 6           | 2.416166000  | 1.799010000  | -1.891841000 | 6            | 2.576990000  | 2.533397000  | -0.150240000 |
| 1           | 2.012047000  | 0.795785000  | -1.668578000 | 6            | 3.908377000  | 1.399085000  | -1.805345000 |
| 6           | 3.866976000  | 1.671809000  | -2.323382000 | 6            | 3.743698000  | 2.992282000  | 0.460187000  |
| 1           | 3.927778000  | 1.057044000  | -3.235013000 | 6            | 5.071087000  | 1.857542000  | -1.195208000 |
| 1           | 4.271317000  | 2.667237000  | -2.592400000 | 6            | 4.991223000  | 2.666045000  | -0.062550000 |
| 6           | 4.613474000  | 1.941939000  | 0.042192000  | 1            | 1.599619000  | 2.815029000  | 0.255300000  |
| 1           | 5.207423000  | 1.512223000  | 0.865418000  | 1            | 3.973537000  | 0.776189000  | -2.705497000 |
| 1           | 5.054237000  | 2.934812000  | -0.173781000 | 1            | 3.671725000  | 3.622632000  | 1.350910000  |
| 6           | 4.698594000  | 1.069434000  | -1.201520000 | 1            | 6.046788000  | 1.589754000  | -1.611421000 |
| 1           | 4.305568000  | 0.059808000  | -0.966853000 | 1            | 5.902784000  | 3.036586000  | 0.414014000  |
| 1           | 5.746192000  | 0.933577000  | -1.513447000 | 6            | -2.682754000 | -2.217245000 | -1.177364000 |
| 6           | -2.883046000 | 1.850946000  | 1.169869000  | 1            | -3.376379000 | -2.063791000 | 0.873835000  |
| 1           | -3.929954000 | 2.549775000  | -0.590849000 | 1            | -3.248905000 | -3.158242000 | -1.357143000 |
| 1           | -3.222282000 | 2.718931000  | 1.776778000  | 6            | -3.312755000 | -1.426055000 | -0.024858000 |
| 6           | -3.878248000 | 1.639284000  | 0.030589000  | 1            | -2.590942000 | -0.626083000 | 0.207344000  |
| 1           | -3.485239000 | 0.830606000  | -0.610169000 | 1            | -2.225572000 | -1.941058000 | -3.277686000 |
| 1           | -2.079746000 | 0.777937000  | 2.867851000  | 6            | -2.641090000 | -1.357256000 | -2.439685000 |
| 6           | -2.809569000 | 0.612976000  | 2.057804000  | 1            | -1.928725000 | -0.531593000 | -2.238567000 |
| 1           | -2.408773000 | -0.218186000 | 1.441133000  | 6            | -4.004532000 | -0.775175000 | -2.775956000 |
| 6           | -4.182102000 | 0.232505000  | 2.587222000  | 1            | -3.935044000 | -0.177990000 | -3.698784000 |
| 1           | -4.102565000 | -0.662732000 | 3.223670000  | 1            | -4.720705000 | -1.591848000 | -2.992571000 |
| 1           | -4.571455000 | 1.038983000  | 3.238581000  | 6            | -4.645280000 | -0.783203000 | -0.363001000 |
| 6           | -5.246675000 | 1.235359000  | 0.556305000  | 1            | -4.963543000 | -0.170529000 | 0.499671000  |
| 1           | -5.931624000 | 1.061821000  | -0.289769000 | 1            | -5.423021000 | -1.557780000 | -0.507527000 |
| 1           | -5.682448000 | 2.068570000  | 1.140958000  | 6            | -4.525311000 | 0.065938000  | -1.619162000 |
| 6           | -5.142222000 | -0.004855000 | 1.431808000  | 1            | -3.816827000 | 0.896907000  | -1.427316000 |
| 1           | -4.759134000 | -0.843042000 | 0.818303000  | 1            | -5.491881000 | 0.529720000  | -1.871588000 |
| 1           | -6.135672000 | -0.309313000 | 1.797614000  | 6            | 2.369133000  | -2.448633000 | 0.896439000  |
| <b>P-L1</b> |              |              |              | 1            | 3.105252000  | -2.562056000 | -1.138074000 |
| 7           | 0.987895000  | -2.524038000 | 0.468704000  | 1            | 2.744160000  | -3.463493000 | 1.151883000  |
| 29          | 0.038155000  | -0.887936000 | -0.037364000 | 6            | 3.187210000  | -1.886894000 | -0.269424000 |
| 6           | 0.416013000  | -3.646944000 | 0.240985000  | 1            | 2.717426000  | -0.924023000 | -0.561398000 |
| 7           | -1.335947000 | -2.487438000 | -0.751001000 | 1            | 1.887186000  | -1.944587000 | 2.946127000  |
| 6           | -0.943752000 | -3.611943000 | -0.303920000 | 6            | 2.480053000  | -1.532857000 | 2.112694000  |
| 1           | 0.919150000  | -4.605650000 | 0.444301000  | 1            | 2.011756000  | -0.565453000 | 1.834477000  |
| 1           | -1.570031000 | -4.521314000 | -0.296049000 | 6            | 3.930981000  | -1.306041000 | 2.503055000  |
| 6           | -0.394443000 | 0.935747000  | -0.344594000 | 1            | 3.981304000  | -0.645154000 | 3.382481000  |
| 6           | -1.380123000 | 1.853785000  | 0.055611000  | 1            | 4.392718000  | -2.263751000 | 2.812233000  |
| 6           | -2.385233000 | 1.747281000  | 1.107677000  | 6            | 4.633428000  | -1.639171000 | 0.126356000  |
| 6           | -3.532334000 | 2.556816000  | 1.077365000  | 1            | 5.181287000  | -1.209065000 | -0.728405000 |
| 6           | -2.246102000 | 0.833600000  | 2.163995000  | 1            | 5.127876000  | -2.601724000 | 0.360888000  |
| 6           | -4.512387000 | 2.435969000  | 2.055854000  | 6            | 4.702318000  | -0.715598000 | 1.332337000  |
| 6           | -3.234673000 | 0.703413000  | 3.131676000  | 1            | 4.245746000  | 0.255051000  | 1.058557000  |
| 6           | -4.375814000 | 1.503397000  | 3.083145000  | 1            | 5.748048000  | -0.506698000 | 1.608806000  |
| 1           | -3.632879000 | 3.281797000  | 0.264307000  | <b>Ac-L2</b> |              |              |              |
| 1           | -1.341159000 | 0.214162000  | 2.208023000  | 7            | -1.533938000 | -1.705130000 | -0.265240000 |
| 1           | -5.399401000 | 3.075062000  | 2.014203000  | 29           | -0.126576000 | -0.284250000 | 0.024678000  |
| 1           | -3.107739000 | -0.018715000 | 3.943808000  | 6            | -1.011913000 | -2.824457000 | -0.668345000 |
| 1           | -5.150089000 | 1.407116000  | 3.849129000  | 7            | 1.095135000  | -1.928173000 | -0.196734000 |
| 7           | -1.313278000 | 2.972355000  | -0.722041000 | 6            | 0.417171000  | -2.929848000 | -0.669268000 |
| 7           | -0.354576000 | 2.848823000  | -1.565999000 | 6            | -2.899389000 | -1.497610000 | -0.128385000 |
| 7           | 0.192075000  | 1.631482000  | -1.361500000 | 6            | 2.477226000  | -1.922877000 | -0.086449000 |
| 6           | 1.408791000  | 1.312927000  | -2.047270000 | 6            | -5.187816000 | -2.261084000 | 0.141676000  |



|              |              |              |              |               |              |              |              |
|--------------|--------------|--------------|--------------|---------------|--------------|--------------|--------------|
| 6            | -3.835734000 | -2.534221000 | -0.005891000 | 6             | 5.001089000  | -1.188526000 | 0.212173000  |
| 6            | -5.631120000 | -0.931512000 | 0.167724000  | 6             | 5.570566000  | -2.461921000 | 0.341042000  |
| 6            | -4.700138000 | 0.110385000  | 0.062031000  | 6             | 3.460444000  | -3.445155000 | -0.293177000 |
| 6            | -3.356607000 | -0.166947000 | -0.075825000 | 6             | 4.785269000  | -3.594587000 | 0.096650000  |
| 6            | 3.124290000  | -0.677349000 | 0.031607000  | 8             | -6.051144000 | 0.597508000  | -1.373218000 |
| 6            | 4.496249000  | -0.607087000 | 0.148442000  | 6             | -7.152418000 | -0.223019000 | -1.133226000 |
| 6            | 5.267655000  | -1.776594000 | 0.174372000  | 8             | 6.857365000  | -2.504677000 | 0.711678000  |
| 6            | 3.255567000  | -3.089394000 | -0.046207000 | 6             | 7.480143000  | -3.743539000 | 0.837832000  |
| 6            | 4.634970000  | -3.024037000 | 0.087020000  | 1             | -1.167742000 | -3.301566000 | -2.166385000 |
| 8            | -6.911391000 | -0.571941000 | 0.303510000  | 1             | 1.312966000  | -3.787576000 | -1.839262000 |
| 6            | -7.886481000 | -1.562576000 | 0.408464000  | 1             | -5.392155000 | -2.002786000 | -0.947769000 |
| 8            | 6.589165000  | -1.613959000 | 0.298406000  | 1             | -3.081644000 | -2.840022000 | -1.016882000 |
| 6            | 7.410819000  | -2.739367000 | 0.321169000  | 1             | -3.999035000 | 1.966661000  | -1.884456000 |
| 1            | -1.619237000 | -3.666639000 | -1.029672000 | 1             | -1.624242000 | 1.106579000  | -1.921308000 |
| 1            | 0.893320000  | -3.828372000 | -1.088393000 | 1             | 3.230380000  | -0.050940000 | -0.270190000 |
| 1            | -5.889994000 | -3.089155000 | 0.255935000  | 1             | 5.630480000  | -0.318408000 | 0.413106000  |
| 1            | -3.503930000 | -3.575748000 | 0.016735000  | 1             | 2.852269000  | -4.341757000 | -0.440956000 |
| 1            | -5.068899000 | 1.138050000  | 0.094274000  | 1             | 5.192530000  | -4.599698000 | 0.223009000  |
| 1            | -2.616264000 | 0.638341000  | -0.161276000 | 1             | -7.263323000 | -0.995079000 | -1.915106000 |
| 1            | 2.510622000  | 0.231807000  | 0.007328000  | 1             | -7.081973000 | -0.722643000 | -0.150176000 |
| 1            | 5.011084000  | 0.353184000  | 0.226554000  | 1             | -8.038835000 | 0.421485000  | -1.143083000 |
| 1            | 2.776225000  | -4.071626000 | -0.073642000 | 1             | 7.470748000  | -4.306355000 | -0.112572000 |
| 1            | 5.210033000  | -3.950508000 | 0.140152000  | 1             | 8.520389000  | -3.550955000 | 1.124273000  |
| 1            | -7.905942000 | -2.213598000 | -0.483179000 | 1             | 7.006381000  | -4.364449000 | 1.619087000  |
| 1            | -7.736354000 | -2.191826000 | 1.303321000  | 6             | 1.269573000  | 1.532150000  | -0.677213000 |
| 1            | -8.851876000 | -1.051366000 | 0.494584000  | 6             | 1.720393000  | 2.667926000  | -0.496789000 |
| 1            | 7.318655000  | -3.332408000 | -0.605759000 | 6             | 2.224463000  | 3.980597000  | -0.307554000 |
| 1            | 8.442013000  | -2.379352000 | 0.409859000  | 6             | 1.995555000  | 4.675462000  | 0.897590000  |
| 1            | 7.187228000  | -3.392724000 | 1.182920000  | 6             | 2.967045000  | 4.631206000  | -1.313736000 |
| 6            | 0.134389000  | 1.535082000  | -0.001386000 | 6             | 2.486866000  | 5.960411000  | 1.082697000  |
| 6            | 0.326276000  | 2.755659000  | -0.022980000 | 6             | 3.455472000  | 5.916173000  | -1.119070000 |
| 6            | 0.536147000  | 4.157241000  | -0.035740000 | 6             | 3.219555000  | 6.589997000  | 0.077870000  |
| 6            | 0.736344000  | 4.874359000  | 1.161800000  | 1             | 1.420852000  | 4.177989000  | 1.684438000  |
| 6            | 0.551388000  | 4.879961000  | -1.246510000 | 1             | 3.150857000  | 4.103036000  | -2.253144000 |
| 6            | 0.939868000  | 6.247166000  | 1.144386000  | 1             | 2.295934000  | 6.479934000  | 2.026432000  |
| 6            | 0.758514000  | 6.252451000  | -1.254050000 | 1             | 4.029346000  | 6.401058000  | -1.914436000 |
| 6            | 0.953412000  | 6.946522000  | -0.061234000 | 1             | 3.605371000  | 7.602036000  | 0.226971000  |
| 1            | 0.726641000  | 4.326063000  | 2.107524000  | 7             | 0.032615000  | 1.844366000  | 2.404945000  |
| 1            | 0.396798000  | 4.336325000  | -2.182329000 | 7             | -0.293167000 | 0.872843000  | 1.934730000  |
| 1            | 1.091577000  | 6.781436000  | 2.087012000  | 7             | -0.512444000 | -0.114433000 | 1.222453000  |
| 1            | 0.766900000  | 6.790799000  | -2.206486000 | 6             | -1.355889000 | -1.167973000 | 1.760347000  |
| 1            | 1.115007000  | 8.027674000  | -0.071160000 | 1             | -1.244351000 | -2.009136000 | 1.052768000  |
| <b>RC-L2</b> |              |              |              | 1             | -0.955671000 | -1.533046000 | 2.725735000  |
| 7            | -0.880783000 | -1.325219000 | -1.491852000 | 6             | -2.816650000 | -0.814300000 | 1.910020000  |
| 29           | 0.513495000  | -0.171558000 | -0.662977000 | 6             | -3.323725000 | 0.441739000  | 1.581558000  |
| 6            | -0.493280000 | -2.546373000 | -1.737441000 | 6             | -3.694306000 | -1.796243000 | 2.384071000  |
| 7            | 1.557938000  | -1.972074000 | -0.789523000 | 6             | -4.683069000 | 0.714545000  | 1.730816000  |
| 6            | 0.871598000  | -2.854081000 | -1.460970000 | 6             | -5.049153000 | -1.527167000 | 2.527448000  |
| 6            | -2.208950000 | -0.923918000 | -1.516517000 | 6             | -5.548283000 | -0.264735000 | 2.204623000  |
| 6            | 2.885702000  | -2.173546000 | -0.435538000 | 1             | -2.663554000 | 1.216960000  | 1.180987000  |
| 6            | -4.583221000 | -1.316243000 | -1.206362000 | 1             | -3.304100000 | -2.786167000 | 2.645810000  |
| 6            | -3.278669000 | -1.788653000 | -1.252963000 | 1             | -5.066784000 | 1.702456000  | 1.459489000  |
| 6            | -4.835101000 | 0.041496000  | -1.437233000 | 1             | -5.720742000 | -2.303182000 | 2.905568000  |
| 6            | -3.771386000 | 0.911698000  | -1.713603000 | 1             | -6.611930000 | -0.044544000 | 2.333827000  |
| 6            | -2.475358000 | 0.440322000  | -1.734175000 | <b>TS1-L2</b> |              |              |              |
| 6            | 3.680279000  | -1.044701000 | -0.157901000 | 7             | -1.090087000 | -1.617401000 | -1.320756000 |

|    |              |              |              |              |              |              |              |
|----|--------------|--------------|--------------|--------------|--------------|--------------|--------------|
| 29 | 0.259526000  | -0.305386000 | -0.772424000 | 6            | -3.022416000 | 0.934470000  | 1.313128000  |
| 6  | -0.741842000 | -2.872627000 | -1.265010000 | 6            | -3.526077000 | -0.969393000 | 2.693571000  |
| 7  | 1.353836000  | -2.167012000 | -0.552608000 | 6            | -4.347191000 | 1.355242000  | 1.420043000  |
| 6  | 0.624250000  | -3.161179000 | -0.955956000 | 6            | -4.847495000 | -0.552457000 | 2.799364000  |
| 6  | -2.416727000 | -1.203730000 | -1.384486000 | 6            | -5.262339000 | 0.618890000  | 2.164832000  |
| 6  | 2.694679000  | -2.256598000 | -0.226444000 | 1            | -2.310676000 | 1.513796000  | 0.715489000  |
| 6  | -4.756278000 | -1.423190000 | -0.788668000 | 1            | -3.200265000 | -1.883321000 | 3.203588000  |
| 6  | -3.464555000 | -1.930015000 | -0.807902000 | 1            | -4.666802000 | 2.267829000  | 0.907545000  |
| 6  | -5.018174000 | -0.175268000 | -1.365781000 | 1            | -5.556739000 | -1.135824000 | 3.394069000  |
| 6  | -3.977683000 | 0.548353000  | -1.965457000 | 1            | -6.296283000 | 0.962789000  | 2.263670000  |
| 6  | -2.692102000 | 0.051117000  | -1.955764000 | <b>IC-L2</b> |              |              |              |
| 6  | 3.235428000  | -1.202972000 | 0.536831000  | 7            | -1.484505000 | -1.118936000 | -0.996346000 |
| 6  | 4.555551000  | -1.223125000 | 0.930983000  | 29           | 0.006071000  | 0.067038000  | -0.472612000 |
| 6  | 5.387688000  | -2.287592000 | 0.556892000  | 6            | -1.194299000 | -2.373855000 | -1.171006000 |
| 6  | 3.538225000  | -3.309528000 | -0.607186000 | 7            | 1.064304000  | -1.905542000 | -0.777679000 |
| 6  | 4.871905000  | -3.331249000 | -0.223169000 | 6            | 0.168731000  | -2.799821000 | -1.032633000 |
| 8  | -6.217791000 | 0.416311000  | -1.353777000 | 6            | -2.785727000 | -0.624835000 | -1.097818000 |
| 6  | -7.294824000 | -0.263117000 | -0.785314000 | 6            | 2.410232000  | -2.172264000 | -0.619848000 |
| 8  | 6.656944000  | -2.221030000 | 0.973742000  | 6            | -5.199403000 | -0.866748000 | -1.127286000 |
| 6  | 7.538515000  | -3.242455000 | 0.625616000  | 6            | -3.932093000 | -1.423423000 | -1.021392000 |
| 1  | -1.462388000 | -3.682368000 | -1.447356000 | 6            | -5.341755000 | 0.514191000  | -1.303168000 |
| 1  | 0.994661000  | -4.194761000 | -1.033833000 | 6            | -4.199577000 | 1.324266000  | -1.366464000 |
| 1  | -5.541580000 | -1.982917000 | -0.276778000 | 6            | -2.945232000 | 0.763851000  | -1.258403000 |
| 1  | -3.252307000 | -2.873718000 | -0.294381000 | 6            | 3.193600000  | -1.203693000 | 0.040286000  |
| 1  | -4.211834000 | 1.521791000  | -2.402628000 | 6            | 4.540994000  | -1.409085000 | 0.245738000  |
| 1  | -1.857673000 | 0.618594000  | -2.383173000 | 6            | 5.160101000  | -2.575101000 | -0.224252000 |
| 1  | 2.575764000  | -0.370619000 | 0.809182000  | 6            | 3.042709000  | -3.331184000 | -1.097339000 |
| 1  | 4.986305000  | -0.415257000 | 1.526703000  | 6            | 4.401678000  | -3.534375000 | -0.909821000 |
| 1  | 3.158763000  | -4.115876000 | -1.240915000 | 8            | -6.519132000 | 1.141015000  | -1.407853000 |
| 1  | 5.508485000  | -4.156513000 | -0.548137000 | 6            | -7.691072000 | 0.388890000  | -1.354614000 |
| 1  | -7.493604000 | -1.217559000 | -1.304310000 | 8            | 6.471490000  | -2.686005000 | 0.009837000  |
| 1  | -7.124720000 | -0.470919000 | 0.286255000  | 6            | 7.145362000  | -3.823535000 | -0.431075000 |
| 1  | -8.171724000 | 0.386116000  | -0.888555000 | 1            | -1.957244000 | -3.113436000 | -1.447826000 |
| 1  | 7.658776000  | -3.324644000 | -0.469007000 | 1            | 0.394403000  | -3.874209000 | -1.131568000 |
| 1  | 8.508518000  | -2.991337000 | 1.069430000  | 1            | -6.073219000 | -1.515306000 | -1.039748000 |
| 1  | 7.209083000  | -4.220226000 | 1.019335000  | 1            | -3.847880000 | -2.495128000 | -0.822792000 |
| 6  | 1.165069000  | 1.269531000  | -0.952714000 | 1            | -4.334686000 | 2.399966000  | -1.499143000 |
| 6  | 1.554095000  | 2.324933000  | -0.366649000 | 1            | -2.045572000 | 1.389809000  | -1.303372000 |
| 6  | 2.275055000  | 3.568359000  | -0.360349000 | 1            | 2.706090000  | -0.292300000 | 0.400850000  |
| 6  | 2.078911000  | 4.577629000  | 0.595713000  | 1            | 5.154882000  | -0.671409000 | 0.767244000  |
| 6  | 3.219482000  | 3.790443000  | -1.382237000 | 1            | 2.473236000  | -4.073940000 | -1.662647000 |
| 6  | 2.803943000  | 5.761950000  | 0.526509000  | 1            | 4.868130000  | -4.435112000 | -1.313639000 |
| 6  | 3.936063000  | 4.976242000  | -1.443530000 | 1            | -7.736151000 | -0.357196000 | -2.167469000 |
| 6  | 3.734327000  | 5.970654000  | -0.487658000 | 1            | -7.798059000 | -0.134989000 | -0.388309000 |
| 1  | 1.349349000  | 4.425038000  | 1.391822000  | 1            | -8.525605000 | 1.089630000  | -1.470466000 |
| 1  | 3.377122000  | 3.004797000  | -2.126542000 | 1            | 7.104525000  | -3.923687000 | -1.529995000 |
| 1  | 2.635421000  | 6.537465000  | 1.279364000  | 1            | 8.191814000  | -3.712284000 | -0.125542000 |
| 1  | 4.664018000  | 5.126103000  | -2.246056000 | 1            | 6.736997000  | -4.743256000 | 0.023578000  |
| 1  | 4.300356000  | 6.904858000  | -0.534508000 | 6            | 0.937038000  | 1.594292000  | -0.523806000 |
| 7  | 0.816416000  | 2.106227000  | 1.449920000  | 6            | 1.603278000  | 2.351772000  | 0.335853000  |
| 7  | 0.140098000  | 1.172902000  | 1.693709000  | 6            | 2.342506000  | 3.590063000  | 0.042917000  |
| 7  | -0.274003000 | 0.117248000  | 1.096726000  | 6            | 2.965610000  | 4.318952000  | 1.062452000  |
| 6  | -1.167872000 | -0.718492000 | 1.864243000  | 6            | 2.432182000  | 4.059548000  | -1.276262000 |
| 1  | -1.151400000 | -1.712543000 | 1.376842000  | 6            | 3.659245000  | 5.487884000  | 0.764371000  |
| 1  | -0.775516000 | -0.883141000 | 2.885534000  | 6            | 3.123983000  | 5.226271000  | -1.567101000 |
| 6  | -2.597013000 | -0.229399000 | 1.953046000  | 6            | 3.742770000  | 5.948098000  | -0.546462000 |

|               |              |              |              |             |              |              |              |
|---------------|--------------|--------------|--------------|-------------|--------------|--------------|--------------|
| 1             | 2.895549000  | 3.952683000  | 2.088891000  | 1           | -8.314038000 | -2.035786000 | -0.163050000 |
| 1             | 1.948697000  | 3.486830000  | -2.074803000 | 1           | 7.980798000  | -1.771296000 | -1.135036000 |
| 1             | 4.141318000  | 6.048410000  | 1.570748000  | 1           | 8.894280000  | -0.765402000 | 0.029294000  |
| 1             | 3.184424000  | 5.577690000  | -2.601085000 | 1           | 7.724752000  | -1.978481000 | 0.629121000  |
| 1             | 4.288959000  | 6.867375000  | -0.775078000 | 6           | 0.045901000  | 1.944534000  | -0.259906000 |
| 7             | 1.656730000  | 1.959489000  | 1.725083000  | 6           | -0.155774000 | 2.968043000  | 0.572061000  |
| 7             | 1.040075000  | 0.974092000  | 2.167810000  | 6           | -0.574438000 | 4.315115000  | 0.148047000  |
| 7             | 0.317794000  | 0.172088000  | 1.447787000  | 6           | -0.877645000 | 5.295277000  | 1.101059000  |
| 6             | -0.286369000 | -0.915953000 | 2.183467000  | 6           | -0.680613000 | 4.639430000  | -1.212891000 |
| 1             | 0.055855000  | -1.884223000 | 1.763914000  | 6           | -1.278956000 | 6.564673000  | 0.697272000  |
| 1             | 0.081916000  | -0.880413000 | 3.225167000  | 6           | -1.083307000 | 5.906921000  | -1.609013000 |
| 6             | -1.794392000 | -0.889138000 | 2.173077000  | 6           | -1.385316000 | 6.878093000  | -0.654778000 |
| 6             | -2.495659000 | 0.314925000  | 2.083548000  | 1           | -0.791285000 | 5.041290000  | 2.159744000  |
| 6             | -2.514824000 | -2.081706000 | 2.288132000  | 1           | -0.435444000 | 3.877700000  | -1.960502000 |
| 6             | -3.887737000 | 0.326951000  | 2.132897000  | 1           | -1.512053000 | 7.321159000  | 1.452401000  |
| 6             | -3.904830000 | -2.071001000 | 2.349518000  | 1           | -1.159464000 | 6.143121000  | -2.674241000 |
| 6             | -4.595605000 | -0.862724000 | 2.276136000  | 1           | -1.700509000 | 7.877532000  | -0.966889000 |
| 1             | -1.936149000 | 1.249265000  | 1.965271000  | 7           | 0.013160000  | 2.799634000  | 1.969651000  |
| 1             | -1.969598000 | -3.031725000 | 2.343865000  | 7           | 0.417120000  | 1.679548000  | 2.356995000  |
| 1             | -4.424327000 | 1.277920000  | 2.058337000  | 7           | 0.658620000  | 0.732415000  | 1.501769000  |
| 1             | -4.454009000 | -3.011715000 | 2.453242000  | 6           | 1.205489000  | -0.475062000 | 2.098707000  |
| 1             | -5.688679000 | -0.850865000 | 2.317817000  | 1           | 2.201098000  | -0.695439000 | 1.668663000  |
| <b>TS2-L2</b> |              |              |              | 1           | 1.361038000  | -0.277184000 | 3.174731000  |
| 7             | -1.018874000 | -1.377906000 | -1.130366000 | 6           | 0.306644000  | -1.669024000 | 1.907252000  |
| 29            | 0.192395000  | 0.164272000  | -0.476438000 | 6           | -1.074420000 | -1.542035000 | 2.095036000  |
| 6             | -0.336482000 | -2.320699000 | -1.706877000 | 6           | 0.826556000  | -2.907672000 | 1.529335000  |
| 7             | 1.608809000  | -1.173670000 | -1.111864000 | 6           | -1.915945000 | -2.631476000 | 1.906783000  |
| 6             | 1.089436000  | -2.211088000 | -1.693052000 | 6           | -0.014587000 | -4.000335000 | 1.334075000  |
| 6             | -2.399449000 | -1.405738000 | -0.991466000 | 6           | -1.389626000 | -3.862567000 | 1.517271000  |
| 6             | 2.971982000  | -1.006966000 | -0.916054000 | 1           | -1.484490000 | -0.562498000 | 2.368084000  |
| 6             | -4.551519000 | -2.531287000 | -0.950560000 | 1           | 1.907995000  | -3.000919000 | 1.362636000  |
| 6             | -3.185699000 | -2.548397000 | -1.195143000 | 1           | -2.997963000 | -2.511797000 | 2.032295000  |
| 6             | -5.163463000 | -1.357116000 | -0.491142000 | 1           | 0.403178000  | -4.965865000 | 1.032998000  |
| 6             | -4.384755000 | -0.211569000 | -0.277172000 | 1           | -2.053139000 | -4.718466000 | 1.360928000  |
| 6             | -3.027778000 | -0.238227000 | -0.521025000 | <b>P-L2</b> |              |              |              |
| 6             | 3.443324000  | 0.295262000  | -0.660494000 | 7           | 1.434493000  | -2.129131000 | -0.425185000 |
| 6             | 4.783132000  | 0.524427000  | -0.430250000 | 29          | -0.042705000 | -0.588351000 | -0.222277000 |
| 6             | 5.694854000  | -0.540703000 | -0.426192000 | 6           | 0.956622000  | -3.240448000 | 0.045850000  |
| 6             | 3.885957000  | -2.069245000 | -0.888886000 | 7           | -1.123856000 | -2.188274000 | 0.197692000  |
| 6             | 5.235054000  | -1.845231000 | -0.646811000 | 6           | -0.460953000 | -3.306470000 | 0.243857000  |
| 8             | -6.469158000 | -1.245710000 | -0.226557000 | 6           | 2.778983000  | -1.834250000 | -0.544800000 |
| 6             | -7.297432000 | -2.348873000 | -0.426197000 | 6           | -2.509841000 | -2.099929000 | 0.241853000  |
| 8             | 6.972343000  | -0.226038000 | -0.187363000 | 6           | 5.115685000  | -2.078349000 | 0.054142000  |
| 6             | 7.927090000  | -1.241279000 | -0.167766000 | 6           | 3.803206000  | -2.514955000 | 0.131213000  |
| 1             | -0.803044000 | -3.182166000 | -2.203709000 | 6           | 5.428335000  | -0.944469000 | -0.712380000 |
| 1             | 1.700119000  | -2.991539000 | -2.169856000 | 6           | 4.419545000  | -0.282656000 | -1.424810000 |
| 1             | -5.131781000 | -3.443287000 | -1.104003000 | 6           | 3.116476000  | -0.713239000 | -1.328858000 |
| 1             | -2.725078000 | -3.490862000 | -1.502182000 | 6           | -3.063236000 | -0.854465000 | 0.592686000  |
| 1             | -4.881450000 | 0.691244000  | 0.085395000  | 6           | -4.428016000 | -0.663539000 | 0.631589000  |
| 1             | -2.408831000 | 0.651558000  | -0.353029000 | 6           | -5.288522000 | -1.724013000 | 0.315634000  |
| 1             | 2.718003000  | 1.118233000  | -0.653826000 | 6           | -3.377615000 | -3.150873000 | -0.082350000 |
| 1             | 5.164329000  | 1.530108000  | -0.239030000 | 6           | -4.753213000 | -2.969953000 | -0.045077000 |
| 1             | 3.535387000  | -3.097333000 | -1.019643000 | 8           | 6.650091000  | -0.417076000 | -0.796769000 |
| 1             | 5.919143000  | -2.695316000 | -0.612092000 | 6           | 7.667392000  | -0.934200000 | 0.003519000  |
| 1             | -7.288116000 | -2.682408000 | -1.478756000 | 8           | -6.598052000 | -1.463869000 | 0.371932000  |
| 1             | -7.009488000 | -3.199080000 | 0.216998000  | 6           | -7.506397000 | -2.479696000 | 0.078393000  |

|              |              |              |              |   |              |              |              |
|--------------|--------------|--------------|--------------|---|--------------|--------------|--------------|
| 1            | 1.581202000  | -4.111981000 | 0.292203000  | 6 | 1.969039000  | 3.944135000  | -0.033236000 |
| 1            | -0.947854000 | -4.268504000 | 0.457385000  | 6 | 2.502539000  | 4.484194000  | 1.155447000  |
| 1            | 5.888035000  | -2.600043000 | 0.622461000  | 6 | 2.191116000  | 4.649847000  | -1.233860000 |
| 1            | 3.567166000  | -3.366638000 | 0.775222000  | 6 | 3.220383000  | 5.671838000  | 1.139585000  |
| 1            | 4.690065000  | 0.606466000  | -1.999007000 | 6 | 2.915051000  | 5.834089000  | -1.240854000 |
| 1            | 2.304741000  | -0.167296000 | -1.822280000 | 6 | 3.433961000  | 6.354736000  | -0.056632000 |
| 1            | -2.376113000 | -0.039804000 | 0.851859000  | 1 | 2.336819000  | 3.947611000  | 2.093431000  |
| 1            | -4.856378000 | 0.306085000  | 0.905825000  | 1 | 1.781250000  | 4.243902000  | -2.162537000 |
| 1            | -2.977400000 | -4.114042000 | -0.411484000 | 1 | 3.622250000  | 6.071509000  | 2.075427000  |
| 1            | -5.406175000 | -3.799385000 | -0.323602000 | 1 | 3.075670000  | 6.362110000  | -2.185524000 |
| 1            | 7.398710000  | -0.886879000 | 1.074153000  | 1 | 4.001663000  | 7.288926000  | -0.065779000 |
| 1            | 7.906740000  | -1.979887000 | -0.258123000 | 6 | 2.004401000  | -2.184527000 | -0.062816000 |
| 1            | 8.555161000  | -0.315598000 | -0.169458000 | 6 | 2.509239000  | -2.838681000 | -1.356802000 |
| 1            | -7.396091000 | -3.338179000 | 0.764007000  | 1 | 1.975709000  | -3.786345000 | -1.553180000 |
| 1            | -8.509117000 | -2.055272000 | 0.201432000  | 1 | 2.305679000  | -2.161867000 | -2.207215000 |
| 1            | -7.397723000 | -2.839345000 | -0.959923000 | 1 | 1.861057000  | -2.699163000 | 2.038000000  |
| 6            | 0.249552000  | 1.274872000  | -0.398537000 | 6 | 2.247395000  | -3.154458000 | 1.108545000  |
| 6            | 1.306160000  | 2.144870000  | -0.086050000 | 1 | 1.666817000  | -4.080673000 | 0.930802000  |
| 6            | 2.558971000  | 1.855340000  | 0.600758000  | 1 | 4.354296000  | -3.599703000 | -2.177596000 |
| 6            | 3.689090000  | 2.658729000  | 0.379761000  | 6 | 4.006428000  | -3.135500000 | -1.238155000 |
| 6            | 2.684060000  | 0.760564000  | 1.470534000  | 6 | 4.232134000  | -4.101956000 | -0.073737000 |
| 6            | 4.904726000  | 2.358116000  | 0.982892000  | 1 | 3.698363000  | -5.052319000 | -0.258363000 |
| 6            | 3.900892000  | 0.461591000  | 2.071771000  | 1 | 3.894108000  | -4.161846000 | 2.066785000  |
| 6            | 5.020838000  | 1.256084000  | 1.829357000  | 1 | 5.305388000  | -4.349064000 | 0.010037000  |
| 1            | 3.587695000  | 3.520600000  | -0.286040000 | 6 | 3.739450000  | -3.463147000 | 1.225765000  |
| 1            | 1.801492000  | 0.140927000  | 1.674134000  | 6 | 4.510773000  | -2.166617000 | 1.479606000  |
| 1            | 5.774719000  | 2.993722000  | 0.792650000  | 1 | 4.176852000  | -1.704220000 | 2.425459000  |
| 1            | 3.974909000  | -0.397857000 | 2.746017000  | 1 | 5.587702000  | -2.386131000 | 1.591731000  |
| 1            | 5.975312000  | 1.030196000  | 2.315445000  | 6 | 4.777481000  | -1.840014000 | -0.984163000 |
| 7            | 1.044486000  | 3.388232000  | -0.575626000 | 1 | 4.636039000  | -1.140634000 | -1.827101000 |
| 7            | -0.100567000 | 3.381671000  | -1.159238000 | 6 | 4.283638000  | -1.202292000 | 0.314790000  |
| 7            | -0.582179000 | 2.126399000  | -1.066481000 | 1 | 4.827388000  | -0.260415000 | 0.498695000  |
| 6            | -1.897387000 | 1.863652000  | -1.575679000 | 6 | 2.794011000  | -0.896715000 | 0.188841000  |
| 1            | -1.993218000 | 2.329462000  | -2.570354000 | 1 | 2.400891000  | -0.413053000 | 1.101741000  |
| 1            | -1.980597000 | 0.769394000  | -1.719713000 | 1 | 2.601705000  | -0.184478000 | -0.633620000 |
| 6            | -3.010344000 | 2.345100000  | -0.678695000 | 6 | -3.294188000 | -0.540576000 | -0.061040000 |
| 6            | -2.787645000 | 2.657383000  | 0.663867000  | 6 | -4.102764000 | -1.417689000 | 0.906374000  |
| 6            | -4.305996000 | 2.449181000  | -1.191889000 | 1 | -4.142468000 | -2.458418000 | 0.535037000  |
| 6            | -3.846919000 | 3.053608000  | 1.477821000  | 1 | -3.591306000 | -1.439289000 | 1.886232000  |
| 6            | -5.362145000 | 2.851890000  | -0.381818000 | 1 | -3.386613000 | 0.074258000  | -2.133007000 |
| 6            | -5.136035000 | 3.153313000  | 0.959701000  | 6 | -3.984994000 | -0.537038000 | -1.433335000 |
| 1            | -1.772099000 | 2.595492000  | 1.071649000  | 1 | -4.010312000 | -1.567528000 | -1.836014000 |
| 1            | -4.485071000 | 2.218015000  | -2.247590000 | 1 | -6.091523000 | -1.505578000 | 1.739247000  |
| 1            | -3.658740000 | 3.299745000  | 2.526658000  | 6 | -5.522415000 | -0.864652000 | 1.043409000  |
| 1            | -6.368658000 | 2.936006000  | -0.801007000 | 6 | -6.198595000 | -0.867148000 | -0.329043000 |
| 1            | -5.962825000 | 3.475316000  | 1.598540000  | 1 | -6.263950000 | -1.899268000 | -0.719344000 |
| <b>Ac-L3</b> |              |              |              | 1 | -5.888683000 | 0.009491000  | -2.287263000 |
| 7            | -1.918234000 | -1.017384000 | -0.206922000 | 1 | -7.233916000 | -0.492857000 | -0.240790000 |
| 29           | -0.300375000 | 0.069913000  | 0.070324000  | 6 | -5.404159000 | 0.013478000  | -1.295330000 |
| 6            | -1.673594000 | -2.235460000 | -0.539835000 | 6 | -5.347417000 | 1.442811000  | -0.753142000 |
| 7            | 0.584176000  | -1.855873000 | -0.072715000 | 1 | -4.790503000 | 2.092884000  | -1.450813000 |
| 6            | -0.281151000 | -2.642396000 | -0.604236000 | 1 | -6.368777000 | 1.855958000  | -0.674264000 |
| 1            | -2.466946000 | -2.959138000 | -0.784128000 | 6 | -5.466665000 | 0.564564000  | 1.584265000  |
| 1            | -0.024933000 | -3.594432000 | -1.094825000 | 1 | -4.996653000 | 0.575224000  | 2.583884000  |
| 6            | 0.594136000  | 1.676067000  | 0.005513000  | 6 | -4.670509000 | 1.443333000  | 0.618770000  |
| 6            | 1.237690000  | 2.730552000  | -0.020396000 | 1 | -4.618720000 | 2.474340000  | 1.007454000  |

|              |              |              |              |               |              |              |              |
|--------------|--------------|--------------|--------------|---------------|--------------|--------------|--------------|
| 6            | -3.252885000 | 0.890925000  | 0.478083000  | 6             | 5.468179000  | -0.901758000 | 1.002135000  |
| 1            | -2.646588000 | 1.513926000  | -0.205326000 | 6             | 5.571833000  | 0.619251000  | 0.876894000  |
| 1            | -2.724945000 | 0.893640000  | 1.450680000  | 1             | 5.003078000  | 1.107323000  | 1.688688000  |
| 1            | -6.490390000 | 0.960956000  | 1.707054000  | 1             | 6.624602000  | 0.934836000  | 0.988347000  |
| 1            | 5.859669000  | -2.053207000 | -0.921225000 | 6             | 5.837978000  | 0.400839000  | -1.598509000 |
| <b>RC-L3</b> |              |              |              | 1             | 5.464384000  | 0.730001000  | -2.584285000 |
| 7            | -0.571581000 | -1.779944000 | -0.597177000 | 6             | 5.027026000  | 1.059619000  | -0.482901000 |
| 29           | 0.529862000  | 0.037624000  | -0.490458000 | 1             | 5.092053000  | 2.157133000  | -0.572383000 |
| 6            | 0.254069000  | -2.763333000 | -0.705246000 | 6             | 3.563944000  | 0.636324000  | -0.597506000 |
| 7            | 2.027206000  | -1.250561000 | -0.619698000 | 1             | 2.959718000  | 1.120563000  | 0.189301000  |
| 6            | 1.661716000  | -2.486321000 | -0.534586000 | 1             | 3.123651000  | 0.951246000  | -1.561162000 |
| 1            | -0.055236000 | -3.786184000 | -0.970986000 | 6             | -1.983571000 | -1.978186000 | -0.934208000 |
| 1            | 2.375227000  | -3.314281000 | -0.399560000 | 6             | -2.690057000 | -2.686917000 | 0.234288000  |
| 6            | -0.186390000 | 1.734052000  | -0.800975000 | 1             | -2.221429000 | -3.679042000 | 0.388078000  |
| 6            | -0.664683000 | 2.874340000  | -0.778747000 | 1             | -2.541924000 | -2.103622000 | 1.160238000  |
| 6            | -1.200276000 | 4.187973000  | -0.777189000 | 1             | -1.649389000 | -2.327308000 | -3.046134000 |
| 6            | -1.075447000 | 5.020155000  | 0.354291000  | 6             | -2.183800000 | -2.815163000 | -2.209804000 |
| 6            | -1.875508000 | 4.703035000  | -1.902666000 | 1             | -1.754490000 | -3.825895000 | -2.089842000 |
| 6            | -1.602539000 | 6.304272000  | 0.355402000  | 1             | -4.669187000 | -3.345993000 | 0.774683000  |
| 6            | -2.400321000 | 5.988251000  | -1.891743000 | 6             | -4.180042000 | -2.837889000 | -0.075407000 |
| 6            | -2.268931000 | 6.797912000  | -0.764947000 | 6             | -4.361081000 | -3.664661000 | -1.349041000 |
| 1            | -0.549051000 | 4.631784000  | 1.231182000  | 1             | -3.933078000 | -4.675019000 | -1.213436000 |
| 1            | -1.976666000 | 4.069210000  | -2.787701000 | 1             | -3.794414000 | -3.557396000 | -3.437680000 |
| 1            | -1.491163000 | 6.931679000  | 1.244783000  | 1             | -5.436262000 | -3.798419000 | -1.564571000 |
| 1            | -2.919778000 | 6.365948000  | -2.777530000 | 6             | -3.675908000 | -2.955688000 | -2.519292000 |
| 1            | -2.682815000 | 7.809793000  | -0.760499000 | 6             | -4.299039000 | -1.575183000 | -2.720621000 |
| 7            | 1.018043000  | 2.576571000  | 2.301018000  | 1             | -3.823898000 | -1.064099000 | -3.576788000 |
| 7            | 1.009277000  | 1.466091000  | 2.105215000  | 1             | -5.372548000 | -1.677509000 | -2.961499000 |
| 7            | 1.054005000  | 0.309852000  | 1.675457000  | 6             | -4.801719000 | -1.455153000 | -0.277335000 |
| 6            | 0.558638000  | -0.756868000 | 2.526712000  | 1             | -4.691730000 | -0.855947000 | 0.643691000  |
| 1            | 0.767733000  | -1.683440000 | 1.959774000  | 6             | -4.114197000 | -0.750554000 | -1.447523000 |
| 1            | 1.151106000  | -0.825713000 | 3.459881000  | 1             | -4.550276000 | 0.253475000  | -1.585632000 |
| 6            | -0.912093000 | -0.667180000 | 2.847168000  | 6             | -2.623886000 | -0.604889000 | -1.149694000 |
| 6            | -1.737467000 | 0.305902000  | 2.279459000  | 1             | -2.099319000 | -0.086103000 | -1.972348000 |
| 6            | -1.465384000 | -1.603055000 | 3.727424000  | 1             | -2.456064000 | 0.012593000  | -0.250754000 |
| 6            | -3.095423000 | 0.336617000  | 2.595230000  | 1             | -5.884803000 | -1.554501000 | -0.473008000 |
| 6            | -2.821707000 | -1.578038000 | 4.027594000  | 1             | 6.896888000  | 0.709376000  | -1.536473000 |
| 6            | -3.643026000 | -0.603692000 | 3.460940000  | <b>TS1-L3</b> |              |              |              |
| 1            | -1.342576000 | 1.035625000  | 1.560737000  | 7             | -1.552684000 | -1.013209000 | -0.860656000 |
| 1            | -0.820895000 | -2.365052000 | 4.179470000  | 29            | 0.048700000  | 0.080631000  | -0.464807000 |
| 1            | -3.729841000 | 1.105937000  | 2.144912000  | 6             | -1.344661000 | -2.282347000 | -0.931477000 |
| 1            | -3.241124000 | -2.318884000 | 4.713817000  | 7             | 0.940701000  | -1.864267000 | -0.738075000 |
| 1            | -4.709329000 | -0.576620000 | 3.701651000  | 6             | 0.018037000  | -2.753089000 | -0.751744000 |
| 6            | 3.437148000  | -0.884512000 | -0.470428000 | 1             | -2.147488000 | -3.004415000 | -1.146681000 |
| 6            | 4.263821000  | -1.540005000 | -1.591088000 | 1             | 0.204692000  | -3.835736000 | -0.640447000 |
| 1            | 4.180654000  | -2.640645000 | -1.521586000 | 6             | 0.912966000  | 1.684126000  | -0.697431000 |
| 1            | 3.841485000  | -1.241082000 | -2.567533000 | 6             | 1.614977000  | 2.591686000  | -0.159479000 |
| 1            | 3.396705000  | -0.871942000 | 1.690862000  | 6             | 2.361578000  | 3.816784000  | -0.173803000 |
| 6            | 4.003210000  | -1.328055000 | 0.886859000  | 6             | 2.579986000  | 4.597635000  | 0.973152000  |
| 1            | 3.919639000  | -2.426876000 | 0.988350000  | 6             | 2.881223000  | 4.273644000  | -1.401051000 |
| 1            | 6.304967000  | -1.602558000 | -2.282962000 | 6             | 3.290463000  | 5.789160000  | 0.889307000  |
| 6            | 5.729183000  | -1.119156000 | -1.474359000 | 6             | 3.586758000  | 5.465960000  | -1.474880000 |
| 6            | 6.276376000  | -1.562063000 | -0.116290000 | 6             | 3.797953000  | 6.231527000  | -0.329396000 |
| 1            | 6.224944000  | -2.662497000 | -0.024784000 | 1             | 2.181499000  | 4.260099000  | 1.930978000  |
| 1            | 5.860483000  | -1.222863000 | 1.983106000  | 1             | 2.716777000  | 3.667286000  | -2.296155000 |
| 1            | 7.341565000  | -1.283505000 | -0.028570000 | 1             | 3.447434000  | 6.384636000  | 1.793396000  |

|   |              |              |              |              |              |              |              |
|---|--------------|--------------|--------------|--------------|--------------|--------------|--------------|
| 1 | 3.980440000  | 5.801167000  | -2.438811000 | 6            | -4.656848000 | -0.186428000 | -2.899807000 |
| 1 | 4.355687000  | 7.170047000  | -0.387654000 | 6            | -4.584907000 | 1.332444000  | -2.734758000 |
| 7 | 1.802611000  | 1.882613000  | 1.718951000  | 1            | -3.849101000 | 1.757215000  | -3.440514000 |
| 7 | 1.207240000  | 0.916339000  | 2.032552000  | 1            | -5.563187000 | 1.783896000  | -2.979048000 |
| 7 | 0.455241000  | 0.040606000  | 1.477723000  | 6            | -5.230396000 | 1.101568000  | -0.331367000 |
| 6 | -0.165738000 | -0.923016000 | 2.352058000  | 1            | -4.958309000 | 1.351268000  | 0.710054000  |
| 1 | -0.166441000 | -1.901897000 | 1.833706000  | 6            | -4.189460000 | 1.669794000  | -1.296517000 |
| 1 | 0.442848000  | -1.062553000 | 3.265489000  | 1            | -4.125495000 | 2.764568000  | -1.175257000 |
| 6 | -1.586032000 | -0.580703000 | 2.731216000  | 6            | -2.825626000 | 1.053352000  | -0.993586000 |
| 6 | -2.064590000 | 0.728666000  | 2.655560000  | 1            | -2.047974000 | 1.452804000  | -1.670265000 |
| 6 | -2.438457000 | -1.586406000 | 3.197499000  | 1            | -2.499003000 | 1.291932000  | 0.035861000  |
| 6 | -3.370313000 | 1.024131000  | 3.042903000  | 1            | -6.220265000 | 1.552033000  | -0.526603000 |
| 6 | -3.740662000 | -1.292183000 | 3.586269000  | 1            | 6.192776000  | -2.481074000 | -1.339896000 |
| 6 | -4.212686000 | 0.017366000  | 3.507256000  | <b>IC-L3</b> |              |              |              |
| 1 | -1.409098000 | 1.522157000  | 2.281197000  | 7            | -1.588894000 | -1.012125000 | -0.765746000 |
| 1 | -2.070807000 | -2.617300000 | 3.254400000  | 29           | -0.037559000 | 0.143389000  | -0.390915000 |
| 1 | -3.731982000 | 2.055025000  | 2.981924000  | 6            | -1.337350000 | -2.272425000 | -0.825732000 |
| 1 | -4.395365000 | -2.089625000 | 3.948958000  | 7            | 0.949514000  | -1.805905000 | -0.758334000 |
| 1 | -5.236360000 | 0.252249000  | 3.811495000  | 6            | 0.040421000  | -2.701892000 | -0.652407000 |
| 6 | 2.336922000  | -2.215823000 | -0.518067000 | 1            | -2.120660000 | -3.021194000 | -1.021195000 |
| 6 | 2.816988000  | -3.206039000 | -1.592458000 | 1            | 0.246976000  | -3.766150000 | -0.441750000 |
| 1 | 2.215576000  | -4.133087000 | -1.544930000 | 6            | 0.866191000  | 1.690324000  | -0.499271000 |
| 1 | 2.650602000  | -2.758350000 | -2.589154000 | 6            | 1.692779000  | 2.377432000  | 0.277429000  |
| 1 | 2.194358000  | -2.120330000 | 1.632830000  | 6            | 2.375262000  | 3.638858000  | -0.051713000 |
| 6 | 2.536933000  | -2.844545000 | 0.870581000  | 6            | 3.226545000  | 4.264790000  | 0.866243000  |
| 1 | 1.914897000  | -3.755910000 | 0.965605000  | 6            | 2.176873000  | 4.236417000  | -1.305752000 |
| 1 | 4.621278000  | -4.244093000 | -2.156323000 | 6            | 3.861010000  | 5.457669000  | 0.532696000  |
| 6 | 4.294365000  | -3.532437000 | -1.377840000 | 6            | 2.810599000  | 5.426514000  | -1.631813000 |
| 6 | 4.474469000  | -4.163131000 | 0.004358000  | 6            | 3.658307000  | 6.044800000  | -0.712728000 |
| 1 | 3.895490000  | -5.102504000 | 0.072402000  | 1            | 3.381030000  | 3.800510000  | 1.842578000  |
| 1 | 4.140431000  | -3.633915000 | 2.079351000  | 1            | 1.512472000  | 3.746310000  | -2.025337000 |
| 1 | 5.534574000  | -4.428836000 | 0.164157000  | 1            | 4.523822000  | 5.936297000  | 1.259605000  |
| 6 | 4.014375000  | -3.179085000 | 1.081053000  | 1            | 2.644017000  | 5.878595000  | -2.613730000 |
| 6 | 4.843401000  | -1.896731000 | 0.988336000  | 1            | 4.158692000  | 6.982601000  | -0.969112000 |
| 1 | 4.531530000  | -1.184355000 | 1.772793000  | 7            | 2.019270000  | 1.861843000  | 1.585034000  |
| 1 | 5.909766000  | -2.124931000 | 1.165302000  | 7            | 1.441371000  | 0.880372000  | 2.083354000  |
| 6 | 5.120445000  | -2.248852000 | -1.469409000 | 7            | 0.551830000  | 0.154858000  | 1.466467000  |
| 1 | 5.008599000  | -1.796587000 | -2.470968000 | 6            | -0.091547000 | -0.821089000 | 2.309909000  |
| 6 | 4.656678000  | -1.266563000 | -0.393244000 | 1            | -0.105869000 | -1.806880000 | 1.800723000  |
| 1 | 5.243971000  | -0.335214000 | -0.458567000 | 1            | 0.518829000  | -0.955017000 | 3.223019000  |
| 6 | 3.178854000  | -0.939916000 | -0.596505000 | 6            | -1.505040000 | -0.465619000 | 2.700613000  |
| 1 | 2.828682000  | -0.230319000 | 0.175161000  | 6            | -1.986123000 | 0.841150000  | 2.598921000  |
| 1 | 2.998638000  | -0.447997000 | -1.569675000 | 6            | -2.344310000 | -1.455522000 | 3.222745000  |
| 6 | -2.883493000 | -0.467087000 | -1.147454000 | 6            | -3.281289000 | 1.148737000  | 3.012619000  |
| 6 | -3.938044000 | -1.028686000 | -0.183693000 | 6            | -3.633362000 | -1.148046000 | 3.643727000  |
| 1 | -3.987545000 | -2.129901000 | -0.277516000 | 6            | -4.108698000 | 0.158520000  | 3.536286000  |
| 1 | -3.635768000 | -0.796901000 | 0.851948000  | 1            | -1.334171000 | 1.620198000  | 2.188297000  |
| 1 | -2.517355000 | -0.417744000 | -3.281181000 | 1            | -1.973142000 | -2.483653000 | 3.304721000  |
| 6 | -3.291267000 | -0.802191000 | -2.591756000 | 1            | -3.644453000 | 2.177910000  | 2.931561000  |
| 1 | -3.332681000 | -1.899794000 | -2.723872000 | 1            | -4.275011000 | -1.932442000 | 4.055162000  |
| 1 | -6.048417000 | -0.831938000 | 0.204948000  | 1            | -5.121936000 | 0.404230000  | 3.866064000  |
| 6 | -5.303764000 | -0.416559000 | -0.496988000 | 6            | 2.354057000  | -2.135884000 | -0.548166000 |
| 6 | -5.698391000 | -0.756974000 | -1.934936000 | 6            | 2.807240000  | -3.157061000 | -1.606766000 |
| 1 | -5.773729000 | -1.852744000 | -2.060537000 | 1            | 2.208965000  | -4.082766000 | -1.510956000 |
| 1 | -4.935557000 | -0.436103000 | -3.938661000 | 1            | 2.608546000  | -2.741301000 | -2.611397000 |
| 1 | -6.694907000 | -0.339436000 | -2.164705000 | 1            | 2.280739000  | -1.969087000 | 1.602355000  |

|               |              |              |              |   |              |              |              |
|---------------|--------------|--------------|--------------|---|--------------|--------------|--------------|
| 6             | 2.599263000  | -2.718167000 | 0.853579000  | 6 | 3.519310000  | 4.041891000  | 0.491930000  |
| 1             | 1.988485000  | -3.629565000 | 1.001880000  | 6 | 1.772416000  | 4.219794000  | -1.163560000 |
| 1             | 4.596972000  | -4.205793000 | -2.192550000 | 6 | 4.104751000  | 5.197236000  | -0.016314000 |
| 6             | 4.291531000  | -3.471131000 | -1.426739000 | 6 | 2.362543000  | 5.369972000  | -1.667063000 |
| 6             | 4.516297000  | -4.056557000 | -0.031404000 | 6 | 3.534027000  | 5.865779000  | -1.095672000 |
| 1             | 3.944098000  | -4.995585000 | 0.083770000  | 1 | 3.960932000  | 3.513426000  | 1.339699000  |
| 1             | 4.242879000  | -3.462829000 | 2.034950000  | 1 | 0.846727000  | 3.834740000  | -1.603527000 |
| 1             | 5.581977000  | -4.313323000 | 0.103921000  | 1 | 5.021740000  | 5.581409000  | 0.440089000  |
| 6             | 4.084448000  | -3.040611000 | 1.027152000  | 1 | 1.902146000  | 5.890617000  | -2.511546000 |
| 6             | 4.901936000  | -1.757373000 | 0.869877000  | 1 | 3.997679000  | 6.774195000  | -1.489778000 |
| 1             | 4.604642000  | -1.021372000 | 1.638100000  | 7 | 2.303254000  | 1.784374000  | 1.620688000  |
| 1             | 5.974531000  | -1.972653000 | 1.023568000  | 7 | 1.726075000  | 0.795162000  | 2.133233000  |
| 6             | 5.108017000  | -2.187643000 | -1.583980000 | 7 | 0.673978000  | 0.288793000  | 1.545791000  |
| 1             | 4.963957000  | -1.767871000 | -2.595631000 | 6 | -0.045183000 | -0.674326000 | 2.347316000  |
| 6             | 4.671408000  | -1.174745000 | -0.525675000 | 1 | -0.099555000 | -1.654400000 | 1.824752000  |
| 1             | 5.250526000  | -0.242811000 | -0.638446000 | 1 | 0.537889000  | -0.852322000 | 3.271067000  |
| 6             | 3.186033000  | -0.860313000 | -0.691252000 | 6 | -1.447290000 | -0.250931000 | 2.711053000  |
| 1             | 2.864416000  | -0.138417000 | 0.078834000  | 6 | -1.911929000 | 1.045944000  | 2.486148000  |
| 1             | 2.972097000  | -0.396564000 | -1.671378000 | 6 | -2.294849000 | -1.174510000 | 3.333069000  |
| 6             | -2.934467000 | -0.511831000 | -1.075204000 | 6 | -3.199515000 | 1.408755000  | 2.879626000  |
| 6             | -3.967580000 | -1.053164000 | -0.078792000 | 6 | -3.575432000 | -0.809941000 | 3.733253000  |
| 1             | -3.983471000 | -2.158899000 | -0.117795000 | 6 | -4.034773000 | 0.486766000  | 3.504468000  |
| 1             | -3.666845000 | -0.760733000 | 0.941291000  | 1 | -1.253603000 | 1.771569000  | 1.995030000  |
| 1             | -2.577873000 | -0.554212000 | -3.210875000 | 1 | -1.936001000 | -2.194331000 | 3.513714000  |
| 6             | -3.338211000 | -0.925558000 | -2.499300000 | 1 | -3.549598000 | 2.430255000  | 2.701404000  |
| 1             | -3.352824000 | -2.028379000 | -2.581285000 | 1 | -4.221712000 | -1.541880000 | 4.226021000  |
| 1             | -6.080604000 | -0.894847000 | 0.310133000  | 1 | -5.040928000 | 0.777624000  | 3.818989000  |
| 6             | -5.350526000 | -0.494484000 | -0.415080000 | 6 | 2.337128000  | -2.101963000 | -0.533482000 |
| 6             | -5.742364000 | -0.913702000 | -1.832629000 | 6 | 2.796851000  | -3.202217000 | -1.505946000 |
| 1             | -5.788836000 | -2.015778000 | -1.905145000 | 1 | 2.236055000  | -4.135957000 | -1.313527000 |
| 1             | -4.996926000 | -0.669839000 | -3.854024000 | 1 | 2.564026000  | -2.886774000 | -2.539573000 |
| 1             | -6.750784000 | -0.534610000 | -2.076258000 | 1 | 2.302841000  | -1.760275000 | 1.602845000  |
| 6             | -4.721323000 | -0.362451000 | -2.830047000 | 6 | 2.629297000  | -2.553705000 | 0.906957000  |
| 6             | -4.690342000 | 1.163823000  | -2.738553000 | 1 | 2.052805000  | -3.471005000 | 1.137251000  |
| 1             | -3.970939000 | 1.574548000  | -3.469215000 | 1 | 4.605948000  | -4.245898000 | -2.038670000 |
| 1             | -5.681891000 | 1.576553000  | -2.996943000 | 6 | 4.295773000  | -3.453265000 | -1.335098000 |
| 6             | -5.315150000 | 1.031292000  | -0.321044000 | 6 | 4.573960000  | -3.900139000 | 0.101276000  |
| 1             | -5.040965000 | 1.335973000  | 0.705391000  | 1 | 4.040108000  | -4.843965000 | 0.317129000  |
| 6             | -4.296603000 | 1.580026000  | -1.321104000 | 1 | 4.321996000  | -3.128902000 | 2.111209000  |
| 1             | -4.261023000 | 2.680582000  | -1.251960000 | 1 | 5.651484000  | -4.106056000 | 0.229641000  |
| 6             | -2.914683000 | 1.015463000  | -0.995582000 | 6 | 4.127983000  | -2.807165000 | 1.073147000  |
| 1             | -2.152468000 | 1.402064000  | -1.697663000 | 6 | 4.889535000  | -1.511763000 | 0.783690000  |
| 1             | -2.593446000 | 1.315045000  | 0.019336000  | 1 | 4.561010000  | -0.717316000 | 1.479184000  |
| 1             | -6.317290000 | 1.447503000  | -0.528396000 | 1 | 5.971313000  | -1.664790000 | 0.946364000  |
| 1             | 6.184853000  | -2.411191000 | -1.479481000 | 6 | 5.070300000  | -2.167697000 | -1.627498000 |
| <b>TS2-L3</b> |              |              |              | 1 | 4.894908000  | -1.846374000 | -2.669934000 |
| 7             | -1.627220000 | -1.098990000 | -0.698146000 | 6 | 4.622915000  | -1.074613000 | -0.657558000 |
| 29            | -0.038565000 | 0.041020000  | -0.366530000 | 1 | 5.168692000  | -0.139555000 | -0.867960000 |
| 6             | -1.351506000 | -2.355349000 | -0.745143000 | 6 | 3.126526000  | -0.824392000 | -0.820397000 |
| 7             | 0.917225000  | -1.817001000 | -0.728106000 | 1 | 2.798918000  | -0.041298000 | -0.117956000 |
| 6             | 0.036663000  | -2.740986000 | -0.571939000 | 1 | 2.879961000  | -0.470413000 | -1.838103000 |
| 1             | -2.113628000 | -3.125258000 | -0.942150000 | 6 | -2.969238000 | -0.616134000 | -1.038168000 |
| 1             | 0.287216000  | -3.788821000 | -0.336861000 | 6 | -3.984059000 | -1.062346000 | 0.022420000  |
| 6             | 0.693813000  | 1.685364000  | -0.147825000 | 1 | -4.006227000 | -2.168250000 | 0.069918000  |
| 6             | 1.720875000  | 2.309881000  | 0.444189000  | 1 | -3.655012000 | -0.693576000 | 1.008537000  |
| 6             | 2.344315000  | 3.537034000  | -0.079364000 | 1 | -2.665394000 | -0.839999000 | -3.171282000 |

|             |              |              |              |              |              |              |              |
|-------------|--------------|--------------|--------------|--------------|--------------|--------------|--------------|
| 6           | -3.412012000 | -1.140644000 | -2.413102000 | 1            | 4.215801000  | 2.318278000  | -2.568275000 |
| 1           | -3.446874000 | -2.245611000 | -2.407507000 | 1            | 4.096845000  | -1.767093000 | -3.930270000 |
| 1           | -6.085419000 | -0.845233000 | 0.445572000  | 1            | 5.406806000  | 0.247711000  | -3.273903000 |
| 6           | -5.368467000 | -0.515137000 | -0.326643000 | 6            | -2.798577000 | -1.703168000 | 0.330669000  |
| 6           | -5.799114000 | -1.042433000 | -1.696101000 | 6            | -3.618295000 | -2.906286000 | 0.796814000  |
| 1           | -5.860159000 | -2.146026000 | -1.678107000 | 1            | -3.229100000 | -3.834970000 | 0.336663000  |
| 1           | -5.099437000 | -0.974550000 | -3.746985000 | 1            | -3.525203000 | -3.017664000 | 1.894510000  |
| 1           | -6.808583000 | -0.670546000 | -1.946475000 | 1            | -2.296106000 | -0.727043000 | -1.534701000 |
| 6           | -4.796024000 | -0.587683000 | -2.758430000 | 6            | -2.903092000 | -1.589742000 | -1.202999000 |
| 6           | -4.746027000 | 0.939985000  | -2.793787000 | 1            | -2.474548000 | -2.502432000 | -1.659044000 |
| 1           | -4.039441000 | 1.280036000  | -3.571861000 | 1            | -5.667819000 | -3.584029000 | 0.749400000  |
| 1           | -5.738689000 | 1.343021000  | -3.063041000 | 6            | -5.084783000 | -2.714432000 | 0.399078000  |
| 6           | -5.314049000 | 1.012787000  | -0.359456000 | 6            | -5.182700000 | -2.608541000 | -1.124004000 |
| 1           | -5.012137000 | 1.397373000  | 0.631586000  | 1            | -4.813157000 | -3.537681000 | -1.595102000 |
| 6           | -4.314155000 | 1.465451000  | -1.424600000 | 1            | -4.422778000 | -1.335559000 | -2.705813000 |
| 1           | -4.265842000 | 2.567542000  | -1.445974000 | 1            | -6.238921000 | -2.494462000 | -1.426081000 |
| 6           | -2.931563000 | 0.912347000  | -1.083891000 | 6            | -4.366066000 | -1.409374000 | -1.605959000 |
| 1           | -2.179810000 | 1.231220000  | -1.830039000 | 6            | -4.908102000 | -0.126142000 | -0.973836000 |
| 1           | -2.582370000 | 1.289206000  | -0.104959000 | 1            | -4.325107000 | 0.745146000  | -1.323530000 |
| 1           | -6.316499000 | 1.422906000  | -0.577276000 | 1            | -5.954897000 | 0.036072000  | -1.286346000 |
| 1           | 6.154939000  | -2.351580000 | -1.526794000 | 6            | -5.631919000 | -1.434872000 | 1.034544000  |
| <b>P-L3</b> |              |              |              | 1            | -5.583809000 | -1.505799000 | 2.136277000  |
| 7           | 1.208432000  | -1.544303000 | 0.940337000  | 6            | -4.820463000 | -0.233126000 | 0.548988000  |
| 29          | 0.017586000  | -0.281091000 | 0.006891000  | 1            | -5.205314000 | 0.692473000  | 1.009310000  |
| 6           | 0.642804000  | -2.593529000 | 1.413008000  | 6            | -3.359805000 | -0.413849000 | 0.950773000  |
| 7           | -1.394623000 | -1.745586000 | 0.669539000  | 1            | -2.745498000 | 0.436369000  | 0.600294000  |
| 6           | -0.786016000 | -2.763026000 | 1.142768000  | 1            | -3.253050000 | -0.465401000 | 2.050002000  |
| 1           | 1.174541000  | -3.343998000 | 2.014384000  | 6            | 2.583676000  | -1.170181000 | 1.231562000  |
| 1           | -1.269583000 | -3.726338000 | 1.370095000  | 6            | 3.349758000  | -1.087866000 | -0.098115000 |
| 6           | -0.534371000 | 1.224684000  | -0.994732000 | 1            | 3.362522000  | -2.085785000 | -0.575457000 |
| 6           | -1.104894000 | 2.455349000  | -0.631334000 | 1            | 2.799925000  | -0.405560000 | -0.775644000 |
| 6           | -1.388130000 | 2.980647000  | 0.698057000  | 1            | 2.759791000  | -2.177934000 | 3.145383000  |
| 6           | -2.025553000 | 4.223721000  | 0.848004000  | 6            | 3.315241000  | -2.107658000 | 2.190197000  |
| 6           | -1.043191000 | 2.274815000  | 1.862778000  | 1            | 3.364463000  | -3.126534000 | 1.760364000  |
| 6           | -2.306391000 | 4.732124000  | 2.109381000  | 1            | 5.306353000  | -0.543461000 | -0.805665000 |
| 6           | -1.328884000 | 2.784729000  | 3.123558000  | 6            | 4.768536000  | -0.582161000 | 0.157032000  |
| 6           | -1.962612000 | 4.018238000  | 3.256468000  | 6            | 5.491459000  | -1.527186000 | 1.116810000  |
| 1           | -2.293561000 | 4.777754000  | -0.055623000 | 1            | 5.565502000  | -2.537521000 | 0.675060000  |
| 1           | -0.537295000 | 1.302773000  | 1.774169000  | 1            | 5.246731000  | -2.272062000 | 3.137896000  |
| 1           | -2.802578000 | 5.702999000  | 2.200836000  | 1            | 6.524709000  | -1.177145000 | 1.289882000  |
| 1           | -1.049274000 | 2.214251000  | 4.014296000  | 6            | 4.732221000  | -1.586130000 | 2.442768000  |
| 1           | -2.185051000 | 4.421643000  | 4.247991000  | 6            | 4.662744000  | -0.186777000 | 3.055875000  |
| 7           | -1.392368000 | 3.177921000  | -1.751313000 | 1            | 4.133464000  | -0.220760000 | 4.025313000  |
| 7           | -1.054161000 | 2.506360000  | -2.791424000 | 1            | 5.682652000  | 0.183927000  | 3.261333000  |
| 7           | -0.550554000 | 1.331281000  | -2.349603000 | 6            | 4.698415000  | 0.818442000  | 0.765915000  |
| 6           | 0.008081000  | 0.408420000  | -3.293391000 | 1            | 4.184879000  | 1.504060000  | 0.067117000  |
| 1           | -0.411526000 | -0.599545000 | -3.121967000 | 6            | 3.941808000  | 0.758064000  | 2.093796000  |
| 1           | -0.328760000 | 0.738813000  | -4.290860000 | 1            | 3.877499000  | 1.767347000  | 2.535008000  |
| 6           | 1.514061000  | 0.351721000  | -3.238455000 | 6            | 2.526579000  | 0.242009000  | 1.841971000  |
| 6           | 2.254708000  | 1.472291000  | -2.850167000 | 1            | 1.942607000  | 0.208083000  | 2.781040000  |
| 6           | 2.189122000  | -0.810649000 | -3.614527000 | 1            | 1.985949000  | 0.910388000  | 1.140537000  |
| 6           | 3.645785000  | 1.431123000  | -2.860047000 | 1            | 5.715926000  | 1.217041000  | 0.927078000  |
| 6           | 3.581056000  | -0.851662000 | -3.626189000 | 1            | -6.696891000 | -1.311417000 | 0.768438000  |
| 6           | 4.313426000  | 0.272882000  | -3.255481000 | <b>Ac-L4</b> |              |              |              |
| 1           | 1.728962000  | 2.384863000  | -2.549031000 | 29           | 0.844122000  | 0.000139000  | 0.005597000  |
| 1           | 1.612976000  | -1.695296000 | -3.907393000 | 6            | 3.919470000  | 0.004895000  | 0.006421000  |



|              |              |              |              |    |              |              |              |
|--------------|--------------|--------------|--------------|----|--------------|--------------|--------------|
| 6            | 2.687377000  | 0.006749000  | 0.012486000  | 6  | 0.879197000  | -3.243826000 | 1.545022000  |
| 15           | -1.338176000 | -0.005791000 | 0.003571000  | 1  | 2.065469000  | -2.357489000 | -0.028406000 |
| 6            | -2.070617000 | -1.108948000 | -1.236635000 | 6  | -1.428750000 | -3.704149000 | 1.009973000  |
| 6            | -1.424604000 | -1.204968000 | -2.481529000 | 1  | -2.040616000 | -3.227298000 | -1.013614000 |
| 6            | -3.252538000 | -1.835402000 | -1.020542000 | 6  | -0.375459000 | -3.723756000 | 1.920383000  |
| 6            | -1.958009000 | -2.000643000 | -3.488342000 | 1  | 1.705294000  | -3.240218000 | 2.261209000  |
| 1            | -0.484274000 | -0.659511000 | -2.643137000 | 1  | -2.418831000 | -4.062506000 | 1.305848000  |
| 6            | -3.778930000 | -2.634085000 | -2.034583000 | 1  | -0.535409000 | -4.105319000 | 2.933077000  |
| 1            | -3.758542000 | -1.784437000 | -0.044974000 | 6  | 0.282434000  | -2.337491000 | -2.094192000 |
| 6            | -3.127607000 | -2.712659000 | -3.264331000 | 1  | -0.670469000 | -2.324453000 | -2.648771000 |
| 1            | -1.440101000 | -2.073711000 | -4.450249000 | 1  | 0.945079000  | -3.056928000 | -2.607874000 |
| 1            | -4.692692000 | -3.203852000 | -1.851966000 | 15 | -1.497958000 | 0.682607000  | 0.042585000  |
| 1            | -3.545653000 | -3.347639000 | -4.059808000 | 6  | -1.995361000 | 0.450580000  | 1.774935000  |
| 6            | -2.075139000 | 1.619970000  | -0.343473000 | 6  | -1.238671000 | -0.441471000 | 2.540182000  |
| 6            | -1.409403000 | 2.757324000  | 0.164155000  | 6  | -3.108738000 | 1.081873000  | 2.341670000  |
| 6            | -3.271524000 | 1.776976000  | -1.052504000 | 6  | -1.604907000 | -0.720833000 | 3.853506000  |
| 6            | -1.939852000 | 4.023450000  | -0.036706000 | 1  | -0.347273000 | -0.902626000 | 2.095814000  |
| 1            | -0.456940000 | 2.632267000  | 0.693781000  | 6  | -3.464325000 | 0.808739000  | 3.658313000  |
| 6            | -3.804032000 | 3.053339000  | -1.250351000 | 1  | -3.695871000 | 1.793705000  | 1.749547000  |
| 1            | -3.787199000 | 0.903165000  | -1.462190000 | 6  | -2.716474000 | -0.095754000 | 4.411890000  |
| 6            | -3.135338000 | 4.168458000  | -0.734585000 | 1  | -1.007851000 | -1.418723000 | 4.447593000  |
| 1            | -1.417514000 | 4.904898000  | 0.352443000  | 1  | -4.329751000 | 1.307488000  | 4.103245000  |
| 1            | -4.737603000 | 3.171506000  | -1.807998000 | 1  | -2.998302000 | -0.304313000 | 5.447776000  |
| 1            | -3.554845000 | 5.169270000  | -0.895002000 | 6  | -2.710212000 | -0.309583000 | -0.894948000 |
| 6            | -2.077091000 | -0.518578000 | 1.591204000  | 6  | -2.515036000 | -0.399792000 | -2.279919000 |
| 6            | -3.324247000 | -0.048405000 | 2.024437000  | 6  | -3.769316000 | -1.007295000 | -0.305285000 |
| 6            | -1.361493000 | -1.447826000 | 2.366984000  | 6  | -3.364617000 | -1.175542000 | -3.061276000 |
| 6            | -3.857449000 | -0.510983000 | 3.229095000  | 1  | -1.670881000 | 0.132172000  | -2.739050000 |
| 1            | -3.876489000 | 0.689344000  | 1.427915000  | 6  | -4.616165000 | -1.786248000 | -1.091661000 |
| 6            | -1.901677000 | -1.904798000 | 3.567822000  | 1  | -3.924729000 | -0.959785000 | 0.777406000  |
| 1            | -0.375235000 | -1.797087000 | 2.034843000  | 6  | -4.415356000 | -1.874113000 | -2.466553000 |
| 6            | -3.147030000 | -1.438268000 | 3.991121000  | 1  | -3.205826000 | -1.239356000 | -4.141627000 |
| 1            | -4.830937000 | -0.137940000 | 3.564777000  | 1  | -5.440027000 | -2.332066000 | -0.623299000 |
| 1            | -1.341785000 | -2.626226000 | 4.173974000  | 1  | -5.080315000 | -2.488541000 | -3.079625000 |
| 1            | -3.568436000 | -1.796216000 | 4.939847000  | 6  | -1.960020000 | 2.399143000  | -0.363699000 |
| 6            | 5.338203000  | -0.001696000 | 0.002539000  | 6  | -3.238977000 | 2.757046000  | -0.807910000 |
| 6            | 6.064492000  | 1.207663000  | 0.021779000  | 6  | -0.983980000 | 3.390723000  | -0.197924000 |
| 6            | 6.056749000  | -1.212060000 | -0.030592000 | 6  | -3.537751000 | 4.090651000  | -1.071002000 |
| 6            | 7.452594000  | 1.195972000  | 0.022509000  | 1  | -4.004360000 | 1.986254000  | -0.954288000 |
| 1            | 5.517096000  | 2.147858000  | 0.047854000  | 6  | -1.290434000 | 4.722288000  | -0.457773000 |
| 6            | 7.444891000  | -1.213809000 | -0.034651000 | 1  | 0.023726000  | 3.103265000  | 0.128596000  |
| 1            | 5.502342000  | -2.151365000 | -0.048430000 | 6  | -2.565987000 | 5.072712000  | -0.894191000 |
| 6            | 8.153819000  | -0.009081000 | -0.015311000 | 1  | -4.537057000 | 4.364886000  | -1.420142000 |
| 1            | 8.001737000  | 2.142815000  | 0.034960000  | 1  | -0.523516000 | 5.490575000  | -0.328385000 |
| 1            | 7.986968000  | -2.160763000 | -0.061366000 | 1  | -2.802754000 | 6.119021000  | -1.106222000 |
| 1            | 9.247106000  | -0.015049000 | -0.019667000 | 6  | 5.102960000  | 0.638870000  | 0.300270000  |
| <b>RC-L4</b> |              |              |              | 6  | 5.934391000  | 0.296456000  | -0.785023000 |
| 29           | 0.635337000  | 0.290679000  | -0.255723000 | 6  | 5.716026000  | 1.053150000  | 1.499389000  |
| 6            | 3.690061000  | 0.565655000  | 0.183783000  | 6  | 7.316111000  | 0.367682000  | -0.671598000 |
| 6            | 2.460244000  | 0.514521000  | 0.091637000  | 1  | 5.464939000  | -0.024487000 | -1.719609000 |
| 7            | 3.018269000  | -0.650955000 | -3.037105000 | 6  | 7.098782000  | 1.119703000  | 1.604525000  |
| 7            | 0.869129000  | -0.991883000 | -2.140734000 | 1  | 5.079867000  | 1.322986000  | 2.346554000  |
| 7            | 1.992201000  | -0.892955000 | -2.638024000 | 6  | 7.907361000  | 0.778120000  | 0.521995000  |
| 6            | 0.038393000  | -2.773089000 | -0.674070000 | 1  | 7.942695000  | 0.098870000  | -1.527134000 |
| 6            | 1.084471000  | -2.757195000 | 0.257819000  | 1  | 7.553956000  | 1.444302000  | 2.544897000  |
| 6            | -1.219183000 | -3.236119000 | -0.285502000 | 1  | 8.995948000  | 0.832410000  | 0.608124000  |

**TS1-L4**

|    |              |              |              |
|----|--------------|--------------|--------------|
| 29 | 0.794022000  | 0.104412000  | -0.220108000 |
| 6  | 3.767105000  | 0.064116000  | -0.081381000 |
| 6  | 2.575095000  | 0.441973000  | 0.120122000  |
| 7  | 3.491771000  | -1.575320000 | -1.152050000 |
| 7  | 1.194223000  | -1.520961000 | -1.267424000 |
| 7  | 2.401725000  | -1.919588000 | -1.430144000 |
| 6  | -0.660147000 | -2.999114000 | -0.650072000 |
| 6  | -0.034855000 | -3.526796000 | 0.485639000  |
| 6  | -2.053143000 | -3.033504000 | -0.732364000 |
| 6  | -0.790154000 | -4.090589000 | 1.509192000  |
| 1  | 1.057171000  | -3.488958000 | 0.562996000  |
| 6  | -2.812204000 | -3.580135000 | 0.300100000  |
| 1  | -2.548072000 | -2.616715000 | -1.618615000 |
| 6  | -2.182200000 | -4.115318000 | 1.420511000  |
| 1  | -0.289051000 | -4.510715000 | 2.386027000  |
| 1  | -3.903966000 | -3.588011000 | 0.225769000  |
| 1  | -2.776417000 | -4.552685000 | 2.228033000  |
| 6  | 0.163754000  | -2.413690000 | -1.768758000 |
| 1  | -0.502970000 | -1.856172000 | -2.450645000 |
| 1  | 0.625902000  | -3.218546000 | -2.366775000 |
| 15 | -1.258454000 | 0.879996000  | -0.005669000 |
| 6  | -1.955184000 | 0.591805000  | 1.648425000  |
| 6  | -1.778457000 | -0.691685000 | 2.179496000  |
| 6  | -2.686738000 | 1.543931000  | 2.364542000  |
| 6  | -2.347075000 | -1.026687000 | 3.402765000  |
| 1  | -1.184543000 | -1.427883000 | 1.624217000  |
| 6  | -3.242257000 | 1.206279000  | 3.596491000  |
| 1  | -2.818178000 | 2.554493000  | 1.963972000  |
| 6  | -3.079323000 | -0.077043000 | 4.112757000  |
| 1  | -2.205091000 | -2.033994000 | 3.805965000  |
| 1  | -3.807865000 | 1.954399000  | 4.158743000  |
| 1  | -3.518591000 | -0.335558000 | 5.080237000  |
| 6  | -2.565788000 | 0.253688000  | -1.117764000 |
| 6  | -2.264942000 | 0.190852000  | -2.484738000 |
| 6  | -3.817817000 | -0.180271000 | -0.670229000 |
| 6  | -3.196903000 | -0.305388000 | -3.389516000 |
| 1  | -1.279567000 | 0.526038000  | -2.834382000 |
| 6  | -4.747952000 | -0.680398000 | -1.579418000 |
| 1  | -4.064299000 | -0.145246000 | 0.396500000  |
| 6  | -4.439506000 | -0.747336000 | -2.935662000 |
| 1  | -2.952417000 | -0.352867000 | -4.454262000 |
| 1  | -5.724135000 | -1.021509000 | -1.223196000 |
| 1  | -5.170636000 | -1.144738000 | -3.644921000 |
| 6  | -1.333492000 | 2.683831000  | -0.264751000 |
| 6  | -2.521679000 | 3.329732000  | -0.631408000 |
| 6  | -0.170336000 | 3.437433000  | -0.065746000 |
| 6  | -2.545493000 | 4.711923000  | -0.785011000 |
| 1  | -3.433015000 | 2.744355000  | -0.800044000 |
| 6  | -0.201492000 | 4.820539000  | -0.219230000 |
| 1  | 0.762861000  | 2.924961000  | 0.200316000  |
| 6  | -1.386315000 | 5.457357000  | -0.578094000 |
| 1  | -3.474694000 | 5.211294000  | -1.072897000 |
| 1  | 0.710769000  | 5.403332000  | -0.066281000 |
| 1  | -1.406425000 | 6.543272000  | -0.705730000 |
| 6  | 5.189133000  | 0.172481000  | 0.094505000  |

|   |             |              |              |
|---|-------------|--------------|--------------|
| 6 | 6.114365000 | -0.352504000 | -0.821038000 |
| 6 | 5.675085000 | 0.855203000  | 1.225391000  |
| 6 | 7.478693000 | -0.195244000 | -0.608015000 |
| 1 | 5.749328000 | -0.881144000 | -1.702941000 |
| 6 | 7.039024000 | 1.006935000  | 1.429593000  |
| 1 | 4.955118000 | 1.260139000  | 1.941945000  |
| 6 | 7.949093000 | 0.481521000  | 0.514168000  |
| 1 | 8.186609000 | -0.607038000 | -1.332940000 |
| 1 | 7.397108000 | 1.539000000  | 2.315484000  |
| 1 | 9.023855000 | 0.600290000  | 0.675897000  |

**IC-L4**

|    |              |              |              |
|----|--------------|--------------|--------------|
| 29 | 0.801922000  | 0.099179000  | -0.279425000 |
| 6  | 3.681935000  | -0.301561000 | -0.347675000 |
| 6  | 2.565867000  | 0.334094000  | -0.018635000 |
| 7  | 3.582512000  | -1.506192000 | -1.121700000 |
| 7  | 1.332597000  | -1.472717000 | -1.274604000 |
| 7  | 2.503118000  | -1.990848000 | -1.498419000 |
| 6  | -0.545747000 | -2.935597000 | -0.654967000 |
| 6  | 0.113688000  | -3.488255000 | 0.449276000  |
| 6  | -1.939577000 | -2.999738000 | -0.711351000 |
| 6  | -0.610312000 | -4.094081000 | 1.471830000  |
| 1  | 1.206571000  | -3.436808000 | 0.499205000  |
| 6  | -2.666621000 | -3.588778000 | 0.320576000  |
| 1  | -2.460569000 | -2.576220000 | -1.579220000 |
| 6  | -2.003392000 | -4.139737000 | 1.414067000  |
| 1  | -0.082808000 | -4.532599000 | 2.323943000  |
| 1  | -3.759358000 | -3.618744000 | 0.266622000  |
| 1  | -2.572116000 | -4.608729000 | 2.222187000  |
| 6  | 0.239529000  | -2.293442000 | -1.769748000 |
| 1  | -0.443194000 | -1.675396000 | -2.379925000 |
| 1  | 0.658773000  | -3.065608000 | -2.439098000 |
| 15 | -1.272750000 | 0.856530000  | -0.011128000 |
| 6  | -1.918020000 | 0.540282000  | 1.657648000  |
| 6  | -1.646462000 | -0.718414000 | 2.206934000  |
| 6  | -2.712204000 | 1.449937000  | 2.363397000  |
| 6  | -2.184027000 | -1.072809000 | 3.439384000  |
| 1  | -1.004148000 | -1.420099000 | 1.660701000  |
| 6  | -3.235800000 | 1.093897000  | 3.603255000  |
| 1  | -2.917755000 | 2.441938000  | 1.947533000  |
| 6  | -2.978648000 | -0.166792000 | 4.138163000  |
| 1  | -1.968790000 | -2.061018000 | 3.856840000  |
| 1  | -3.850406000 | 1.808482000  | 4.157551000  |
| 1  | -3.393761000 | -0.440531000 | 5.112103000  |
| 6  | -2.597540000 | 0.239701000  | -1.102651000 |
| 6  | -2.339511000 | 0.229346000  | -2.479691000 |
| 6  | -3.820035000 | -0.245259000 | -0.627619000 |
| 6  | -3.284639000 | -0.270132000 | -3.368461000 |
| 1  | -1.378129000 | 0.607522000  | -2.851155000 |
| 6  | -4.763991000 | -0.746008000 | -1.521847000 |
| 1  | -4.029849000 | -0.254122000 | 0.447372000  |
| 6  | -4.497198000 | -0.764413000 | -2.888314000 |
| 1  | -3.073305000 | -0.279807000 | -4.441142000 |
| 1  | -5.716858000 | -1.128549000 | -1.145437000 |
| 1  | -5.238016000 | -1.165136000 | -3.585493000 |
| 6  | -1.354248000 | 2.663297000  | -0.241764000 |
| 6  | -0.192893000 | 3.417895000  | -0.036296000 |

|               |              |              |              |             |              |              |              |
|---------------|--------------|--------------|--------------|-------------|--------------|--------------|--------------|
| 6             | -2.545886000 | 3.311064000  | -0.593317000 | 6           | 3.231360000  | -0.348399000 | 3.402321000  |
| 6             | -0.228671000 | 4.802931000  | -0.166572000 | 1           | 1.392330000  | 0.641658000  | 2.848186000  |
| 1             | 0.744395000  | 2.906176000  | 0.215899000  | 6           | 4.699856000  | -0.946462000 | 1.583040000  |
| 6             | -2.574577000 | 4.695616000  | -0.724033000 | 1           | 4.021708000  | -0.443382000 | -0.402968000 |
| 1             | -3.455790000 | 2.725488000  | -0.768489000 | 6           | 4.415881000  | -0.926279000 | 2.945694000  |
| 6             | -1.417369000 | 5.441531000  | -0.509443000 | 1           | 3.006987000  | -0.326809000 | 4.472143000  |
| 1             | 0.682319000  | 5.386240000  | -0.008490000 | 1           | 5.630978000  | -1.394289000 | 1.224828000  |
| 1             | -3.506609000 | 5.196374000  | -0.999916000 | 1           | 5.121408000  | -1.361343000 | 3.658699000  |
| 1             | -1.441626000 | 6.529293000  | -0.618766000 | 6           | 1.393413000  | 2.620371000  | 0.285899000  |
| 6             | 5.063154000  | 0.078448000  | -0.009025000 | 6           | 0.238266000  | 3.377295000  | 0.054297000  |
| 6             | 6.149963000  | -0.691845000 | -0.436223000 | 6           | 2.565036000  | 3.260497000  | 0.710687000  |
| 6             | 5.304618000  | 1.229892000  | 0.754220000  | 6           | 0.259926000  | 4.757038000  | 0.231822000  |
| 6             | 7.447289000  | -0.313809000 | -0.105065000 | 1           | -0.684027000 | 2.870942000  | -0.257064000 |
| 1             | 5.959164000  | -1.588171000 | -1.030338000 | 6           | 2.580058000  | 4.640128000  | 0.888282000  |
| 6             | 6.600358000  | 1.602231000  | 1.081421000  | 1           | 3.468898000  | 2.672434000  | 0.907799000  |
| 1             | 4.452656000  | 1.830810000  | 1.089363000  | 6           | 1.429291000  | 5.388027000  | 0.647982000  |
| 6             | 7.679840000  | 0.830668000  | 0.652328000  | 1           | -0.646512000 | 5.341519000  | 0.053662000  |
| 1             | 8.289625000  | -0.923421000 | -0.444601000 | 1           | 3.496065000  | 5.135308000  | 1.221767000  |
| 1             | 6.772768000  | 2.502643000  | 1.677640000  | 1           | 1.442681000  | 6.471516000  | 0.794876000  |
| 1             | 8.701525000  | 1.123191000  | 0.909613000  | 6           | -4.992575000 | 0.077467000  | -0.018961000 |
| <b>TS2-L4</b> |              |              |              | 6           | -6.170240000 | -0.258226000 | 0.659093000  |
| 29            | -0.727557000 | 0.058286000  | 0.149474000  | 6           | -5.068404000 | 0.923722000  | -1.134517000 |
| 6             | -3.694839000 | -0.450558000 | 0.440720000  | 6           | -7.392652000 | 0.247638000  | 0.229315000  |
| 6             | -2.515788000 | -0.074020000 | -0.064874000 | 1           | -6.106451000 | -0.920412000 | 1.525276000  |
| 7             | -3.762299000 | -1.404074000 | 1.474411000  | 6           | -6.290881000 | 1.426285000  | -1.557567000 |
| 7             | -1.554527000 | -1.447395000 | 1.352734000  | 1           | -4.149025000 | 1.177520000  | -1.672320000 |
| 7             | -2.666749000 | -1.877326000 | 1.863139000  | 6           | -7.460292000 | 1.090590000  | -0.876377000 |
| 6             | 0.339355000  | -2.840105000 | 0.609171000  | 1           | -8.306334000 | -0.020950000 | 0.767379000  |
| 6             | -0.353866000 | -3.295553000 | -0.518803000 | 1           | -6.334794000 | 2.083381000  | -2.430670000 |
| 6             | 1.725134000  | -3.014065000 | 0.666921000  | 1           | -8.423796000 | 1.485066000  | -1.210593000 |
| 6             | 0.327899000  | -3.928164000 | -1.555329000 | <b>P-L4</b> |              |              |              |
| 1             | -1.437148000 | -3.145004000 | -0.577281000 | 7           | 2.429440000  | -2.840905000 | -0.694866000 |
| 6             | 2.409124000  | -3.628624000 | -0.378465000 | 7           | 3.724925000  | -3.201032000 | -0.698992000 |
| 1             | 2.272373000  | -2.660171000 | 1.550214000  | 7           | 4.409697000  | -2.136195000 | -0.466712000 |
| 6             | 1.710801000  | -4.094224000 | -1.490561000 | 6           | 2.238888000  | -1.512905000 | -0.462543000 |
| 1             | -0.227281000 | -4.291864000 | -2.424849000 | 6           | 3.561555000  | -1.084307000 | -0.305639000 |
| 1             | 3.495414000  | -3.748561000 | -0.320264000 | 29          | 0.528233000  | -0.693010000 | -0.365164000 |
| 1             | 2.245129000  | -4.586423000 | -2.308291000 | 6           | 1.416724000  | -3.824516000 | -0.988213000 |
| 6             | -0.387390000 | -2.206630000 | 1.768742000  | 1           | 1.192727000  | -3.836953000 | -2.069411000 |
| 1             | 0.320079000  | -1.557250000 | 2.319266000  | 1           | 1.848898000  | -4.807567000 | -0.738774000 |
| 1             | -0.722556000 | -2.984621000 | 2.479693000  | 6           | 0.157318000  | -3.554851000 | -0.209805000 |
| 15            | 1.324939000  | 0.823297000  | -0.002293000 | 6           | -1.075469000 | -3.425898000 | -0.854478000 |
| 6             | 2.031364000  | 0.545026000  | -1.651685000 | 6           | 0.215665000  | -3.381455000 | 1.179339000  |
| 6             | 1.715304000  | -0.670563000 | -2.268202000 | 6           | -2.230335000 | -3.132576000 | -0.129745000 |
| 6             | 2.917800000  | 1.431269000  | -2.271757000 | 6           | -0.932808000 | -3.077021000 | 1.900805000  |
| 6             | 2.299146000  | -1.008593000 | -3.484304000 | 6           | -2.159250000 | -2.947334000 | 1.246852000  |
| 1             | 1.001086000  | -1.349986000 | -1.786695000 | 1           | -1.126272000 | -3.549107000 | -1.941959000 |
| 6             | 3.486687000  | 1.094315000  | -3.496677000 | 1           | 1.184521000  | -3.461213000 | 1.684334000  |
| 1             | 3.159459000  | 2.390023000  | -1.800365000 | 1           | -3.188520000 | -3.020258000 | -0.649230000 |
| 6             | 3.184194000  | -0.125761000 | -4.098887000 | 1           | -0.874510000 | -2.939857000 | 2.984792000  |
| 1             | 2.049767000  | -1.963780000 | -3.955920000 | 1           | -3.063207000 | -2.705915000 | 1.814466000  |
| 1             | 4.172844000  | 1.790731000  | -3.986346000 | 6           | 4.059189000  | 0.255519000  | -0.014815000 |
| 1             | 3.635883000  | -0.384987000 | -5.060457000 | 6           | 5.388743000  | 0.596632000  | -0.306870000 |
| 6             | 2.605233000  | 0.166709000  | 1.119942000  | 6           | 3.237020000  | 1.234301000  | 0.565316000  |
| 6             | 2.330851000  | 0.195532000  | 2.493959000  | 6           | 5.865064000  | 1.876900000  | -0.053639000 |
| 6             | 3.800102000  | -0.402094000 | 0.668737000  | 6           | 3.712331000  | 2.518378000  | 0.806842000  |

|              |              |              |              |              |              |              |              |
|--------------|--------------|--------------|--------------|--------------|--------------|--------------|--------------|
| 6            | 5.029519000  | 2.848812000  | 0.494540000  | 1            | -7.199347000 | 1.719235000  | 1.216653000  |
| 1            | 6.035547000  | -0.170493000 | -0.741785000 | 1            | -7.320703000 | -1.957104000 | -1.022054000 |
| 1            | 2.212547000  | 0.967211000  | 0.857588000  | 1            | -8.512031000 | -0.091841000 | 0.120670000  |
| 1            | 6.903928000  | 2.123564000  | -0.292046000 | 6            | 2.092273000  | 2.443388000  | -0.723981000 |
| 1            | 3.052960000  | 3.263397000  | 1.262699000  | 1            | 2.453702000  | 2.325104000  | -1.762368000 |
| 1            | 5.407155000  | 3.856088000  | 0.690306000  | 1            | 0.988713000  | 2.349059000  | -0.752634000 |
| 15           | -1.203908000 | 0.622840000  | -0.123135000 | 6            | 4.017334000  | -0.575731000 | -1.791833000 |
| 6            | -1.380812000 | 1.138203000  | 1.613099000  | 1            | 4.093078000  | -0.354390000 | -2.867537000 |
| 6            | -2.242857000 | 2.178244000  | 1.984294000  | 1            | 4.497878000  | 0.265258000  | -1.257220000 |
| 1            | -2.831127000 | 2.698261000  | 1.218576000  | 6            | 4.038045000  | -0.332578000 | 1.692824000  |
| 6            | -0.621349000 | 0.487322000  | 2.591832000  | 1            | 4.807346000  | -0.088131000 | 0.936698000  |
| 1            | 0.066379000  | -0.316497000 | 2.296141000  | 1            | 3.793921000  | 0.607308000  | 2.214419000  |
| 6            | -0.730646000 | 0.867174000  | 3.927744000  | 6            | 2.515860000  | 3.758775000  | -0.137192000 |
| 1            | -0.129363000 | 0.361399000  | 4.687742000  | 1            | 2.135846000  | 3.867144000  | 0.887817000  |
| 6            | -1.594690000 | 1.895712000  | 4.289532000  | 1            | 3.611450000  | 3.839416000  | -0.106275000 |
| 1            | -1.676111000 | 2.196885000  | 5.337586000  | 1            | 2.127160000  | 4.591163000  | -0.738200000 |
| 6            | -2.350916000 | 2.551862000  | 3.318004000  | 6            | 4.662867000  | -1.897577000 | -1.463626000 |
| 1            | -3.023791000 | 3.364732000  | 3.604017000  | 1            | 4.598231000  | -2.122081000 | -0.388862000 |
| 6            | 0.301385000  | 2.595827000  | -1.359623000 | 1            | 4.162654000  | -2.712700000 | -2.004561000 |
| 6            | -1.000982000 | 2.173355000  | -1.062694000 | 1            | 5.722557000  | -1.893130000 | -1.754034000 |
| 1            | 1.157554000  | 1.973278000  | -1.068992000 | 6            | 4.519173000  | -1.393284000 | 2.641054000  |
| 6            | 0.511298000  | 3.796016000  | -2.031093000 | 1            | 4.772499000  | -2.318437000 | 2.103498000  |
| 1            | 1.531694000  | 4.115829000  | -2.258005000 | 1            | 5.413144000  | -1.051772000 | 3.179549000  |
| 6            | -0.574594000 | 4.575526000  | -2.420843000 | 1            | 3.741054000  | -1.634774000 | 3.377918000  |
| 1            | -0.409242000 | 5.515032000  | -2.955370000 | <b>RC-L5</b> |              |              |              |
| 1            | -2.726022000 | 4.761795000  | -2.457105000 | 7            | -0.005673000 | -2.193879000 | -0.661862000 |
| 6            | -1.873204000 | 4.154418000  | -2.141900000 | 7            | 1.088999000  | -2.774498000 | -0.691828000 |
| 6            | -2.089534000 | 2.957986000  | -1.466002000 | 7            | 2.159844000  | -3.121908000 | -0.679944000 |
| 1            | -3.113294000 | 2.624069000  | -1.260526000 | 6            | 2.035646000  | 0.057822000  | -0.204170000 |
| 6            | -2.852187000 | 0.038529000  | -0.629495000 | 6            | 3.263954000  | 0.042918000  | -0.075705000 |
| 6            | -3.896675000 | -0.194560000 | 0.268290000  | 29           | 0.174162000  | -0.114308000 | -0.423000000 |
| 1            | -3.767164000 | 0.028783000  | 1.332357000  | 6            | -1.196465000 | -3.028350000 | -0.853348000 |
| 6            | -3.026077000 | -0.274359000 | -1.985254000 | 1            | -1.420777000 | -3.119338000 | -1.931216000 |
| 1            | -2.204611000 | -0.099423000 | -2.691297000 | 1            | -0.993604000 | -4.050817000 | -0.483627000 |
| 6            | -4.227910000 | -0.807109000 | -2.434013000 | 6            | -2.379226000 | -2.441379000 | -0.138220000 |
| 1            | -4.356128000 | -1.045526000 | -3.493328000 | 6            | -3.642585000 | -2.501422000 | -0.726816000 |
| 6            | -5.266813000 | -1.041501000 | -1.532599000 | 6            | -2.244453000 | -1.862661000 | 1.126512000  |
| 1            | -6.211314000 | -1.465086000 | -1.884582000 | 6            | -4.756805000 | -1.999210000 | -0.063172000 |
| 6            | -5.099180000 | -0.734715000 | -0.185579000 | 6            | -3.355827000 | -1.345007000 | 1.783297000  |
| 1            | -5.912266000 | -0.916482000 | 0.522695000  | 6            | -4.614535000 | -1.415603000 | 1.192836000  |
| <b>Ac-L5</b> |              |              |              | 1            | -3.751005000 | -2.941356000 | -1.723758000 |
| 29           | -0.110971000 | -0.256497000 | -0.042546000 | 1            | -1.252447000 | -1.802627000 | 1.591087000  |
| 6            | -3.187205000 | -0.206165000 | 0.020232000  | 1            | -5.742482000 | -2.057368000 | -0.533707000 |
| 6            | -1.956090000 | -0.233249000 | -0.002559000 | 1            | -3.236882000 | -0.875852000 | 2.763917000  |
| 15           | 2.025306000  | -0.096611000 | -0.092903000 | 1            | -5.488329000 | -1.015128000 | 1.714828000  |
| 8            | 2.866965000  | -0.826303000 | 1.050715000  | 6            | 4.675876000  | 0.025821000  | 0.071942000  |
| 8            | 2.630669000  | 1.394602000  | 0.074845000  | 6            | 5.391635000  | -1.185806000 | -0.002799000 |
| 8            | 2.627055000  | -0.599115000 | -1.489983000 | 6            | 5.402208000  | 1.211657000  | 0.296977000  |
| 6            | -4.605444000 | -0.176202000 | 0.046952000  | 6            | 6.772095000  | -1.205395000 | 0.141070000  |
| 6            | -5.295512000 | 0.870730000  | 0.688991000  | 6            | 6.782850000  | 1.183337000  | 0.439905000  |
| 6            | -5.363552000 | -1.191861000 | -0.567948000 | 6            | 7.476075000  | -0.023117000 | 0.363106000  |
| 6            | -6.683163000 | 0.897105000  | 0.712463000  | 1            | 4.833375000  | -2.110224000 | -0.177997000 |
| 1            | -4.715765000 | 1.663036000  | 1.169724000  | 1            | 4.856922000  | 2.157317000  | 0.356441000  |
| 6            | -6.750948000 | -1.158019000 | -0.538984000 | 1            | 7.308257000  | -2.156878000 | 0.079272000  |
| 1            | -4.836919000 | -2.008675000 | -1.068306000 | 1            | 7.327601000  | 2.115888000  | 0.613828000  |
| 6            | -7.419209000 | -0.115261000 | 0.099922000  | 1            | 8.563369000  | -0.041984000 | 0.475990000  |

|               |              |              |              |              |              |              |              |
|---------------|--------------|--------------|--------------|--------------|--------------|--------------|--------------|
| 1             | -3.887224000 | 2.975521000  | 0.373663000  | 1            | 8.423601000  | 0.244157000  | 0.486571000  |
| 6             | -4.612295000 | 2.196295000  | 0.099568000  | 1            | -4.328364000 | 2.534320000  | 0.338804000  |
| 1             | -4.746939000 | 1.538264000  | 0.971370000  | 6            | -4.910714000 | 1.652612000  | 0.036113000  |
| 1             | -5.571475000 | 2.682285000  | -0.129143000 | 1            | -4.960189000 | 0.967026000  | 0.895365000  |
| 6             | -4.137887000 | 1.405357000  | -1.091859000 | 1            | -5.929408000 | 1.981445000  | -0.213792000 |
| 8             | -3.010258000 | 0.591195000  | -0.812242000 | 6            | -4.285632000 | 0.966311000  | -1.150082000 |
| 1             | -4.910114000 | 0.698465000  | -1.435302000 | 8            | -3.048865000 | 0.339745000  | -0.846746000 |
| 1             | -3.896352000 | 2.072212000  | -1.938760000 | 1            | -4.923265000 | 0.148366000  | -1.521293000 |
| 8             | -1.473837000 | 2.572283000  | -0.915457000 | 1            | -4.131075000 | 1.674629000  | -1.983543000 |
| 6             | -0.391067000 | 2.922418000  | -1.772700000 | 8            | -1.825182000 | 2.533295000  | -0.888089000 |
| 1             | -0.037961000 | 2.025503000  | -2.317734000 | 6            | -0.798949000 | 3.034817000  | -1.737426000 |
| 1             | -0.807543000 | 3.617321000  | -2.518016000 | 1            | -0.309305000 | 2.197868000  | -2.272407000 |
| 6             | 0.737491000  | 3.542760000  | -0.994511000 | 1            | -1.302543000 | 3.656260000  | -2.493610000 |
| 1             | 1.512911000  | 3.922224000  | -1.674641000 | 6            | 0.212729000  | 3.821314000  | -0.948502000 |
| 1             | 0.372834000  | 4.382709000  | -0.384665000 | 1            | 0.943760000  | 4.297341000  | -1.616845000 |
| 1             | 1.213981000  | 2.794623000  | -0.339039000 | 1            | -0.280734000 | 4.608594000  | -0.359684000 |
| 15            | -1.597646000 | 1.089432000  | -0.275470000 | 1            | 0.769768000  | 3.158029000  | -0.266485000 |
| 8             | -1.973972000 | 1.457277000  | 1.254729000  | 15           | -1.749605000 | 1.039303000  | -0.265591000 |
| 6             | -0.931971000 | 1.899931000  | 2.113645000  | 8            | -2.210641000 | 1.332423000  | 1.254677000  |
| 1             | -1.385827000 | 2.642124000  | 2.788409000  | 6            | -1.275315000 | 1.925593000  | 2.142923000  |
| 1             | -0.157981000 | 2.431178000  | 1.525314000  | 1            | -1.861008000 | 2.564151000  | 2.821997000  |
| 6             | -0.329261000 | 0.750983000  | 2.879801000  | 1            | -0.596647000 | 2.597034000  | 1.580471000  |
| 1             | -1.109754000 | 0.183357000  | 3.408999000  | 6            | -0.499580000 | 0.879616000  | 2.901458000  |
| 1             | 0.393005000  | 1.115525000  | 3.623665000  | 1            | -1.182730000 | 0.179576000  | 3.405502000  |
| 1             | 0.218076000  | 0.068363000  | 2.206901000  | 1            | 0.138111000  | 1.345886000  | 3.665651000  |
| <b>TS1-L5</b> |              |              |              | 1            | 0.162195000  | 0.305384000  | 2.230366000  |
| 7             | 0.412635000  | -1.885838000 | -0.594831000 | <b>IC-L5</b> |              |              |              |
| 7             | 1.586088000  | -2.399931000 | -0.551557000 | 7            | 0.530655000  | -1.797744000 | -0.743374000 |
| 7             | 2.701942000  | -2.056290000 | -0.402610000 | 7            | 1.649944000  | -2.454305000 | -0.698581000 |
| 6             | 1.994075000  | 0.355090000  | -0.198801000 | 7            | 2.768915000  | -1.973277000 | -0.473749000 |
| 6             | 3.140977000  | -0.183513000 | -0.158802000 | 6            | 1.982514000  | 0.240371000  | -0.266480000 |
| 29            | 0.182923000  | 0.071873000  | -0.395049000 | 6            | 3.023953000  | -0.574739000 | -0.244122000 |
| 6             | -0.647547000 | -2.840922000 | -0.891835000 | 29           | 0.199213000  | 0.098827000  | -0.455185000 |
| 1             | -0.844370000 | -2.874280000 | -1.979980000 | 6            | -0.591717000 | -2.642795000 | -1.130435000 |
| 1             | -0.309596000 | -3.854739000 | -0.610960000 | 1            | -0.847576000 | -2.465734000 | -2.192050000 |
| 6             | -1.928957000 | -2.512386000 | -0.177305000 | 1            | -0.259158000 | -3.694290000 | -1.069682000 |
| 6             | -3.153884000 | -2.768654000 | -0.796432000 | 6            | -1.830774000 | -2.441641000 | -0.300539000 |
| 6             | -1.926557000 | -1.976647000 | 1.113706000  | 6            | -3.082058000 | -2.702731000 | -0.865121000 |
| 6             | -4.351938000 | -2.495081000 | -0.146076000 | 6            | -1.771078000 | -2.015488000 | 1.028647000  |
| 6             | -3.124229000 | -1.683729000 | 1.758823000  | 6            | -4.247762000 | -2.528009000 | -0.129468000 |
| 6             | -4.340157000 | -1.942272000 | 1.132466000  | 6            | -2.939055000 | -1.818158000 | 1.760912000  |
| 1             | -3.163542000 | -3.179206000 | -1.811851000 | 6            | -4.180454000 | -2.070175000 | 1.185313000  |
| 1             | -0.968563000 | -1.774689000 | 1.607630000  | 1            | -3.137810000 | -3.032852000 | -1.908174000 |
| 1             | -5.302951000 | -2.706574000 | -0.643882000 | 1            | -0.793285000 | -1.823237000 | 1.485620000  |
| 1             | -3.108875000 | -1.247094000 | 2.761796000  | 1            | -5.218516000 | -2.740750000 | -0.587299000 |
| 1             | -5.280631000 | -1.718669000 | 1.644409000  | 1            | -2.878754000 | -1.466487000 | 2.795136000  |
| 6             | 4.568379000  | -0.118479000 | 0.005545000  | 1            | -5.096190000 | -1.921073000 | 1.764674000  |
| 6             | 5.441593000  | -1.123881000 | -0.436696000 | 6            | 4.439164000  | -0.256711000 | -0.005588000 |
| 6             | 5.114071000  | 1.022008000  | 0.624570000  | 6            | 5.415369000  | -1.258435000 | -0.002000000 |
| 6             | 6.813763000  | -0.986819000 | -0.262414000 | 6            | 4.825430000  | 1.071523000  | 0.224581000  |
| 6             | 6.484858000  | 1.149601000  | 0.794206000  | 6            | 6.748234000  | -0.932806000 | 0.227672000  |
| 6             | 7.343191000  | 0.144413000  | 0.352266000  | 6            | 6.155899000  | 1.390513000  | 0.453759000  |
| 1             | 5.033282000  | -2.011221000 | -0.921918000 | 6            | 7.124921000  | 0.387633000  | 0.456265000  |
| 1             | 4.434149000  | 1.804729000  | 0.972334000  | 1            | 5.110909000  | -2.291859000 | -0.181654000 |
| 1             | 7.481084000  | -1.778089000 | -0.615479000 | 1            | 4.059140000  | 1.853875000  | 0.219330000  |
| 1             | 6.888924000  | 2.042639000  | 1.279154000  | 1            | 7.504058000  | -1.723339000 | 0.228127000  |

|               |              |              |              |             |              |              |              |
|---------------|--------------|--------------|--------------|-------------|--------------|--------------|--------------|
| 1             | 6.443003000  | 2.430605000  | 0.631511000  | 1           | 7.349946000  | -1.383121000 | 1.091352000  |
| 1             | 8.174012000  | 0.637789000  | 0.636203000  | 1           | 6.166617000  | 2.576947000  | -0.117228000 |
| 1             | -4.348922000 | 2.449215000  | 0.551342000  | 1           | 7.905043000  | 1.019250000  | 0.754385000  |
| 6             | -4.914058000 | 1.561408000  | 0.234135000  | 1           | -4.335188000 | 2.361752000  | 0.866165000  |
| 1             | -4.900787000 | 0.835896000  | 1.061471000  | 6           | -4.898172000 | 1.477358000  | 0.535650000  |
| 1             | -5.953579000 | 1.864469000  | 0.045271000  | 1           | -4.804194000 | 0.704333000  | 1.312970000  |
| 6             | -4.322976000 | 0.952090000  | -1.009743000 | 1           | -5.956448000 | 1.758463000  | 0.440828000  |
| 8             | -3.055338000 | 0.349933000  | -0.790160000 | 6           | -4.383961000 | 0.961703000  | -0.782210000 |
| 1             | -4.951111000 | 0.132138000  | -1.392152000 | 8           | -3.087561000 | 0.387017000  | -0.690767000 |
| 1             | -4.224297000 | 1.702274000  | -1.814458000 | 1           | -5.015791000 | 0.146661000  | -1.168691000 |
| 8             | -1.857055000 | 2.564084000  | -0.788473000 | 1           | -4.363600000 | 1.760580000  | -1.544656000 |
| 6             | -0.878482000 | 3.093496000  | -1.676312000 | 8           | -1.944923000 | 2.631829000  | -0.602923000 |
| 1             | -0.423597000 | 2.275121000  | -2.267854000 | 6           | -1.048461000 | 3.242698000  | -1.524639000 |
| 1             | -1.420547000 | 3.742235000  | -2.380977000 | 1           | -0.678947000 | 2.489761000  | -2.247259000 |
| 6             | 0.177278000  | 3.849933000  | -0.916179000 | 1           | -1.644329000 | 3.973527000  | -2.091690000 |
| 1             | 0.876481000  | 4.343541000  | -1.605432000 | 6           | 0.098625000  | 3.895315000  | -0.800995000 |
| 1             | -0.280605000 | 4.620302000  | -0.278506000 | 1           | 0.741304000  | 4.446438000  | -1.501567000 |
| 1             | 0.763545000  | 3.164361000  | -0.282180000 | 1           | -0.271437000 | 4.601864000  | -0.043493000 |
| 15            | -1.753345000 | 1.049566000  | -0.226431000 | 1           | 0.724701000  | 3.136449000  | -0.301670000 |
| 8             | -2.157109000 | 1.281895000  | 1.317076000  | 15          | -1.771694000 | 1.084644000  | -0.161454000 |
| 6             | -1.199407000 | 1.864441000  | 2.190302000  | 8           | -2.073824000 | 1.199627000  | 1.416621000  |
| 1             | -1.767358000 | 2.498730000  | 2.888087000  | 6           | -1.072765000 | 1.748048000  | 2.263549000  |
| 1             | -0.532283000 | 2.540055000  | 1.618583000  | 1           | -1.609019000 | 2.292419000  | 3.055743000  |
| 6             | -0.410972000 | 0.807474000  | 2.918648000  | 1           | -0.482690000 | 2.502123000  | 1.705349000  |
| 1             | -1.085497000 | 0.105369000  | 3.430633000  | 6           | -0.188254000 | 0.670339000  | 2.834512000  |
| 1             | 0.246298000  | 1.263358000  | 3.672329000  | 1           | -0.793335000 | -0.103629000 | 3.329593000  |
| 1             | 0.231022000  | 0.237657000  | 2.225833000  | 1           | 0.506405000  | 1.089795000  | 3.575619000  |
|               |              |              |              | 1           | 0.420664000  | 0.188947000  | 2.050039000  |
| <b>TS2-L5</b> |              |              |              | <b>P-L5</b> |              |              |              |
| 7             | 0.706491000  | -1.831721000 | -0.832891000 | 7           | -1.685110000 | -2.546460000 | 0.531486000  |
| 7             | 1.682469000  | -2.643463000 | -0.564706000 | 7           | -2.926434000 | -3.037514000 | 0.691227000  |
| 7             | 2.824204000  | -2.198422000 | -0.296489000 | 7           | -3.744843000 | -2.077647000 | 0.439361000  |
| 6             | 1.936590000  | -0.020456000 | -0.658219000 | 6           | -1.667859000 | -1.230576000 | 0.174788000  |
| 6             | 2.979272000  | -0.801487000 | -0.358379000 | 6           | -3.039874000 | -0.960015000 | 0.115210000  |
| 29            | 0.144648000  | 0.193172000  | -0.586544000 | 6           | -0.064584000 | -0.259300000 | -0.145771000 |
| 6             | -0.480368000 | -2.517230000 | -1.325975000 | 6           | -0.562398000 | -3.389626000 | 0.862531000  |
| 1             | -0.729994000 | -2.137600000 | -2.333771000 | 1           | -0.349569000 | -3.332785000 | 1.944918000  |
| 1             | -0.213507000 | -3.581388000 | -1.458063000 | 1           | -0.874054000 | -4.427434000 | 0.657503000  |
| 6             | -1.698610000 | -2.402586000 | -0.445498000 | 6           | 0.671303000  | -3.020203000 | 0.086851000  |
| 6             | -2.959577000 | -2.661282000 | -0.990614000 | 6           | 1.878610000  | -2.771545000 | 0.740704000  |
| 6             | -1.606805000 | -2.065650000 | 0.906374000  | 6           | 0.624329000  | -2.895073000 | -1.309616000 |
| 6             | -4.104495000 | -2.573086000 | -0.209328000 | 6           | 3.018868000  | -2.402975000 | 0.023206000  |
| 6             | -2.756444000 | -1.952222000 | 1.685303000  | 6           | 1.756404000  | -2.524902000 | -2.024605000 |
| 6             | -4.007559000 | -2.203546000 | 1.131766000  | 6           | 2.958585000  | -2.279943000 | -1.359352000 |
| 1             | -3.039620000 | -2.925354000 | -2.050833000 | 1           | 1.922537000  | -2.864925000 | 1.831995000  |
| 1             | -0.619149000 | -1.882459000 | 1.345030000  | 1           | -0.325168000 | -3.069208000 | -1.827351000 |
| 1             | -5.083087000 | -2.786381000 | -0.649959000 | 1           | 3.960161000  | -2.218603000 | 0.551509000  |
| 1             | -2.672209000 | -1.669852000 | 2.739049000  | 1           | 1.702785000  | -2.421740000 | -3.111551000 |
| 1             | -4.907931000 | -2.124540000 | 1.747882000  | 1           | 3.846160000  | -1.983483000 | -1.925646000 |
| 6             | 4.332844000  | -0.299804000 | -0.061883000 | 6           | -3.715850000 | 0.287753000  | -0.221937000 |
| 6             | 5.315624000  | -1.170716000 | 0.422929000  | 6           | -5.068508000 | 0.469317000  | 0.104782000  |
| 6             | 4.655604000  | 1.051182000  | -0.253826000 | 6           | -3.047141000 | 1.331826000  | -0.878945000 |
| 6             | 6.589524000  | -0.693949000 | 0.713090000  | 6           | -5.717218000 | 1.660355000  | -0.196394000 |
| 6             | 5.927857000  | 1.521394000  | 0.039935000  | 6           | -3.696529000 | 2.525334000  | -1.172660000 |
| 6             | 6.901637000  | 0.649777000  | 0.525833000  | 6           | -5.035838000 | 2.698363000  | -0.829535000 |
| 1             | 5.060534000  | -2.223085000 | 0.565583000  | 1           | -5.594914000 | -0.349324000 | 0.603157000  |
| 1             | 3.891577000  | 1.729111000  | -0.648222000 |             |              |              |              |

|    |              |              |              |
|----|--------------|--------------|--------------|
| 1  | -2.003466000 | 1.187476000  | -1.186169000 |
| 1  | -6.771419000 | 1.783095000  | 0.068976000  |
| 1  | -3.156949000 | 3.322919000  | -1.692289000 |
| 1  | -5.549650000 | 3.634161000  | -1.065523000 |
| 1  | 4.061352000  | 2.836296000  | -0.214571000 |
| 6  | 4.333173000  | 2.559057000  | -1.243104000 |
| 1  | 3.777136000  | 3.210427000  | -1.931833000 |
| 1  | 5.407690000  | 2.749000000  | -1.373964000 |
| 6  | 4.030374000  | 1.108381000  | -1.516714000 |
| 8  | 2.637226000  | 0.820045000  | -1.524686000 |
| 1  | 4.385154000  | 0.806007000  | -2.513278000 |
| 1  | 4.518726000  | 0.450213000  | -0.774143000 |
| 8  | 2.672219000  | 0.969196000  | 0.986561000  |
| 6  | 2.402833000  | 0.271899000  | 2.194185000  |
| 1  | 1.389176000  | -0.179153000 | 2.147207000  |
| 1  | 3.118631000  | -0.564243000 | 2.269345000  |
| 6  | 2.543779000  | 1.208861000  | 3.362919000  |
| 1  | 2.394034000  | 0.669850000  | 4.308272000  |
| 1  | 3.546512000  | 1.658831000  | 3.381395000  |
| 1  | 1.805244000  | 2.022983000  | 3.318846000  |
| 15 | 1.668904000  | 1.011264000  | -0.282738000 |
| 8  | 1.377046000  | 2.594147000  | -0.393892000 |
| 6  | 0.927276000  | 3.346954000  | 0.719655000  |
| 1  | 0.687709000  | 4.343964000  | 0.322134000  |
| 1  | 1.773732000  | 3.472749000  | 1.422545000  |
| 6  | -0.270678000 | 2.743340000  | 1.413447000  |
| 1  | -1.099779000 | 2.562220000  | 0.710368000  |
| 1  | -0.635957000 | 3.418495000  | 2.200329000  |
| 1  | -0.035502000 | 1.777694000  | 1.895374000  |

## MN12L Optimized Cartesian Coordinates for binuclear catalytic cycle components

| <b>Ac-L1</b> |              |              |              |
|--------------|--------------|--------------|--------------|
| 7            | -0.766315000 | -2.757281000 | 1.117134000  |
| 29           | 0.199608000  | -1.049749000 | 0.898917000  |
| 6            | -0.017523000 | -3.740715000 | 1.446073000  |
| 7            | 1.825661000  | -2.298729000 | 1.413380000  |
| 6            | 1.421005000  | -3.496653000 | 1.571921000  |
| 1            | -0.427518000 | -4.746084000 | 1.629245000  |
| 1            | 2.104220000  | -4.332801000 | 1.793611000  |
| 6            | 0.674739000  | 0.757082000  | 0.517526000  |
| 6            | 1.620165000  | 1.563211000  | 0.490524000  |
| 6            | 2.790857000  | 2.353482000  | 0.431867000  |
| 6            | 3.200905000  | 3.135484000  | 1.529917000  |
| 6            | 3.616716000  | 2.303816000  | -0.712125000 |
| 6            | 4.402729000  | 3.828582000  | 1.485582000  |
| 6            | 4.812350000  | 3.005863000  | -0.748161000 |
| 6            | 5.211111000  | 3.766079000  | 0.351138000  |
| 1            | 2.562865000  | 3.179738000  | 2.416520000  |
| 1            | 3.303605000  | 1.692564000  | -1.566050000 |
| 1            | 4.714693000  | 4.427774000  | 2.345056000  |
| 1            | 5.444181000  | 2.959622000  | -1.639091000 |
| 1            | 6.155766000  | 4.315243000  | 0.322347000  |
| 6            | 3.225696000  | -1.968105000 | 1.500174000  |
| 1            | 3.515245000  | -2.107658000 | -0.643657000 |
| 1            | 3.814665000  | -2.887456000 | 1.717463000  |
| 6            | 3.698514000  | -1.380841000 | 0.168552000  |
| 1            | 3.074495000  | -0.491877000 | -0.047433000 |
| 1            | 3.070253000  | -1.362321000 | 3.575440000  |
| 6            | 3.457691000  | -0.959343000 | 2.625368000  |
| 1            | 2.871291000  | -0.047164000 | 2.395876000  |
| 6            | 4.940656000  | -0.633128000 | 2.721199000  |
| 1            | 5.116709000  | 0.070367000  | 3.549659000  |
| 1            | 5.499430000  | -1.553060000 | 2.978141000  |
| 6            | 5.169874000  | -0.994082000 | 0.240899000  |
| 1            | 5.472280000  | -0.526821000 | -0.712130000 |
| 1            | 5.782658000  | -1.910167000 | 0.338806000  |
| 6            | 5.459334000  | -0.060943000 | 1.410313000  |
| 1            | 4.976447000  | 0.916835000  | 1.233342000  |
| 1            | 6.540028000  | 0.139885000  | 1.475967000  |
| 6            | -2.194703000 | -2.940011000 | 0.965188000  |
| 1            | -2.647655000 | -1.997251000 | 2.865295000  |
| 1            | -2.472851000 | -3.962472000 | 1.299522000  |
| 6            | -2.944509000 | -1.912820000 | 1.807160000  |
| 1            | -2.614501000 | -0.908537000 | 1.463072000  |
| 1            | -2.010758000 | -3.502178000 | -1.120332000 |
| 6            | -2.574163000 | -2.779876000 | -0.505463000 |
| 1            | -2.246645000 | -1.765949000 | -0.818147000 |

|              |              |              |              |    |              |              |              |
|--------------|--------------|--------------|--------------|----|--------------|--------------|--------------|
| 6            | -4.075441000 | -2.941476000 | -0.694214000 | 1  | -4.343996000 | -3.200193000 | 1.608888000  |
| 1            | -4.335337000 | -2.818696000 | -1.758082000 | 1  | -2.893018000 | -4.745575000 | 0.129717000  |
| 1            | -4.366198000 | -3.975949000 | -0.432012000 | 6  | 0.695443000  | -0.636339000 | 0.920268000  |
| 6            | -4.448188000 | -2.070032000 | 1.634693000  | 6  | 1.792774000  | -0.740217000 | 1.495193000  |
| 1            | -4.976299000 | -1.319560000 | 2.245104000  | 6  | 3.102523000  | -0.896724000 | 2.005716000  |
| 1            | -4.761266000 | -3.053413000 | 2.032533000  | 6  | 3.854471000  | -2.044182000 | 1.672063000  |
| 6            | -4.852937000 | -1.960273000 | 0.171353000  | 6  | 3.708778000  | 0.107561000  | 2.786575000  |
| 1            | -4.648398000 | -0.932332000 | -0.181661000 | 6  | 5.168194000  | -2.173556000 | 2.097739000  |
| 1            | -5.936859000 | -2.115642000 | 0.055420000  | 6  | 5.025620000  | -0.030881000 | 3.204044000  |
| 7            | -1.089908000 | 0.093039000  | -2.375546000 | 6  | 5.758772000  | -1.166320000 | 2.861184000  |
| 29           | -1.022643000 | 0.617627000  | -0.338866000 | 1  | 3.384325000  | -2.825703000 | 1.063983000  |
| 6            | -2.269335000 | 0.240371000  | -2.840119000 | 1  | 3.128360000  | 0.996914000  | 3.047865000  |
| 7            | -2.919359000 | 1.035917000  | -0.725068000 | 1  | 5.741124000  | -3.066366000 | 1.833352000  |
| 6            | -3.279753000 | 0.787924000  | -1.932314000 | 1  | 5.488507000  | 0.755903000  | 3.805558000  |
| 1            | -2.538747000 | -0.003521000 | -3.881270000 | 1  | 6.795089000  | -1.269029000 | 3.193476000  |
| 1            | -4.292652000 | 0.988052000  | -2.308491000 | 6  | -0.359554000 | -4.134436000 | -0.515119000 |
| 6            | -3.797577000 | 1.651554000  | 0.254780000  | 1  | -0.644229000 | -2.978808000 | -2.337768000 |
| 1            | -2.075307000 | 2.574014000  | 1.182599000  | 1  | -0.824119000 | -5.063639000 | -0.916244000 |
| 1            | -3.890652000 | 0.911175000  | 1.082072000  | 6  | 0.184113000  | -3.297154000 | -1.678529000 |
| 6            | -3.080081000 | 2.874026000  | 0.833488000  | 1  | 0.628327000  | -2.373914000 | -1.249225000 |
| 1            | -2.924595000 | 3.600141000  | 0.012783000  | 1  | 0.410155000  | -5.089723000 | 1.273515000  |
| 1            | -5.715457000 | 1.120343000  | -0.621432000 | 6  | 0.793937000  | -4.505376000 | 0.421482000  |
| 6            | -5.194176000 | 2.010819000  | -0.226621000 | 1  | 1.188144000  | -3.555687000 | 0.837408000  |
| 1            | -5.111433000 | 2.729913000  | -1.065540000 | 6  | 1.882695000  | -5.260324000 | -0.324394000 |
| 6            | -6.000287000 | 2.640030000  | 0.903731000  | 1  | 2.704028000  | -5.509193000 | 0.367002000  |
| 1            | -7.011007000 | 2.892374000  | 0.548334000  | 1  | 1.482992000  | -6.228926000 | -0.679009000 |
| 1            | -6.138201000 | 1.892893000  | 1.708250000  | 6  | 1.251548000  | -4.070499000 | -2.438503000 |
| 6            | -3.897628000 | 3.508118000  | 1.948443000  | 1  | 1.618014000  | -3.470605000 | -3.287982000 |
| 1            | -3.374282000 | 4.394670000  | 2.338267000  | 1  | 0.809196000  | -4.982504000 | -2.882543000 |
| 1            | -3.969823000 | 2.798091000  | 2.793816000  | 6  | 2.395488000  | -4.458916000 | -1.511723000 |
| 6            | -5.296187000 | 3.864970000  | 1.467645000  | 1  | 2.883622000  | -3.536120000 | -1.139184000 |
| 1            | -5.226927000 | 4.640292000  | 0.681804000  | 1  | 3.169356000  | -5.020866000 | -2.057661000 |
| 1            | -5.887079000 | 4.309088000  | 2.283448000  | 6  | -3.575410000 | -0.802172000 | 2.425404000  |
| 6            | 0.013218000  | -0.362355000 | -3.178235000 | 1  | -2.650586000 | -1.695457000 | 4.169126000  |
| 1            | 0.449368000  | 1.645134000  | -3.873288000 | 1  | -4.582861000 | -1.203305000 | 2.668629000  |
| 1            | -0.344722000 | -0.713529000 | -4.172191000 | 6  | -2.750644000 | -0.697099000 | 3.712500000  |
| 6            | 0.973634000  | 0.815502000  | -3.371479000 | 1  | -1.727191000 | -0.378264000 | 3.424767000  |
| 1            | 1.244125000  | 1.177011000  | -2.358750000 | 1  | -4.331144000 | 0.503756000  | 0.870010000  |
| 1            | 0.049079000  | -2.338423000 | -2.272080000 | 6  | -3.717571000 | 0.576445000  | 1.784658000  |
| 6            | 0.746748000  | -1.505405000 | -2.473882000 | 1  | -2.702721000 | 0.902119000  | 1.466752000  |
| 1            | 1.093815000  | -1.121044000 | -1.490665000 | 6  | -4.320078000 | 1.579555000  | 2.757943000  |
| 6            | 1.957421000  | -1.945584000 | -3.282772000 | 1  | -4.412566000 | 2.563298000  | 2.271528000  |
| 1            | 2.459665000  | -2.790405000 | -2.783837000 | 1  | -5.351716000 | 1.269085000  | 3.009410000  |
| 1            | 1.631976000  | -2.327444000 | -4.268941000 | 6  | -3.359718000 | 0.304333000  | 4.681297000  |
| 6            | 2.213915000  | 0.395338000  | -4.143929000 | 1  | -2.746813000 | 0.357184000  | 5.594265000  |
| 1            | 2.895717000  | 1.255201000  | -4.247261000 | 1  | -4.355944000 | -0.052939000 | 5.002779000  |
| 1            | 1.927858000  | 0.112412000  | -5.174216000 | 6  | -3.497495000 | 1.673963000  | 4.034090000  |
| 6            | 2.915584000  | -0.778139000 | -3.475050000 | 1  | -2.491260000 | 2.065666000  | 3.793746000  |
| 1            | 3.290915000  | -0.458939000 | -2.481409000 | 1  | -3.949526000 | 2.392741000  | 4.734863000  |
| 1            | 3.799056000  | -1.086057000 | -4.055620000 | 7  | 1.266987000  | 0.445399000  | -2.233800000 |
| <b>RC-L1</b> |              |              |              | 29 | -0.098323000 | 0.237589000  | -0.619821000 |
| 7            | -2.884489000 | -1.709389000 | 1.533075000  | 6  | 0.639005000  | 0.495170000  | -3.345713000 |
| 29           | -1.044350000 | -1.386291000 | 0.919755000  | 7  | -1.361450000 | 0.307438000  | -2.139358000 |
| 6            | -3.354736000 | -2.870708000 | 1.254459000  | 6  | -0.818898000 | 0.449011000  | -3.294348000 |
| 7            | -1.319043000 | -3.366851000 | 0.229620000  | 1  | 1.153504000  | 0.597466000  | -4.316011000 |
| 6            | -2.506267000 | -3.770735000 | 0.470694000  | 1  | -1.401412000 | 0.545787000  | -4.221824000 |



|               |              |              |              |    |              |              |              |
|---------------|--------------|--------------|--------------|----|--------------|--------------|--------------|
| 6             | -2.799845000 | 0.230348000  | -1.966830000 | 6  | -1.063275000 | -4.184306000 | -0.574670000 |
| 1             | -3.320348000 | 2.097607000  | -2.944948000 | 1  | -2.472336000 | -4.687490000 | 1.096617000  |
| 1             | -2.992047000 | 0.596539000  | -0.936733000 | 1  | -1.317431000 | -5.055646000 | -1.198905000 |
| 6             | -3.646209000 | 1.042722000  | -2.937711000 | 6  | 1.116806000  | -0.368104000 | 0.790648000  |
| 1             | -3.518274000 | 0.660165000  | -3.967875000 | 6  | 2.078791000  | -0.011349000 | 1.545232000  |
| 1             | -2.568977000 | -1.805489000 | -1.312619000 | 6  | 3.484358000  | 0.008761000  | 1.809433000  |
| 6             | -3.216376000 | -1.240983000 | -2.003579000 | 6  | 4.281723000  | -0.952352000 | 1.151239000  |
| 1             | -3.009907000 | -1.627181000 | -3.022253000 | 6  | 4.112324000  | 0.966251000  | 2.623443000  |
| 6             | -4.690092000 | -1.395899000 | -1.666088000 | 6  | 5.658527000  | -0.954382000 | 1.307322000  |
| 1             | -4.982403000 | -2.458286000 | -1.717483000 | 6  | 5.495832000  | 0.961846000  | 2.761409000  |
| 1             | -4.851829000 | -1.083096000 | -0.616132000 | 6  | 6.273029000  | 0.007372000  | 2.110468000  |
| 6             | -5.114589000 | 0.912260000  | -2.550715000 | 1  | 3.787149000  | -1.697059000 | 0.518075000  |
| 1             | -5.741209000 | 1.527905000  | -3.213922000 | 1  | 3.509882000  | 1.716579000  | 3.137369000  |
| 1             | -5.257441000 | 1.318544000  | -1.530244000 | 1  | 6.262322000  | -1.709525000 | 0.797091000  |
| 6             | -5.558392000 | -0.544463000 | -2.582724000 | 1  | 5.974524000  | 1.715870000  | 3.391860000  |
| 1             | -5.479116000 | -0.925289000 | -3.618103000 | 1  | 7.359488000  | 0.009476000  | 2.229581000  |
| 1             | -6.620056000 | -0.633426000 | -2.305428000 | 6  | 0.618092000  | -3.416429000 | -2.109954000 |
| 6             | 2.702511000  | 0.528864000  | -2.183186000 | 1  | -0.451453000 | -1.843977000 | -3.161505000 |
| 1             | 2.639338000  | 2.532477000  | -1.339187000 | 1  | 0.243551000  | -4.231787000 | -2.765892000 |
| 1             | 3.102045000  | 0.833372000  | -3.177200000 | 6  | 0.584155000  | -2.084039000 | -2.864222000 |
| 6             | 3.123314000  | 1.557767000  | -1.135213000 | 1  | 0.903413000  | -1.287741000 | -2.156083000 |
| 1             | 2.752733000  | 1.205423000  | -0.150285000 | 1  | 2.086463000  | -4.665823000 | -1.113463000 |
| 1             | 2.974244000  | -1.582972000 | -2.571303000 | 6  | 2.058276000  | -3.726284000 | -1.689194000 |
| 6             | 3.289355000  | -0.836558000 | -1.820139000 | 1  | 2.373252000  | -2.915529000 | -0.997422000 |
| 1             | 2.843740000  | -1.144118000 | -0.853954000 | 6  | 2.981333000  | -3.773588000 | -2.894856000 |
| 6             | 4.807041000  | -0.762706000 | -1.719813000 | 1  | 4.006000000  | -4.014607000 | -2.572154000 |
| 1             | 5.201937000  | -1.743144000 | -1.402718000 | 1  | 2.670986000  | -4.597827000 | -3.563892000 |
| 1             | 5.227148000  | -0.575941000 | -2.726344000 | 6  | 1.518497000  | -2.110934000 | -4.065828000 |
| 6             | 4.639795000  | 1.675193000  | -1.102427000 | 1  | 1.483999000  | -1.138587000 | -4.584290000 |
| 1             | 4.944606000  | 2.441442000  | -0.373021000 | 1  | 1.158878000  | -2.855770000 | -4.800548000 |
| 1             | 5.001276000  | 2.026628000  | -2.087621000 | 6  | 2.942733000  | -2.455309000 | -3.651617000 |
| 6             | 5.270002000  | 0.331118000  | -0.764966000 | 1  | 3.335784000  | -1.656769000 | -2.992348000 |
| 1             | 4.993583000  | 0.060141000  | 0.269731000  | 1  | 3.605724000  | -2.487127000 | -4.529953000 |
| 1             | 6.368668000  | 0.404587000  | -0.778038000 | 6  | -1.971618000 | -2.513652000 | 2.617357000  |
| 7             | 1.344695000  | 2.601568000  | 1.816927000  | 1  | -0.171256000 | -2.914807000 | 3.761543000  |
| 7             | -0.078222000 | 2.265570000  | -0.027512000 | 1  | -2.559656000 | -3.345721000 | 3.061473000  |
| 7             | 0.683592000  | 2.525421000  | 0.908736000  | 6  | -0.863060000 | -2.077322000 | 3.575422000  |
| 6             | 0.128313000  | 4.676551000  | -0.644759000 | 1  | -0.275676000 | -1.284811000 | 3.064406000  |
| 6             | -0.517761000 | 5.314350000  | 0.420256000  | 1  | -3.704300000 | -1.643718000 | 1.656829000  |
| 6             | 1.188177000  | 5.321738000  | -1.283953000 | 6  | -2.899117000 | -1.325946000 | 2.339162000  |
| 6             | -0.112337000 | 6.577706000  | 0.831889000  | 1  | -2.287954000 | -0.571446000 | 1.797421000  |
| 6             | 1.590677000  | 6.590777000  | -0.875641000 | 6  | -3.462880000 | -0.742046000 | 3.625638000  |
| 1             | 1.697250000  | 4.826632000  | -2.118476000 | 1  | -4.118390000 | 0.113748000  | 3.392373000  |
| 6             | 0.941947000  | 7.218262000  | 0.182597000  | 1  | -4.113951000 | -1.492670000 | 4.111998000  |
| 1             | -0.624085000 | 7.071001000  | 1.662233000  | 6  | -1.439853000 | -1.523884000 | 4.868508000  |
| 1             | 2.417337000  | 7.090796000  | -1.386681000 | 1  | -0.621731000 | -1.236548000 | 5.546248000  |
| 1             | 1.257693000  | 8.213769000  | 0.505052000  | 1  | -2.010333000 | -2.312846000 | 5.393842000  |
| 6             | -0.287063000 | 3.297923000  | -1.061662000 | 6  | -2.351616000 | -0.340054000 | 4.584018000  |
| 1             | 0.263968000  | 2.986131000  | -1.969442000 | 1  | -1.752298000 | 0.472988000  | 4.129244000  |
| 1             | -1.361702000 | 3.246528000  | -1.309490000 | 1  | -2.771109000 | 0.068089000  | 5.516434000  |
| 1             | -1.349530000 | 4.812192000  | 0.927484000  | 7  | 0.665973000  | 1.839993000  | -1.546381000 |
| <b>TS1-L1</b> |              |              |              | 29 | -0.300769000 | 0.615870000  | -0.058144000 |
| 7             | -1.391418000 | -2.915401000 | 1.360603000  | 6  | -0.181566000 | 2.163465000  | -2.443641000 |
| 29            | 0.028209000  | -1.816215000 | 0.386045000  | 7  | -1.822134000 | 0.885920000  | -1.339979000 |
| 6             | -1.728792000 | -3.966821000 | 0.719598000  | 6  | -1.552052000 | 1.692747000  | -2.301553000 |
| 7             | -0.179161000 | -3.325202000 | -0.912431000 | 1  | 0.088722000  | 2.776157000  | -3.320648000 |

|              |              |              |              |    |              |              |              |
|--------------|--------------|--------------|--------------|----|--------------|--------------|--------------|
| 1            | -2.303266000 | 2.028331000  | -3.028965000 | 7  | 0.053774000  | -3.211307000 | -1.121500000 |
| 6            | -3.149743000 | 0.304519000  | -1.192583000 | 6  | -0.855431000 | -4.091860000 | -0.933605000 |
| 1            | -4.323380000 | 1.901825000  | -2.080098000 | 1  | -2.240644000 | -4.862796000 | 0.652184000  |
| 1            | -3.471339000 | 0.534197000  | -0.149513000 | 1  | -1.116497000 | -4.844102000 | -1.694707000 |
| 6            | -4.210856000 | 0.807219000  | -2.161120000 | 6  | 0.953339000  | -0.273717000 | 0.894065000  |
| 1            | -3.877611000 | 0.596350000  | -3.196217000 | 6  | 1.785644000  | 0.217863000  | 1.829426000  |
| 1            | -2.270712000 | -1.545380000 | -0.550806000 | 6  | 3.221204000  | -0.082295000 | 1.919330000  |
| 6            | -3.007551000 | -1.214439000 | -1.302981000 | 6  | 3.824302000  | -0.959808000 | 1.003150000  |
| 1            | -2.569418000 | -1.439657000 | -2.295395000 | 6  | 4.021699000  | 0.556069000  | 2.876005000  |
| 6            | -4.335413000 | -1.939728000 | -1.148025000 | 6  | 5.193673000  | -1.176224000 | 1.026480000  |
| 1            | -4.185616000 | -3.025408000 | -1.280505000 | 6  | 5.393611000  | 0.327204000  | 2.901007000  |
| 1            | -4.714947000 | -1.806133000 | -0.118608000 | 6  | 5.985854000  | -0.528508000 | 1.975826000  |
| 6            | -5.537602000 | 0.096720000  | -1.931454000 | 1  | 3.195028000  | -1.467794000 | 0.261327000  |
| 1            | -6.302161000 | 0.500055000  | -2.612792000 | 1  | 3.553277000  | 1.238203000  | 3.588750000  |
| 1            | -5.899206000 | 0.308609000  | -0.907202000 | 1  | 5.651401000  | -1.859498000 | 0.306055000  |
| 6            | -5.381810000 | -1.405554000 | -2.114703000 | 1  | 6.010149000  | 0.829164000  | 3.651494000  |
| 1            | -5.071043000 | -1.616053000 | -3.155092000 | 1  | 7.065420000  | -0.698769000 | 1.996859000  |
| 1            | -6.343138000 | -1.921886000 | -1.969676000 | 6  | 0.796519000  | -3.114196000 | -2.356435000 |
| 6            | 2.045679000  | 2.234684000  | -1.690393000 | 1  | -0.197248000 | -1.267609000 | -2.941026000 |
| 1            | 1.924436000  | 3.866038000  | -0.282716000 | 1  | 0.318516000  | -3.742027000 | -3.139107000 |
| 1            | 2.146848000  | 2.924111000  | -2.560072000 | 6  | 0.831109000  | -1.654781000 | -2.815287000 |
| 6            | 2.537352000  | 2.963012000  | -0.443015000 | 1  | 1.289750000  | -1.058903000 | -1.998146000 |
| 1            | 2.379478000  | 2.307259000  | 0.436698000  | 1  | 2.200495000  | -4.661656000 | -1.778255000 |
| 1            | 2.516990000  | 0.509720000  | -2.894133000 | 6  | 2.222682000  | -3.613831000 | -2.119734000 |
| 6            | 2.904053000  | 1.000970000  | -1.982815000 | 1  | 2.647477000  | -3.018829000 | -1.286333000 |
| 1            | 2.783674000  | 0.278239000  | -1.149904000 | 6  | 3.070635000  | -3.450040000 | -3.371190000 |
| 6            | 4.364491000  | 1.395629000  | -2.142688000 | 1  | 4.092397000  | -3.812047000 | -3.179267000 |
| 1            | 4.974244000  | 0.499317000  | -2.343598000 | 1  | 2.665746000  | -4.094648000 | -4.173540000 |
| 1            | 4.470477000  | 2.043351000  | -3.033857000 | 6  | 1.664521000  | -1.502697000 | -4.078618000 |
| 6            | 4.006711000  | 3.338471000  | -0.588170000 | 1  | 1.664076000  | -0.449264000 | -4.403702000 |
| 1            | 4.357693000  | 3.835014000  | 0.330423000  | 1  | 1.202532000  | -2.073154000 | -4.906229000 |
| 1            | 4.104973000  | 4.088769000  | -1.395993000 | 6  | 3.082728000  | -2.002953000 | -3.840692000 |
| 6            | 4.875810000  | 2.131480000  | -0.912311000 | 1  | 3.561505000  | -1.376465000 | -3.061365000 |
| 1            | 4.880812000  | 1.441520000  | -0.050381000 | 1  | 3.695990000  | -1.892240000 | -4.748142000 |
| 1            | 5.921526000  | 2.443716000  | -1.059408000 | 6  | -1.949084000 | -2.797675000 | 2.365343000  |
| 7            | 1.222122000  | 1.222745000  | 2.868970000  | 1  | -0.181820000 | -3.305315000 | 3.519455000  |
| 7            | -0.741886000 | 1.498585000  | 1.702584000  | 1  | -2.522632000 | -3.691986000 | 2.690444000  |
| 7            | 0.152262000  | 1.620263000  | 2.597341000  | 6  | -0.875283000 | -2.456761000 | 3.400976000  |
| 6            | -2.154159000 | 3.248103000  | 0.743314000  | 1  | -0.285347000 | -1.606862000 | 3.000285000  |
| 6            | -1.063167000 | 3.965287000  | 0.248302000  | 1  | -3.681026000 | -1.870435000 | 1.464937000  |
| 6            | -3.409359000 | 3.435178000  | 0.161403000  | 6  | -2.892265000 | -1.605110000 | 2.188034000  |
| 6            | -1.216502000 | 4.837172000  | -0.823340000 | 1  | -2.278587000 | -0.803029000 | 1.726159000  |
| 6            | -3.567464000 | 4.308614000  | -0.911011000 | 6  | -3.486247000 | -1.141910000 | 3.509261000  |
| 1            | -4.272541000 | 2.880630000  | 0.550034000  | 1  | -4.136170000 | -0.267202000 | 3.339671000  |
| 6            | -2.468403000 | 5.002643000  | -1.414926000 | 1  | -4.148945000 | -1.933011000 | 3.907851000  |
| 1            | -0.354281000 | 5.396480000  | -1.200296000 | 6  | -1.500219000 | -2.043276000 | 4.723817000  |
| 1            | -4.555781000 | 4.450897000  | -1.358056000 | 1  | -0.706278000 | -1.830776000 | 5.455657000  |
| 1            | -2.593201000 | 5.690662000  | -2.255514000 | 1  | -2.088547000 | -2.881333000 | 5.142715000  |
| 6            | -1.955059000 | 2.282534000  | 1.881093000  | 6  | -2.399150000 | -0.831983000 | 4.527704000  |
| 1            | -2.823939000 | 1.596741000  | 1.939275000  | 1  | -1.784307000 | 0.015490000  | 4.166278000  |
| 1            | -1.914611000 | 2.814482000  | 2.848316000  | 1  | -2.843177000 | -0.511709000 | 5.482600000  |
| 1            | -0.079207000 | 3.817889000  | 0.707007000  | 7  | 0.667992000  | 2.002096000  | -1.483083000 |
| <b>IC-L1</b> |              |              |              | 29 | -0.363643000 | 0.675238000  | -0.038303000 |
| 7            | -1.327089000 | -3.030711000 | 1.085792000  | 6  | -0.183160000 | 2.407034000  | -2.338758000 |
| 29           | 0.123044000  | -1.811109000 | 0.317534000  | 7  | -1.824731000 | 1.029776000  | -1.348390000 |
| 6            | -1.555486000 | -4.052882000 | 0.355557000  | 6  | -1.549191000 | 1.892714000  | -2.255523000 |

|               |              |              |              |    |              |              |              |
|---------------|--------------|--------------|--------------|----|--------------|--------------|--------------|
| 1             | 0.071398000  | 3.119609000  | -3.142520000 | 6  | -1.557356000 | -4.084239000 | 0.077855000  |
| 1             | -2.290595000 | 2.244032000  | -2.986107000 | 7  | 0.059677000  | -3.089059000 | -1.296021000 |
| 6             | -3.123051000 | 0.374575000  | -1.278656000 | 6  | -0.824671000 | -4.007584000 | -1.191171000 |
| 1             | -4.351743000 | 1.991010000  | -2.041630000 | 1  | -2.237732000 | -4.924861000 | 0.287764000  |
| 1             | -3.468857000 | 0.488266000  | -0.225581000 | 1  | -1.043379000 | -4.711659000 | -2.009747000 |
| 6             | -4.194645000 | 0.912299000  | -2.214531000 | 6  | 0.836293000  | -0.284057000 | 1.005635000  |
| 1             | -3.846595000 | 0.803056000  | -3.260372000 | 6  | 1.741042000  | 0.159325000  | 1.908655000  |
| 1             | -2.147746000 | -1.484750000 | -0.802361000 | 6  | 3.157312000  | -0.237952000 | 1.921924000  |
| 6             | -2.904358000 | -1.120881000 | -1.522378000 | 6  | 3.685937000  | -1.057673000 | 0.911983000  |
| 1             | -2.467399000 | -1.237749000 | -2.534019000 | 6  | 4.018121000  | 0.261079000  | 2.909062000  |
| 6             | -4.199540000 | -1.912866000 | -1.427836000 | 6  | 5.041791000  | -1.347396000 | 0.870796000  |
| 1             | -4.005004000 | -2.977099000 | -1.646509000 | 6  | 5.374522000  | -0.043885000 | 2.870980000  |
| 1             | -4.580986000 | -1.876927000 | -0.391364000 | 6  | 5.894006000  | -0.836649000 | 1.850837000  |
| 6             | -5.490287000 | 0.128169000  | -2.055727000 | 1  | 3.011374000  | -1.454349000 | 0.142236000  |
| 1             | -6.267312000 | 0.548989000  | -2.711755000 | 1  | 3.608581000  | 0.900288000  | 3.694112000  |
| 1             | -5.868216000 | 0.243592000  | -1.022157000 | 1  | 5.441202000  | -1.980757000 | 0.073756000  |
| 6             | -5.266479000 | -1.347136000 | -2.353890000 | 1  | 6.037246000  | 0.349573000  | 3.646435000  |
| 1             | -4.945004000 | -1.462199000 | -3.405925000 | 1  | 6.962594000  | -1.064923000 | 1.821408000  |
| 1             | -6.204631000 | -1.914447000 | -2.255251000 | 6  | 0.826012000  | -2.907574000 | -2.508181000 |
| 6             | 2.035474000  | 2.455587000  | -1.534027000 | 1  | -0.103198000 | -0.988310000 | -2.942798000 |
| 1             | 1.737493000  | 4.080728000  | -0.142194000 | 1  | 0.341433000  | -3.451651000 | -3.347613000 |
| 1             | 2.173298000  | 3.153383000  | -2.391175000 | 6  | 0.911053000  | -1.418772000 | -2.842295000 |
| 6             | 2.388730000  | 3.196516000  | -0.244652000 | 1  | 1.378361000  | -0.909615000 | -1.972862000 |
| 1             | 2.167544000  | 2.531967000  | 0.615786000  | 1  | 2.164905000  | -4.551861000 | -2.062923000 |
| 1             | 2.692599000  | 0.751629000  | -2.679358000 | 6  | 2.230906000  | -3.477182000 | -2.299982000 |
| 6             | 2.955459000  | 1.251232000  | -1.731084000 | 1  | 2.663363000  | -2.985190000 | -1.406727000 |
| 1             | 2.741655000  | 0.534075000  | -0.915210000 | 6  | 3.107305000  | -3.226036000 | -3.516978000 |
| 6             | 4.421898000  | 1.652764000  | -1.707642000 | 1  | 4.115128000  | -3.632163000 | -3.340103000 |
| 1             | 5.051999000  | 0.753742000  | -1.816263000 | 1  | 2.701903000  | -3.784927000 | -4.380959000 |
| 1             | 4.641744000  | 2.289222000  | -2.585980000 | 6  | 1.764567000  | -1.192229000 | -4.080488000 |
| 6             | 3.855162000  | 3.604810000  | -0.243159000 | 1  | 1.792061000  | -0.119367000 | -4.331126000 |
| 1             | 4.090759000  | 4.136638000  | 0.691474000  | 1  | 1.302587000  | -1.691913000 | -4.952815000 |
| 1             | 4.027462000  | 4.331627000  | -1.059808000 | 6  | 3.165874000  | -1.744176000 | -3.857396000 |
| 6             | 4.770865000  | 2.404778000  | -0.431580000 | 1  | 3.638889000  | -1.198411000 | -3.015259000 |
| 1             | 4.668449000  | 1.724879000  | 0.434126000  | 1  | 3.803534000  | -1.571232000 | -4.737888000 |
| 1             | 5.824712000  | 2.723184000  | -0.448837000 | 6  | -2.020015000 | -2.994933000 | 2.168244000  |
| 7             | 1.328006000  | 1.152284000  | 2.783732000  | 1  | -0.331332000 | -3.687873000 | 3.340049000  |
| 7             | -0.724868000 | 1.219976000  | 1.872600000  | 1  | -2.634564000 | -3.893723000 | 2.388248000  |
| 7             | 0.160516000  | 1.602717000  | 2.736799000  | 6  | -0.969148000 | -2.792400000 | 3.262250000  |
| 6             | -2.165124000 | 3.024666000  | 0.986495000  | 1  | -0.315883000 | -1.955542000 | 2.941849000  |
| 6             | -1.072883000 | 3.813190000  | 0.616868000  | 1  | -3.684081000 | -1.923988000 | 1.298283000  |
| 6             | -3.407478000 | 3.266660000  | 0.393538000  | 6  | -2.909779000 | -1.753713000 | 2.064723000  |
| 6             | -1.211102000 | 4.802429000  | -0.350879000 | 1  | -2.244473000 | -0.949597000 | 1.685553000  |
| 6             | -3.548293000 | 4.254306000  | -0.576002000 | 6  | -3.522529000 | -1.361509000 | 3.399070000  |
| 1             | -4.273888000 | 2.663377000  | 0.692017000  | 1  | -4.129715000 | -0.448885000 | 3.277071000  |
| 6             | -2.445195000 | 5.015472000  | -0.963338000 | 1  | -4.228784000 | -2.148275000 | 3.724389000  |
| 1             | -0.349521000 | 5.418475000  | -0.628816000 | 6  | -1.614780000 | -2.437895000 | 4.592389000  |
| 1             | -4.525891000 | 4.437493000  | -1.031951000 | 1  | -0.834289000 | -2.317702000 | 5.358957000  |
| 1             | -2.556236000 | 5.794775000  | -1.722298000 | 1  | -2.256289000 | -3.271221000 | 4.935772000  |
| 6             | -1.989883000 | 1.932338000  | 2.009364000  | 6  | -2.448406000 | -1.172121000 | 4.458867000  |
| 1             | -2.824099000 | 1.211847000  | 1.920042000  | 1  | -1.785139000 | -0.334838000 | 4.164233000  |
| 1             | -2.039232000 | 2.349111000  | 3.031865000  | 1  | -2.898179000 | -0.892666000 | 5.423787000  |
| 1             | -0.104141000 | 3.637821000  | 1.097778000  | 7  | 0.692176000  | 2.130062000  | -1.381467000 |
| <b>TS2-L1</b> |              |              |              | 29 | -0.327660000 | 0.730416000  | -0.057688000 |
| 7             | -1.362048000 | -3.123160000 | 0.893260000  | 6  | -0.151573000 | 2.602810000  | -2.209742000 |
| 29            | 0.066351000  | -1.787505000 | 0.248853000  | 7  | -1.793643000 | 1.149192000  | -1.341620000 |

|             |              |              |              |    |              |              |              |
|-------------|--------------|--------------|--------------|----|--------------|--------------|--------------|
| 6           | -1.516576000 | 2.075125000  | -2.183024000 | 29 | 0.510516000  | -0.405737000 | 0.847465000  |
| 1           | 0.109145000  | 3.379554000  | -2.948930000 | 6  | 0.994128000  | -2.163201000 | 2.984605000  |
| 1           | -2.251119000 | 2.470420000  | -2.898069000 | 7  | -0.015520000 | -0.049902000 | 2.717574000  |
| 6           | -3.084223000 | 0.476354000  | -1.327714000 | 6  | 0.210022000  | -1.042186000 | 3.495402000  |
| 1           | -4.319822000 | 2.129624000  | -1.989661000 | 1  | 1.183975000  | -3.032125000 | 3.635568000  |
| 1           | -3.439552000 | 0.516485000  | -0.272948000 | 1  | -0.150466000 | -1.053771000 | 4.536175000  |
| 6           | -4.152749000 | 1.066330000  | -2.234603000 | 6  | 0.079258000  | -0.775332000 | -1.017252000 |
| 1           | -3.795297000 | 1.031278000  | -3.282389000 | 6  | -0.467629000 | -2.025672000 | -1.387058000 |
| 1           | -2.102527000 | -1.402547000 | -0.953281000 | 6  | -1.417185000 | -2.884925000 | -0.684096000 |
| 6           | -2.850462000 | -0.999012000 | -1.661793000 | 6  | -1.860257000 | -4.068292000 | -1.298880000 |
| 1           | -2.398615000 | -1.052767000 | -2.672175000 | 6  | -1.847609000 | -2.616585000 | 0.625621000  |
| 6           | -4.141048000 | -1.803476000 | -1.630402000 | 6  | -2.696024000 | -4.948640000 | -0.622654000 |
| 1           | -3.936829000 | -2.850418000 | -1.913799000 | 6  | -2.692114000 | -3.495738000 | 1.295888000  |
| 1           | -4.531120000 | -1.835563000 | -0.596843000 | 6  | -3.115157000 | -4.670469000 | 0.677609000  |
| 6           | -5.443099000 | 0.263566000  | -2.139141000 | 1  | -1.519536000 | -4.287097000 | -2.314388000 |
| 1           | -6.217768000 | 0.719477000  | -2.774145000 | 1  | -1.526719000 | -1.693860000 | 1.127125000  |
| 1           | -5.831151000 | 0.309570000  | -1.103890000 | 1  | -3.024528000 | -5.867329000 | -1.116241000 |
| 6           | -5.203950000 | -1.187746000 | -2.528757000 | 1  | -3.016690000 | -3.266983000 | 2.315484000  |
| 1           | -4.871674000 | -1.232763000 | -3.582764000 | 1  | -3.768866000 | -5.367725000 | 1.207873000  |
| 1           | -6.138212000 | -1.767450000 | -2.475996000 | 6  | -0.764663000 | 1.092809000  | 3.192497000  |
| 6           | 2.060705000  | 2.585708000  | -1.372913000 | 1  | 0.985672000  | 2.368110000  | 3.251310000  |
| 1           | 1.735409000  | 4.133078000  | 0.101423000  | 1  | -0.862765000 | 1.032011000  | 4.297634000  |
| 1           | 2.220180000  | 3.328578000  | -2.186453000 | 6  | -0.033752000 | 2.381110000  | 2.831584000  |
| 6           | 2.381090000  | 3.249021000  | -0.033654000 | 1  | 0.070020000  | 2.402724000  | 1.721232000  |
| 1           | 2.128184000  | 2.536999000  | 0.778606000  | 1  | -2.682375000 | 0.142785000  | 2.829810000  |
| 1           | 2.741400000  | 0.934914000  | -2.581127000 | 6  | -2.164541000 | 1.086890000  | 2.580841000  |
| 6           | 2.977575000  | 1.386368000  | -1.603192000 | 1  | -2.046310000 | 1.093982000  | 1.475882000  |
| 1           | 2.728004000  | 0.636472000  | -0.827678000 | 6  | -2.962763000 | 2.306233000  | 3.013187000  |
| 6           | 4.446798000  | 1.764867000  | -1.511258000 | 1  | -3.955786000 | 2.291111000  | 2.535180000  |
| 1           | 5.067927000  | 0.863456000  | -1.649073000 | 1  | -3.150590000 | 2.261829000  | 4.102234000  |
| 1           | 4.704113000  | 2.445752000  | -2.344873000 | 6  | -0.831893000 | 3.584288000  | 3.312103000  |
| 6           | 3.851219000  | 3.637401000  | 0.040104000  | 1  | -0.288831000 | 4.519255000  | 3.103992000  |
| 1           | 4.058582000  | 4.112704000  | 1.011113000  | 1  | -0.930104000 | 3.540576000  | 4.413003000  |
| 1           | 4.061042000  | 4.406393000  | -0.727605000 | 6  | -2.215852000 | 3.589834000  | 2.679604000  |
| 6           | 4.759564000  | 2.437539000  | -0.183394000 | 1  | -2.104785000 | 3.666047000  | 1.577704000  |
| 1           | 4.616419000  | 1.709175000  | 0.636253000  | 1  | -2.792797000 | 4.471733000  | 2.998128000  |
| 1           | 5.816998000  | 2.741504000  | -0.143859000 | 6  | 2.376967000  | -3.102261000 | 1.331880000  |
| 7           | 1.389884000  | 1.115890000  | 2.865093000  | 1  | 1.028031000  | -3.890742000 | -0.170568000 |
| 7           | -0.649482000 | 1.085527000  | 1.987995000  | 1  | 2.312318000  | -3.988973000 | 1.999932000  |
| 7           | 0.213682000  | 1.558694000  | 2.834496000  | 6  | 2.060761000  | -3.514251000 | -0.097913000 |
| 6           | -2.140197000 | 2.903415000  | 1.168536000  | 1  | 2.132390000  | -2.602978000 | -0.725683000 |
| 6           | -1.065102000 | 3.737281000  | 0.853230000  | 1  | 4.031437000  | -2.201408000 | 2.412956000  |
| 6           | -3.393385000 | 3.173823000  | 0.609148000  | 6  | 3.793823000  | -2.527751000 | 1.385925000  |
| 6           | -1.230326000 | 4.798292000  | -0.031613000 | 1  | 3.785026000  | -1.624027000 | 0.752996000  |
| 6           | -3.560677000 | 4.232915000  | -0.276268000 | 6  | 4.821424000  | -3.519056000 | 0.862746000  |
| 1           | -4.248095000 | 2.536932000  | 0.868823000  | 1  | 5.820575000  | -3.051939000 | 0.889238000  |
| 6           | -2.473451000 | 5.040084000  | -0.613162000 | 1  | 4.874550000  | -4.390850000 | 1.541646000  |
| 1           | -0.381351000 | 5.448793000  | -0.266564000 | 6  | 3.062434000  | -4.543245000 | -0.596820000 |
| 1           | -4.546537000 | 4.436830000  | -0.704703000 | 1  | 2.795360000  | -4.846390000 | -1.620648000 |
| 1           | -2.604796000 | 5.875929000  | -1.305787000 | 1  | 2.994966000  | -5.457583000 | 0.022633000  |
| 6           | -1.953562000 | 1.734099000  | 2.102036000  | 6  | 4.476756000  | -3.987349000 | -0.543274000 |
| 1           | -2.746431000 | 0.990878000  | 1.909706000  | 1  | 4.546958000  | -3.128939000 | -1.238390000 |
| 1           | -2.074971000 | 2.059911000  | 3.151687000  | 1  | 5.207792000  | -4.732078000 | -0.894493000 |
| 1           | -0.089190000 | 3.544837000  | 1.310740000  | 7  | -2.910060000 | 1.454971000  | -1.033346000 |
| <b>P-L1</b> |              |              |              | 29 | -0.952990000 | 0.880937000  | -0.643054000 |
| 7           | 1.475487000  | -2.073195000 | 1.805317000  | 6  | -3.009834000 | 2.700853000  | -1.305609000 |

|              |              |              |              |    |              |              |              |
|--------------|--------------|--------------|--------------|----|--------------|--------------|--------------|
| 7            | -0.701605000 | 2.927890000  | -0.957091000 | 7  | -3.372560000 | -0.102776000 | -1.198421000 |
| 6            | -1.808091000 | 3.518880000  | -1.216757000 | 29 | -1.376571000 | -0.437028000 | -0.999241000 |
| 1            | -3.961944000 | 3.156573000  | -1.620362000 | 6  | -3.640153000 | 1.131680000  | -1.495182000 |
| 1            | -1.881183000 | 4.604233000  | -1.389571000 | 7  | -1.338798000 | 1.558067000  | -1.523142000 |
| 6            | 0.524915000  | 3.705041000  | -0.897383000 | 6  | -2.535915000 | 2.035726000  | -1.652522000 |
| 1            | 0.980501000  | 3.229073000  | -2.977713000 | 1  | -4.666964000 | 1.500148000  | -1.628195000 |
| 1            | 1.294337000  | 3.039785000  | -0.461260000 | 1  | -2.730667000 | 3.091948000  | -1.890913000 |
| 6            | 0.996301000  | 4.099239000  | -2.301101000 | 6  | -0.088116000 | -1.693580000 | -0.566109000 |
| 1            | 0.267995000  | 4.824512000  | -2.715524000 | 6  | 0.977430000  | -2.236174000 | -0.175515000 |
| 1            | 0.051229000  | 4.682530000  | 0.976262000  | 6  | 2.132729000  | -3.030227000 | 0.098982000  |
| 6            | 0.453493000  | 4.948907000  | -0.015267000 | 6  | 2.657340000  | -3.894374000 | -0.878486000 |
| 1            | -0.246239000 | 5.683619000  | -0.456671000 | 6  | 2.820027000  | -2.891086000 | 1.319144000  |
| 6            | 1.838042000  | 5.574295000  | 0.088095000  | 6  | 3.842162000  | -4.579856000 | -0.642366000 |
| 1            | 1.809529000  | 6.461110000  | 0.740040000  | 6  | 4.005895000  | -3.574968000 | 1.543979000  |
| 1            | 2.521960000  | 4.854632000  | 0.577902000  | 6  | 4.525159000  | -4.417986000 | 0.561912000  |
| 6            | 2.380829000  | 4.723402000  | -2.216143000 | 1  | 2.127454000  | -4.009033000 | -1.827748000 |
| 1            | 2.737535000  | 4.998323000  | -3.220773000 | 1  | 2.412086000  | -2.213774000 | 2.078543000  |
| 1            | 3.090639000  | 3.961539000  | -1.836225000 | 1  | 4.240840000  | -5.248493000 | -1.410194000 |
| 6            | 2.380109000  | 5.931544000  | -1.289568000 | 1  | 4.530018000  | -3.451903000 | 2.496102000  |
| 1            | 1.749110000  | 6.725133000  | -1.731759000 | 1  | 5.459412000  | -4.957525000 | 0.737831000  |
| 1            | 3.391750000  | 6.357732000  | -1.208012000 | 7  | 2.596528000  | 0.686591000  | 0.891714000  |
| 6            | -4.063946000 | 0.596695000  | -1.185000000 | 29 | 0.824217000  | -0.228849000 | 0.459448000  |
| 1            | -3.573587000 | 0.114471000  | -3.238268000 | 6  | 2.424441000  | 1.747457000  | 1.618232000  |
| 1            | -4.947692000 | 1.208721000  | -1.469437000 | 7  | 0.117958000  | 1.355249000  | 1.525051000  |
| 6            | -3.790314000 | -0.417075000 | -2.296940000 | 6  | 1.072721000  | 2.167971000  | 1.862926000  |
| 1            | -2.873466000 | -0.976592000 | -2.027050000 | 1  | 3.266035000  | 2.334356000  | 2.013444000  |
| 1            | -4.552342000 | 0.626900000  | 0.921775000  | 1  | 0.879430000  | 3.131248000  | 2.356916000  |
| 6            | -4.350291000 | -0.117414000 | 0.131093000  | 6  | -1.232195000 | 1.658258000  | 1.633019000  |
| 1            | -3.424019000 | -0.650277000 | 0.417293000  | 6  | -1.744467000 | 2.961967000  | 1.610379000  |
| 6            | -5.497499000 | -1.105214000 | -0.011413000 | 6  | -2.133866000 | 0.579495000  | 1.727782000  |
| 1            | -5.653635000 | -1.631888000 | 0.944232000  | 6  | -3.115234000 | 3.186786000  | 1.629810000  |
| 1            | -6.435280000 | -0.552903000 | -0.211410000 | 6  | -3.493646000 | 0.797475000  | 1.808144000  |
| 6            | -4.962014000 | -1.374105000 | -2.447021000 | 6  | -4.001398000 | 2.100162000  | 1.719651000  |
| 1            | -4.752032000 | -2.092241000 | -3.254781000 | 1  | -1.062572000 | 3.813773000  | 1.527997000  |
| 1            | -5.861112000 | -0.811510000 | -2.762526000 | 1  | -1.724729000 | -0.437540000 | 1.771488000  |
| 6            | -5.235510000 | -2.095757000 | -1.136866000 | 1  | -3.490522000 | 4.211078000  | 1.576915000  |
| 1            | -4.353827000 | -2.711018000 | -0.880093000 | 1  | -4.199762000 | -0.031547000 | 1.907706000  |
| 1            | -6.081471000 | -2.792361000 | -1.242658000 | 6  | 3.832374000  | 0.128441000  | 0.610259000  |
| 7            | 0.130165000  | -2.460805000 | -2.520186000 | 6  | 3.961024000  | -0.591526000 | -0.593720000 |
| 7            | 1.012701000  | -0.605263000 | -2.016326000 | 6  | 4.923758000  | 0.181647000  | 1.486489000  |
| 7            | 1.022833000  | -1.601164000 | -2.892892000 | 6  | 5.141087000  | -1.218565000 | -0.917970000 |
| 6            | 3.173732000  | 0.358669000  | -1.250445000 | 6  | 6.108251000  | -0.472653000 | 1.182523000  |
| 6            | 3.201779000  | 0.970192000  | 0.009709000  | 6  | 6.225081000  | -1.178784000 | -0.024914000 |
| 6            | 4.317621000  | -0.304033000 | -1.702658000 | 1  | 3.091057000  | -0.648169000 | -1.260349000 |
| 6            | 4.362644000  | 0.960161000  | 0.780357000  | 1  | 4.825655000  | 0.693598000  | 2.448527000  |
| 6            | 5.478304000  | -0.318467000 | -0.932147000 | 1  | 5.257045000  | -1.783620000 | -1.845847000 |
| 1            | 4.300747000  | -0.789222000 | -2.685164000 | 1  | 6.931696000  | -0.448838000 | 1.898681000  |
| 6            | 5.507679000  | 0.327298000  | 0.302206000  | 6  | -4.341202000 | -1.043711000 | -0.900413000 |
| 1            | 4.377505000  | 1.460107000  | 1.752486000  | 6  | -5.644855000 | -0.703743000 | -0.479455000 |
| 1            | 6.373461000  | -0.822459000 | -1.308062000 | 6  | -3.986692000 | -2.398855000 | -0.971199000 |
| 1            | 6.426379000  | 0.335818000  | 0.894873000  | 6  | -6.558049000 | -1.690030000 | -0.184376000 |
| 6            | 1.963899000  | 0.473919000  | -2.145366000 | 6  | -4.908019000 | -3.396561000 | -0.697590000 |
| 1            | 2.270888000  | 0.494395000  | -3.201275000 | 6  | -6.208697000 | -3.047959000 | -0.307944000 |
| 1            | 1.425699000  | 1.407984000  | -1.923135000 | 1  | -5.916362000 | 0.344797000  | -0.319607000 |
| 1            | 2.306510000  | 1.489939000  | 0.380321000  | 1  | -2.962123000 | -2.652226000 | -1.266198000 |
| <b>Ac-L2</b> |              |              |              | 1  | -7.563460000 | -1.451593000 | 0.170008000  |

|              |              |              |              |   |              |              |              |
|--------------|--------------|--------------|--------------|---|--------------|--------------|--------------|
| 1            | -4.606868000 | -4.442254000 | -0.780642000 | 6 | -0.901478000 | 2.465864000  | 2.341724000  |
| 6            | -0.190104000 | 2.333166000  | -1.533628000 | 1 | 0.831261000  | 3.692167000  | 2.943381000  |
| 6            | -0.174461000 | 3.694132000  | -1.197136000 | 1 | -1.646975000 | 3.056191000  | 2.892401000  |
| 6            | 1.034545000  | 1.700605000  | -1.828783000 | 7 | 3.781325000  | -0.547169000 | 1.356813000  |
| 6            | 1.019464000  | 4.399262000  | -1.128546000 | 7 | 1.472554000  | -0.896572000 | 1.664182000  |
| 6            | 2.221168000  | 2.403088000  | -1.798850000 | 7 | 2.694723000  | -0.787443000 | 1.536108000  |
| 6            | 2.230554000  | 3.756088000  | -1.431481000 | 6 | 1.711741000  | -3.372166000 | 1.288984000  |
| 1            | -1.109383000 | 4.203538000  | -0.945544000 | 6 | 2.252248000  | -3.272211000 | 0.001728000  |
| 1            | 1.014531000  | 0.641661000  | -2.116580000 | 6 | 1.862831000  | -4.563562000 | 2.000772000  |
| 1            | 1.002969000  | 5.452761000  | -0.841588000 | 6 | 2.924792000  | -4.350626000 | -0.564175000 |
| 1            | 3.176146000  | 1.926672000  | -2.039046000 | 6 | 2.532097000  | -5.644681000 | 1.431615000  |
| 8            | -5.331291000 | 2.216812000  | 1.710359000  | 1 | 1.454169000  | -4.644412000 | 3.013537000  |
| 6            | -5.907009000 | 3.492209000  | 1.730590000  | 6 | 3.061520000  | -5.542287000 | 0.147555000  |
| 1            | -5.661434000 | 4.064880000  | 0.819554000  | 1 | 3.341216000  | -4.261226000 | -1.571637000 |
| 1            | -6.991949000 | 3.350016000  | 1.777919000  | 1 | 2.652972000  | -6.569883000 | 2.002325000  |
| 1            | -5.582182000 | 4.067226000  | 2.613820000  | 1 | 3.596442000  | -6.387115000 | -0.294612000 |
| 8            | 7.310398000  | -1.851251000 | -0.393368000 | 6 | 0.918459000  | -2.240918000 | 1.877036000  |
| 6            | 8.434782000  | -1.854837000 | 0.438867000  | 1 | 0.749513000  | -2.402085000 | 2.956108000  |
| 1            | 8.822954000  | -0.834765000 | 0.598629000  | 1 | -0.080361000 | -2.200829000 | 1.399454000  |
| 1            | 8.212169000  | -2.312629000 | 1.417639000  | 1 | 2.119595000  | -2.342831000 | -0.567541000 |
| 1            | 9.200626000  | -2.452055000 | -0.067266000 | 6 | -2.538048000 | 0.929652000  | 1.634330000  |
| 8            | 3.422333000  | 4.349177000  | -1.390873000 | 6 | -3.615324000 | 1.820522000  | 1.562157000  |
| 6            | 3.500020000  | 5.715661000  | -1.105327000 | 6 | -2.794672000 | -0.447055000 | 1.517637000  |
| 1            | 3.129602000  | 5.941307000  | -0.090356000 | 6 | -4.911865000 | 1.356996000  | 1.380895000  |
| 1            | 4.558025000  | 5.992339000  | -1.165634000 | 6 | -4.081124000 | -0.920978000 | 1.379106000  |
| 1            | 2.930793000  | 6.315102000  | -1.835819000 | 6 | -5.155837000 | -0.023132000 | 1.300157000  |
| 8            | -7.162457000 | -3.922173000 | -0.010701000 | 1 | -3.426490000 | 2.900761000  | 1.561152000  |
| 6            | -6.888680000 | -5.292954000 | -0.088472000 | 1 | -1.946253000 | -1.141055000 | 1.548682000  |
| 1            | -6.604037000 | -5.589383000 | -1.111936000 | 1 | -5.728543000 | 2.077007000  | 1.293094000  |
| 1            | -6.084708000 | -5.583488000 | 0.608478000  | 1 | -4.289605000 | -1.992646000 | 1.305595000  |
| 1            | -7.809859000 | -5.814706000 | 0.191292000  | 6 | 2.595223000  | 2.479384000  | 1.335931000  |
| <b>RC-L2</b> |              |              |              | 6 | 3.198006000  | 2.373910000  | 0.068239000  |
| 7            | -2.500577000 | -1.619442000 | -1.409062000 | 6 | 3.409010000  | 2.654667000  | 2.463765000  |
| 29           | -1.059537000 | -0.242129000 | -1.139090000 | 6 | 4.566302000  | 2.436415000  | -0.071336000 |
| 6            | -3.613318000 | -1.087815000 | -1.816201000 | 6 | 4.789414000  | 2.700972000  | 2.334458000  |
| 7            | -2.660970000 | 1.036096000  | -1.524033000 | 6 | 5.378563000  | 2.588032000  | 1.064680000  |
| 6            | -3.696920000 | 0.342774000  | -1.884210000 | 1 | 2.546709000  | 2.267175000  | -0.803046000 |
| 1            | -4.499136000 | -1.686184000 | -2.069721000 | 1 | 2.956477000  | 2.694811000  | 3.459741000  |
| 1            | -4.641948000 | 0.797212000  | -2.213440000 | 1 | 5.045153000  | 2.353802000  | -1.053102000 |
| 6            | 0.817651000  | -0.028497000 | -1.145701000 | 1 | 5.406711000  | 2.799784000  | 3.229278000  |
| 6            | 1.924246000  | -0.030613000 | -1.713792000 | 6 | -2.352337000 | -2.961414000 | -1.097114000 |
| 6            | 3.189684000  | 0.118382000  | -2.337309000 | 6 | -3.436084000 | -3.839067000 | -0.881104000 |
| 6            | 3.378413000  | 1.127357000  | -3.304997000 | 6 | -1.049761000 | -3.458786000 | -0.936252000 |
| 6            | 4.298029000  | -0.665550000 | -1.960123000 | 6 | -3.212395000 | -5.153240000 | -0.535051000 |
| 6            | 4.629480000  | 1.343947000  | -3.865482000 | 6 | -0.814838000 | -4.782115000 | -0.593425000 |
| 6            | 5.547075000  | -0.434935000 | -2.519707000 | 6 | -1.901706000 | -5.643632000 | -0.395200000 |
| 6            | 5.719727000  | 0.568691000  | -3.471667000 | 1 | -4.465922000 | -3.478050000 | -0.953219000 |
| 1            | 2.520992000  | 1.736613000  | -3.605192000 | 1 | -0.209359000 | -2.774206000 | -1.114724000 |
| 1            | 4.171273000  | -1.446477000 | -1.204574000 | 1 | -4.039073000 | -5.842606000 | -0.348146000 |
| 1            | 4.758376000  | 2.128302000  | -4.616223000 | 1 | 0.215096000  | -5.136507000 | -0.492280000 |
| 1            | 6.399091000  | -1.044878000 | -2.208358000 | 6 | -2.649839000 | 2.415993000  | -1.389668000 |
| 1            | 6.705293000  | 0.745065000  | -3.910147000 | 6 | -3.796409000 | 3.224732000  | -1.459882000 |
| 7            | 1.222557000  | 2.305975000  | 1.408036000  | 6 | -1.425345000 | 3.030429000  | -1.061683000 |
| 29           | 0.306037000  | 0.585109000  | 0.687576000  | 6 | -3.733920000 | 4.583579000  | -1.195145000 |
| 6            | 0.463166000  | 2.893594000  | 2.282036000  | 6 | -1.354436000 | 4.380427000  | -0.787590000 |
| 7            | -1.214294000 | 1.349944000  | 1.745887000  | 6 | -2.508078000 | 5.175541000  | -0.848328000 |

|               |              |              |              |   |              |              |              |
|---------------|--------------|--------------|--------------|---|--------------|--------------|--------------|
| 1             | -4.771181000 | 2.788394000  | -1.692595000 | 6 | 3.047068000  | 1.686520000  | -2.773807000 |
| 1             | -0.520050000 | 2.411947000  | -1.034150000 | 6 | 3.577502000  | 2.983935000  | -2.710548000 |
| 1             | -4.645923000 | 5.181150000  | -1.252613000 | 1 | 0.780817000  | 4.658649000  | -1.725352000 |
| 1             | -0.405567000 | 4.862030000  | -0.537638000 | 1 | 1.307313000  | 0.448638000  | -2.478040000 |
| 8             | -6.362870000 | -0.562958000 | 1.126518000  | 1 | 3.144062000  | 5.069255000  | -2.265078000 |
| 6             | -7.485761000 | 0.269380000  | 1.097818000  | 1 | 3.710027000  | 0.869213000  | -3.069802000 |
| 1             | -7.455866000 | 0.964082000  | 0.240360000  | 6 | -3.970799000 | 0.791218000  | -0.552153000 |
| 1             | -8.361005000 | -0.381177000 | 0.995553000  | 6 | -3.976947000 | -0.014989000 | 0.601732000  |
| 1             | -7.580196000 | 0.854522000  | 2.028174000  | 6 | -5.121772000 | 0.847501000  | -1.351097000 |
| 8             | 6.690830000  | 2.609936000  | 0.849699000  | 6 | -5.098005000 | -0.734058000 | 0.947691000  |
| 6             | 7.563174000  | 2.767086000  | 1.930673000  | 6 | -6.237085000 | 0.088123000  | -1.035402000 |
| 1             | 7.390074000  | 3.721721000  | 2.456035000  | 6 | -6.227875000 | -0.717802000 | 0.114715000  |
| 1             | 7.468374000  | 1.937343000  | 2.651719000  | 1 | -3.066043000 | -0.062209000 | 1.208140000  |
| 1             | 8.578578000  | 2.766636000  | 1.520150000  | 1 | -5.114499000 | 1.441710000  | -2.270149000 |
| 8             | -2.353786000 | 6.467517000  | -0.569495000 | 1 | -5.124336000 | -1.368439000 | 1.836753000  |
| 6             | -3.453866000 | 7.326745000  | -0.657456000 | 1 | -7.102979000 | 0.106368000  | -1.699798000 |
| 1             | -4.245298000 | 7.048295000  | 0.059342000  | 6 | 3.310438000  | -1.796388000 | -0.446648000 |
| 1             | -3.091303000 | 8.330826000  | -0.412777000 | 6 | 4.692327000  | -1.961755000 | -0.679182000 |
| 1             | -3.878634000 | 7.337537000  | -1.675417000 | 6 | 2.467272000  | -2.904994000 | -0.624531000 |
| 8             | -1.790734000 | -6.925686000 | -0.062642000 | 6 | 5.194464000  | -3.180940000 | -1.073804000 |
| 6             | -0.516681000 | -7.473110000 | 0.124267000  | 6 | 2.965885000  | -4.139052000 | -1.011939000 |
| 1             | 0.090373000  | -7.411815000 | -0.795495000 | 6 | 4.339792000  | -4.286480000 | -1.241999000 |
| 1             | 0.023836000  | -6.961950000 | 0.939766000  | 1 | 5.384276000  | -1.126557000 | -0.542204000 |
| 1             | -0.660962000 | -8.526093000 | 0.388761000  | 1 | 1.390164000  | -2.780544000 | -0.452746000 |
| <b>TS1-L2</b> |              |              |              | 1 | 6.260581000  | -3.327222000 | -1.262766000 |
| 7             | 2.723256000  | -0.618410000 | -0.022677000 | 1 | 2.279229000  | -4.978156000 | -1.136765000 |
| 29            | 0.711272000  | -0.489072000 | 0.549220000  | 6 | 0.435288000  | 2.404071000  | 1.315252000  |
| 6             | 3.361520000  | 0.480033000  | 0.235099000  | 6 | 0.661478000  | 3.773458000  | 1.123361000  |
| 7             | 1.345990000  | 1.400049000  | 1.001841000  | 6 | -0.835153000 | 1.998035000  | 1.771818000  |
| 6             | 2.588702000  | 1.601727000  | 0.689054000  | 6 | -0.350807000 | 4.700607000  | 1.333963000  |
| 1             | 4.446339000  | 0.601735000  | 0.106192000  | 6 | -1.843916000 | 2.910917000  | 1.996894000  |
| 1             | 3.067975000  | 2.591107000  | 0.748349000  | 6 | -1.618484000 | 4.274958000  | 1.764399000  |
| 6             | -0.885952000 | -1.227704000 | -0.177149000 | 1 | 1.632898000  | 4.130216000  | 0.771145000  |
| 6             | -1.641591000 | -2.241100000 | -0.069728000 | 1 | -1.002122000 | 0.925690000  | 1.941845000  |
| 6             | -2.871532000 | -2.896548000 | -0.413386000 | 1 | -0.146322000 | 5.760510000  | 1.167193000  |
| 6             | -3.545127000 | -3.805667000 | 0.416615000  | 1 | -2.832710000 | 2.599244000  | 2.344794000  |
| 6             | -3.488278000 | -2.502692000 | -1.620031000 | 8 | 4.868285000  | 3.108501000  | -3.009090000 |
| 6             | -4.802105000 | -4.282207000 | 0.059546000  | 6 | 5.453618000  | 4.379195000  | -3.019195000 |
| 6             | -4.740458000 | -2.986858000 | -1.968034000 | 1 | 5.431783000  | 4.844680000  | -2.018877000 |
| 6             | -5.407453000 | -3.878212000 | -1.127276000 | 1 | 6.496663000  | 4.244513000  | -3.324678000 |
| 1             | -3.084236000 | -4.125089000 | 1.352246000  | 1 | 4.952982000  | 5.048928000  | -3.738507000 |
| 1             | -2.962815000 | -1.793303000 | -2.269172000 | 8 | -7.231289000 | -1.509963000 | 0.477428000  |
| 1             | -5.315875000 | -4.984907000 | 0.721150000  | 6 | -8.329560000 | -1.652761000 | -0.374736000 |
| 1             | -5.199269000 | -2.667656000 | -2.908893000 | 1 | -8.881146000 | -0.704794000 | -0.494306000 |
| 1             | -6.390933000 | -4.269145000 | -1.403522000 | 1 | -8.014880000 | -2.014661000 | -1.370294000 |
| 7             | -2.794642000 | 1.442959000  | -0.879204000 | 1 | -8.993643000 | -2.393366000 | 0.083785000  |
| 29            | -0.944736000 | 0.525795000  | -0.887323000 | 8 | -2.648663000 | 5.090902000  | 1.980116000  |
| 6             | -2.730242000 | 2.595288000  | -1.464791000 | 6 | -2.477570000 | 6.469634000  | 1.825723000  |
| 7             | -0.440519000 | 2.219842000  | -1.787133000 | 1 | -2.213384000 | 6.733285000  | 0.786905000  |
| 6             | -1.424029000 | 3.066117000  | -1.847266000 | 1 | -3.435141000 | 6.938021000  | 2.077280000  |
| 1             | -3.621594000 | 3.209398000  | -1.661789000 | 1 | -1.699290000 | 6.860223000  | 2.503062000  |
| 1             | -1.296457000 | 4.089093000  | -2.228218000 | 8 | 4.921740000  | -5.419327000 | -1.618962000 |
| 6             | 0.878724000  | 2.527396000  | -2.096558000 | 6 | 4.138080000  | -6.563755000 | -1.807465000 |
| 6             | 1.411985000  | 3.822078000  | -2.041435000 | 1 | 3.625526000  | -6.859418000 | -0.876632000 |
| 6             | 1.724849000  | 1.462657000  | -2.456165000 | 1 | 3.386017000  | -6.411368000 | -2.599727000 |
| 6             | 2.749183000  | 4.053516000  | -2.332457000 | 1 | 4.819005000  | -7.365994000 | -2.110644000 |

|              |              |              |              |   |              |              |              |
|--------------|--------------|--------------|--------------|---|--------------|--------------|--------------|
| 7            | -0.851767000 | -3.324064000 | 1.481752000  | 6 | -4.073171000 | -0.330054000 | 0.426138000  |
| 7            | -0.087439000 | -2.728781000 | 2.131316000  | 6 | -5.186505000 | 0.575630000  | -1.525740000 |
| 7            | 0.619099000  | -1.677599000 | 2.141955000  | 6 | -5.210793000 | -1.027807000 | 0.757258000  |
| 6            | 1.185071000  | -1.257154000 | 3.419674000  | 6 | -6.321326000 | -0.160762000 | -1.222916000 |
| 1            | 0.624848000  | -0.376688000 | 3.788433000  | 6 | -6.337756000 | -0.975009000 | -0.079348000 |
| 1            | 1.043600000  | -2.059350000 | 4.163495000  | 1 | -3.170763000 | -0.396719000 | 1.044653000  |
| 1            | 3.177200000  | -2.813442000 | 2.445473000  | 1 | -5.158762000 | 1.172333000  | -2.442690000 |
| 6            | 3.543437000  | -1.831297000 | 2.768409000  | 1 | -5.255054000 | -1.667135000 | 1.642116000  |
| 6            | 2.639607000  | -0.900195000 | 3.286238000  | 1 | -7.180964000 | -0.119129000 | -1.894202000 |
| 6            | 3.106950000  | 0.353183000  | 3.682804000  | 6 | 3.456479000  | -1.360929000 | -0.402265000 |
| 1            | 2.398136000  | 1.085070000  | 4.087425000  | 6 | 4.789716000  | -1.287976000 | -0.857755000 |
| 6            | 4.453267000  | 0.681597000  | 3.548722000  | 6 | 2.788275000  | -2.592827000 | -0.481965000 |
| 1            | 4.810521000  | 1.665669000  | 3.865127000  | 6 | 5.419542000  | -2.407174000 | -1.354407000 |
| 6            | 5.346290000  | -0.248880000 | 3.019855000  | 6 | 3.420685000  | -3.727731000 | -0.963578000 |
| 1            | 6.406528000  | 0.002370000  | 2.924748000  | 6 | 4.748520000  | -3.643299000 | -1.403926000 |
| 1            | 5.588743000  | -2.249412000 | 2.235180000  | 1 | 5.332040000  | -0.338328000 | -0.841228000 |
| 6            | 4.889353000  | -1.509561000 | 2.635775000  | 1 | 1.751978000  | -2.653646000 | -0.124722000 |
| <b>IC-L2</b> |              |              |              | 1 | 6.446383000  | -2.368873000 | -1.725521000 |
| 7            | 2.761091000  | -0.293981000 | 0.132922000  | 1 | 2.874770000  | -4.672318000 | -0.994672000 |
| 29           | 0.722655000  | -0.396431000 | 0.701098000  | 6 | 0.156484000  | 2.486694000  | 1.365171000  |
| 6            | 3.297691000  | 0.834757000  | 0.470059000  | 6 | 0.263134000  | 3.858813000  | 1.101652000  |
| 7            | 1.177395000  | 1.569185000  | 1.149460000  | 6 | -1.097863000 | 1.979346000  | 1.764354000  |
| 6            | 2.415807000  | 1.875517000  | 0.924457000  | 6 | -0.843210000 | 4.693049000  | 1.196385000  |
| 1            | 4.375340000  | 1.041222000  | 0.398770000  | 6 | -2.200210000 | 2.801051000  | 1.871508000  |
| 1            | 2.810355000  | 2.896296000  | 1.043239000  | 6 | -2.089663000 | 4.167531000  | 1.574638000  |
| 6            | -0.779706000 | -1.294286000 | 0.075110000  | 1 | 1.218468000  | 4.286020000  | 0.784506000  |
| 6            | -1.306104000 | -2.465756000 | 0.430918000  | 1 | -1.178138000 | 0.907128000  | 1.989071000  |
| 6            | -2.510184000 | -3.048894000 | -0.190614000 | 1 | -0.729827000 | 5.757259000  | 0.978405000  |
| 6            | -3.301032000 | -3.959447000 | 0.519985000  | 1 | -3.175567000 | 2.413976000  | 2.179421000  |
| 6            | -2.938942000 | -2.624944000 | -1.458382000 | 8 | 4.845378000  | 2.966213000  | -2.870658000 |
| 6            | -4.506807000 | -4.406487000 | -0.012343000 | 6 | 5.403416000  | 4.249494000  | -2.882878000 |
| 6            | -4.146879000 | -3.065737000 | -1.981706000 | 1 | 5.338763000  | 4.729964000  | -1.891578000 |
| 6            | -4.939867000 | -3.955587000 | -1.256821000 | 1 | 6.458517000  | 4.133007000  | -3.152181000 |
| 1            | -2.962204000 | -4.298003000 | 1.502421000  | 1 | 4.912215000  | 4.896252000  | -3.629117000 |
| 1            | -2.306719000 | -1.937803000 | -2.033723000 | 8 | -7.361733000 | -1.743096000 | 0.273867000  |
| 1            | -5.117609000 | -5.114793000 | 0.554293000  | 6 | -8.509181000 | -1.771920000 | -0.525411000 |
| 1            | -4.467572000 | -2.724606000 | -2.970588000 | 1 | -8.984104000 | -0.778376000 | -0.589201000 |
| 1            | -5.887313000 | -4.312123000 | -1.670976000 | 1 | -8.280455000 | -2.128094000 | -1.544510000 |
| 7            | -2.853834000 | 1.119252000  | -1.041287000 | 1 | -9.207262000 | -2.470144000 | -0.051632000 |
| 29           | -0.993228000 | 0.302518000  | -0.849905000 | 8 | -3.204711000 | 4.887746000  | 1.678701000  |
| 6            | -2.783850000 | 2.290181000  | -1.591475000 | 6 | -3.152856000 | 6.269362000  | 1.469889000  |
| 7            | -0.471107000 | 1.979061000  | -1.768264000 | 1 | -2.846733000 | 6.514025000  | 0.438004000  |
| 6            | -1.475948000 | 2.784559000  | -1.930391000 | 1 | -4.164281000 | 6.653663000  | 1.639782000  |
| 1            | -3.677480000 | 2.902415000  | -1.780903000 | 1 | -2.460316000 | 6.759717000  | 2.174732000  |
| 1            | -1.358714000 | 3.790939000  | -2.356282000 | 8 | 5.445186000  | -4.664424000 | -1.889005000 |
| 6            | 0.849209000  | 2.308189000  | -2.050831000 | 6 | 4.844197000  | -5.925862000 | -1.977804000 |
| 6            | 1.346870000  | 3.617427000  | -2.014038000 | 1 | 4.539036000  | -6.297744000 | -0.985326000 |
| 6            | 1.727418000  | 1.258042000  | -2.371837000 | 1 | 3.963831000  | -5.907017000 | -2.641910000 |
| 6            | 2.686570000  | 3.874325000  | -2.272352000 | 1 | 5.594574000  | -6.603686000 | -2.398014000 |
| 6            | 3.048831000  | 1.508358000  | -2.670978000 | 7 | -0.813367000 | -3.206613000 | 1.544523000  |
| 6            | 3.548854000  | 2.817825000  | -2.609923000 | 7 | -0.063938000 | -2.670575000 | 2.384675000  |
| 1            | 0.684181000  | 4.444632000  | -1.740966000 | 7 | 0.520682000  | -1.529565000 | 2.243410000  |
| 1            | 1.338546000  | 0.232383000  | -2.383761000 | 6 | 1.092142000  | -0.978607000 | 3.464990000  |
| 1            | 3.056092000  | 4.900108000  | -2.213713000 | 1 | 0.595895000  | -0.013997000 | 3.687927000  |
| 1            | 3.735250000  | 0.699803000  | -2.939681000 | 1 | 0.850632000  | -1.663624000 | 4.296219000  |
| 6            | -4.043132000 | 0.485849000  | -0.720731000 | 1 | 2.923551000  | -2.702081000 | 2.483753000  |



|               |              |              |              |   |              |              |              |
|---------------|--------------|--------------|--------------|---|--------------|--------------|--------------|
| 6             | 3.385231000  | -1.762504000 | 2.809873000  | 1 | -5.260380000 | -1.986855000 | 1.613370000  |
| 6             | 2.576433000  | -0.759794000 | 3.349617000  | 1 | -7.217528000 | -0.407133000 | -1.892362000 |
| 6             | 3.163420000  | 0.436274000  | 3.765067000  | 6 | 3.641504000  | -1.174523000 | -0.380578000 |
| 1             | 2.531301000  | 1.223581000  | 4.192157000  | 6 | 4.983453000  | -0.999348000 | -0.774013000 |
| 6             | 4.533057000  | 0.639550000  | 3.619419000  | 6 | 3.076887000  | -2.453247000 | -0.488697000 |
| 1             | 4.985143000  | 1.578717000  | 3.951259000  | 6 | 5.724099000  | -2.069196000 | -1.225585000 |
| 6             | 5.328769000  | -0.355689000 | 3.051302000  | 6 | 3.817558000  | -3.538524000 | -0.928760000 |
| 1             | 6.404872000  | -0.197619000 | 2.936550000  | 6 | 5.157304000  | -3.354364000 | -1.297390000 |
| 1             | 5.373397000  | -2.350102000 | 2.218183000  | 1 | 5.452694000  | -0.012755000 | -0.742223000 |
| 6             | 4.752557000  | -1.561553000 | 2.655250000  | 1 | 2.030689000  | -2.593666000 | -0.183493000 |
| <b>TS2-L2</b> |              |              |              | 1 | 6.762573000  | -1.950706000 | -1.543327000 |
| 7             | 2.845629000  | -0.163151000 | 0.138897000  | 1 | 3.346804000  | -4.521667000 | -0.983297000 |
| 29            | 0.911543000  | -0.466165000 | 0.568396000  | 6 | 0.081150000  | 2.513001000  | 1.357557000  |
| 6             | 3.295191000  | 1.009775000  | 0.466307000  | 6 | 0.119229000  | 3.889281000  | 1.091186000  |
| 7             | 1.133589000  | 1.641604000  | 1.125852000  | 6 | -1.139151000 | 1.951678000  | 1.792701000  |
| 6             | 2.354446000  | 2.004723000  | 0.901074000  | 6 | -1.019374000 | 4.673963000  | 1.216150000  |
| 1             | 4.356508000  | 1.281269000  | 0.393662000  | 6 | -2.271236000 | 2.726426000  | 1.936641000  |
| 1             | 2.704725000  | 3.043780000  | 1.010109000  | 6 | -2.229356000 | 4.095439000  | 1.635186000  |
| 6             | -0.777780000 | -1.241093000 | 0.356943000  | 1 | 1.045953000  | 4.356373000  | 0.746454000  |
| 6             | -1.230440000 | -2.499084000 | 0.523855000  | 1 | -1.167544000 | 0.877172000  | 2.016282000  |
| 6             | -2.325103000 | -3.061133000 | -0.289990000 | 1 | -0.960418000 | 5.741469000  | 0.992587000  |
| 6             | -3.124554000 | -4.084736000 | 0.234837000  | 1 | -3.219420000 | 2.298214000  | 2.273200000  |
| 6             | -2.653362000 | -2.522494000 | -1.542877000 | 8 | 4.619158000  | 3.098071000  | -2.935060000 |
| 6             | -4.247698000 | -4.523550000 | -0.459096000 | 6 | 5.130096000  | 4.399672000  | -2.987850000 |
| 6             | -3.779707000 | -2.957560000 | -2.229215000 | 1 | 5.069302000  | 4.900286000  | -2.006291000 |
| 6             | -4.587449000 | -3.955238000 | -1.684703000 | 1 | 6.182744000  | 4.314863000  | -3.277906000 |
| 1             | -2.858953000 | -4.514628000 | 1.203956000  | 1 | 4.600123000  | 5.011516000  | -3.737038000 |
| 1             | -2.009849000 | -1.750678000 | -1.983209000 | 8 | -7.335897000 | -2.128529000 | 0.202068000  |
| 1             | -4.867641000 | -5.318231000 | -0.034880000 | 6 | -8.470916000 | -2.187282000 | -0.613964000 |
| 1             | -4.023876000 | -2.524568000 | -3.203724000 | 1 | -8.999783000 | -1.219818000 | -0.642066000 |
| 1             | -5.471170000 | -4.304001000 | -2.226575000 | 1 | -8.210934000 | -2.486877000 | -1.643469000 |
| 7             | -2.993736000 | 1.059071000  | -0.891834000 | 1 | -9.133583000 | -2.942875000 | -0.179045000 |
| 29            | -1.078224000 | 0.338427000  | -0.622353000 | 8 | -3.370235000 | 4.767279000  | 1.774477000  |
| 6             | -2.960584000 | 2.197660000  | -1.509690000 | 6 | -3.385580000 | 6.149072000  | 1.560832000  |
| 7             | -0.637596000 | 1.953519000  | -1.698821000 | 1 | -3.124598000 | 6.402839000  | 0.518822000  |
| 6             | -1.669848000 | 2.722330000  | -1.866763000 | 1 | -4.406695000 | 6.489526000  | 1.763192000  |
| 1             | -3.872330000 | 2.753891000  | -1.770804000 | 1 | -2.692312000 | 6.671817000  | 2.241231000  |
| 1             | -1.589824000 | 3.714252000  | -2.334072000 | 8 | 5.955896000  | -4.321208000 | -1.734379000 |
| 6             | 0.663804000  | 2.320737000  | -2.021315000 | 6 | 5.460687000  | -5.626669000 | -1.837854000 |
| 6             | 1.117397000  | 3.646179000  | -2.020432000 | 1 | 5.132140000  | -6.011984000 | -0.857995000 |
| 6             | 1.570012000  | 1.295538000  | -2.346170000 | 1 | 4.618872000  | -5.683468000 | -2.548232000 |
| 6             | 2.441780000  | 3.943737000  | -2.312421000 | 1 | 6.283096000  | -6.247582000 | -2.208249000 |
| 6             | 2.876637000  | 1.584469000  | -2.675547000 | 7 | -0.796516000 | -3.291679000 | 1.589431000  |
| 6             | 3.333090000  | 2.910692000  | -2.646728000 | 7 | -0.059045000 | -2.707156000 | 2.423062000  |
| 1             | 0.432663000  | 4.455202000  | -1.747239000 | 7 | 0.312269000  | -1.480974000 | 2.199925000  |
| 1             | 1.211987000  | 0.259223000  | -2.343487000 | 6 | 0.904758000  | -0.812267000 | 3.355659000  |
| 1             | 2.776874000  | 4.982468000  | -2.280668000 | 1 | 0.475244000  | 0.202087000  | 3.438088000  |
| 1             | 3.585095000  | 0.794931000  | -2.943955000 | 1 | 0.591496000  | -1.369417000 | 4.255809000  |
| 6             | -4.150449000 | 0.353391000  | -0.620652000 | 1 | 2.638269000  | -2.701801000 | 2.481802000  |
| 6             | -4.151109000 | -0.514059000 | 0.489440000  | 6 | 3.155437000  | -1.786313000 | 2.792639000  |
| 6             | -5.280859000 | 0.397361000  | -1.450725000 | 6 | 2.405548000  | -0.712049000 | 3.277820000  |
| 6             | -5.242832000 | -1.304376000 | 0.760451000  | 6 | 3.065085000  | 0.450151000  | 3.681257000  |
| 6             | -6.370300000 | -0.421338000 | -1.204329000 | 1 | 2.479115000  | 1.293461000  | 4.065336000  |
| 6             | -6.355861000 | -1.285544000 | -0.096652000 | 6 | 4.448889000  | 0.551054000  | 3.571877000  |
| 1             | -3.260001000 | -0.547446000 | 1.126672000  | 1 | 4.957596000  | 1.465438000  | 3.890950000  |
| 1             | -5.276362000 | 1.028362000  | -2.344490000 | 6 | 5.187136000  | -0.512845000 | 3.051322000  |

|             |              |              |              |              |              |              |              |
|-------------|--------------|--------------|--------------|--------------|--------------|--------------|--------------|
| 1           | 6.274027000  | -0.432866000 | 2.959911000  | 6            | 4.264903000  | 4.050132000  | 0.601110000  |
| 1           | 5.111747000  | -2.526453000 | 2.268798000  | 1            | 1.008970000  | 5.022161000  | 0.397266000  |
| 6           | 4.537888000  | -1.686509000 | 2.674958000  | 1            | 2.692449000  | 1.380640000  | 1.985918000  |
| <b>P-L2</b> |              |              |              | 1            | 3.301071000  | 5.817514000  | -0.148898000 |
| 7           | 0.452858000  | 2.551584000  | 1.387287000  | 1            | 4.957657000  | 2.168019000  | 1.459617000  |
| 29          | -0.011404000 | 0.614392000  | 0.823753000  | 6            | -3.046596000 | 0.476144000  | 1.078971000  |
| 6           | -0.651244000 | 3.218042000  | 1.536905000  | 6            | -4.345415000 | 0.976866000  | 1.259432000  |
| 7           | -1.884864000 | 1.233786000  | 1.202286000  | 6            | -2.915369000 | -0.879516000 | 0.722312000  |
| 6           | -1.890891000 | 2.501879000  | 1.491870000  | 6            | -5.461688000 | 0.174592000  | 1.068644000  |
| 1           | -0.665795000 | 4.306459000  | 1.694387000  | 6            | -4.014225000 | -1.685537000 | 0.523837000  |
| 1           | -2.817031000 | 3.063376000  | 1.667668000  | 6            | -5.307619000 | -1.165788000 | 0.688596000  |
| 6           | 1.542328000  | -0.441462000 | 0.182653000  | 1            | -4.511104000 | 2.015745000  | 1.552792000  |
| 6           | 2.813072000  | -0.044043000 | -0.297443000 | 1            | -1.903094000 | -1.283277000 | 0.588311000  |
| 6           | 3.189287000  | 0.970024000  | -1.277034000 | 1            | -6.454942000 | 0.601754000  | 1.220574000  |
| 6           | 4.527928000  | 1.091303000  | -1.681211000 | 1            | -3.911084000 | -2.738034000 | 0.246068000  |
| 6           | 2.260341000  | 1.901609000  | -1.756463000 | 8            | -4.673730000 | 3.891621000  | -1.950906000 |
| 6           | 4.916640000  | 2.120689000  | -2.531068000 | 6            | -6.059843000 | 3.901993000  | -2.136575000 |
| 6           | 2.651551000  | 2.930107000  | -2.604647000 | 1            | -6.576653000 | 3.304662000  | -1.365642000 |
| 6           | 3.984508000  | 3.047943000  | -2.993363000 | 1            | -6.383085000 | 4.945155000  | -2.053450000 |
| 1           | 5.256449000  | 0.367107000  | -1.305518000 | 1            | -6.337545000 | 3.518708000  | -3.132867000 |
| 1           | 1.221681000  | 1.832406000  | -1.412085000 | 8            | 3.654531000  | -6.648198000 | -0.221757000 |
| 1           | 5.962437000  | 2.198822000  | -2.843155000 | 6            | 3.342515000  | -8.002332000 | -0.060214000 |
| 1           | 1.912971000  | 3.654756000  | -2.959138000 | 1            | 2.602109000  | -8.153806000 | 0.743505000  |
| 1           | 4.294507000  | 3.856885000  | -3.659626000 | 1            | 2.955827000  | -8.442126000 | -0.994958000 |
| 7           | -0.061717000 | -2.831511000 | -1.640947000 | 1            | 4.273290000  | -8.509815000 | 0.214250000  |
| 29          | 0.056061000  | -0.846076000 | -1.036766000 | 8            | -6.315838000 | -2.007611000 | 0.471516000  |
| 6           | -1.166931000 | -3.021651000 | -2.293097000 | 6            | -7.630096000 | -1.567866000 | 0.662395000  |
| 7           | -1.633709000 | -0.719501000 | -2.118696000 | 1            | -7.884557000 | -0.740153000 | -0.021502000 |
| 6           | -2.028019000 | -1.896209000 | -2.509768000 | 1            | -8.283801000 | -2.419792000 | 0.447067000  |
| 1           | -1.451283000 | -4.002856000 | -2.700152000 | 1            | -7.799880000 | -1.239435000 | 1.701641000  |
| 1           | -2.990377000 | -2.054944000 | -3.013694000 | 8            | 5.430594000  | 4.531948000  | 0.191669000  |
| 6           | -2.453294000 | 0.403363000  | -2.163473000 | 6            | 6.587360000  | 3.762041000  | 0.368817000  |
| 6           | -3.848266000 | 0.345731000  | -2.314707000 | 1            | 6.796047000  | 3.590643000  | 1.438207000  |
| 6           | -1.859562000 | 1.660324000  | -1.956875000 | 1            | 6.500055000  | 2.788122000  | -0.143623000 |
| 6           | -4.620954000 | 1.493747000  | -2.256807000 | 1            | 7.414319000  | 4.330353000  | -0.069781000 |
| 6           | -2.618172000 | 2.809329000  | -1.899516000 | 7            | 3.778516000  | -0.730858000 | 0.367466000  |
| 6           | -4.011708000 | 2.739814000  | -2.040958000 | 7            | 3.233820000  | -1.522965000 | 1.230058000  |
| 1           | -4.356400000 | -0.615980000 | -2.426722000 | 7            | 1.913398000  | -1.385518000 | 1.120894000  |
| 1           | -0.772101000 | 1.703317000  | -1.840253000 | 6            | 1.031176000  | -2.164137000 | 1.952995000  |
| 1           | -5.705294000 | 1.410689000  | -2.353184000 | 1            | 0.366203000  | -2.768668000 | 1.303706000  |
| 1           | -2.162093000 | 3.790977000  | -1.749369000 | 1            | 1.673224000  | -2.865429000 | 2.511918000  |
| 6           | 0.827495000  | -3.844650000 | -1.324659000 | 1            | 1.811464000  | 0.079234000  | 3.274159000  |
| 6           | 2.175340000  | -3.500372000 | -1.102022000 | 6            | 0.756041000  | -0.149213000 | 3.452280000  |
| 6           | 0.440632000  | -5.185180000 | -1.162434000 | 6            | 0.202999000  | -1.300043000 | 2.874356000  |
| 6           | 3.099327000  | -4.455368000 | -0.743783000 | 6            | -1.116349000 | -1.637713000 | 3.183079000  |
| 6           | 1.361851000  | -6.150503000 | -0.790779000 | 1            | -1.554594000 | -2.545824000 | 2.754431000  |
| 6           | 2.704583000  | -5.793283000 | -0.581820000 | 6            | -1.884102000 | -0.819695000 | 4.006560000  |
| 1           | 2.486367000  | -2.462582000 | -1.257143000 | 1            | -2.921006000 | -1.091618000 | 4.224512000  |
| 1           | -0.608508000 | -5.471364000 | -1.279723000 | 6            | -1.340092000 | 0.347736000  | 4.536834000  |
| 1           | 4.147094000  | -4.195813000 | -0.576089000 | 1            | -1.945478000 | 0.992626000  | 5.179459000  |
| 1           | 1.027627000  | -7.179235000 | -0.643481000 | 1            | 0.434084000  | 1.572715000  | 4.705959000  |
| 6           | 1.695334000  | 3.134159000  | 1.234319000  | 6            | -0.012458000 | 0.675005000  | 4.269015000  |
| 6           | 1.877138000  | 4.413468000  | 0.665794000  | <b>Ac-L3</b> |              |              |              |
| 6           | 2.829644000  | 2.366440000  | 1.536255000  | 7            | -0.440576000 | 1.878174000  | 2.008359000  |
| 6           | 3.139150000  | 4.858122000  | 0.347786000  | 29           | -0.758305000 | 0.146552000  | 1.040856000  |
| 6           | 4.103779000  | 2.813882000  | 1.242800000  | 6            | -1.484787000 | 2.314981000  | 2.606769000  |

|    |              |              |              |   |              |              |              |
|----|--------------|--------------|--------------|---|--------------|--------------|--------------|
| 7  | -2.680636000 | 0.483122000  | 1.790980000  | 6 | 1.959227000  | 4.832088000  | 1.681948000  |
| 6  | -2.731341000 | 1.554741000  | 2.480456000  | 6 | 2.929014000  | 4.161869000  | 0.709195000  |
| 1  | -1.481630000 | 3.242707000  | 3.199453000  | 1 | 2.518076000  | 4.193536000  | -0.319366000 |
| 1  | -3.644123000 | 1.932638000  | 2.964260000  | 1 | 3.839432000  | 2.214298000  | 0.429688000  |
| 6  | -0.426143000 | -1.491165000 | 0.149770000  | 1 | 3.887668000  | 4.708383000  | 0.689026000  |
| 6  | -0.541422000 | -2.704700000 | -0.096534000 | 6 | 3.147781000  | 2.711041000  | 1.135197000  |
| 6  | -0.560339000 | -4.102159000 | -0.318103000 | 6 | 3.718355000  | 2.655226000  | 2.552880000  |
| 6  | 0.228402000  | -4.948124000 | 0.489761000  | 1 | 3.891458000  | 1.604526000  | 2.850257000  |
| 6  | -1.341992000 | -4.678135000 | -1.339372000 | 1 | 4.696554000  | 3.164687000  | 2.594523000  |
| 6  | 0.224481000  | -6.320104000 | 0.284566000  | 6 | 2.531563000  | 4.781822000  | 3.100232000  |
| 6  | -1.329810000 | -6.050467000 | -1.543017000 | 1 | 1.848049000  | 5.289497000  | 3.803829000  |
| 6  | -0.551526000 | -6.875175000 | -0.732158000 | 6 | 2.740147000  | 3.325872000  | 3.521037000  |
| 1  | 0.832246000  | -4.500468000 | 1.285524000  | 1 | 3.147930000  | 3.288985000  | 4.545297000  |
| 1  | -1.949194000 | -4.025946000 | -1.973533000 | 6 | 1.397476000  | 2.590508000  | 3.499239000  |
| 1  | 0.833461000  | -6.966575000 | 0.922086000  | 1 | 1.517250000  | 1.537272000  | 3.811967000  |
| 1  | -1.936783000 | -6.485712000 | -2.341250000 | 1 | 0.687431000  | 3.063137000  | 4.204020000  |
| 1  | -0.549857000 | -7.956285000 | -0.893319000 | 1 | 3.489877000  | 5.327604000  | 3.140194000  |
| 7  | 0.766860000  | 1.233350000  | -2.189825000 | 1 | -5.443234000 | -3.600374000 | -0.053726000 |
| 29 | 0.688591000  | -0.313689000 | -0.881658000 | 6 | -0.379589000 | 2.037923000  | -2.591487000 |
| 6  | 1.980113000  | 1.583429000  | -2.423542000 | 6 | -0.038301000 | 3.480673000  | -2.966739000 |
| 7  | 2.710480000  | -0.287756000 | -1.205605000 | 1 | 0.474717000  | 3.967140000  | -2.110024000 |
| 6  | 3.042028000  | 0.694960000  | -1.957540000 | 1 | 0.658322000  | 3.502870000  | -3.824535000 |
| 1  | 2.254010000  | 2.506425000  | -2.953630000 | 1 | -1.635213000 | 0.992817000  | -1.180891000 |
| 1  | 4.080476000  | 0.894898000  | -2.267923000 | 6 | -1.379410000 | 2.044567000  | -1.424631000 |
| 6  | -3.816290000 | -0.375746000 | 1.531278000  | 1 | -0.891149000 | 2.486796000  | -0.533090000 |
| 6  | -3.929446000 | -0.497142000 | -0.000098000 | 1 | -1.043691000 | 5.273347000  | -3.617663000 |
| 1  | -4.140911000 | 0.507551000  | -0.417092000 | 6 | -1.312022000 | 4.238687000  | -3.345463000 |
| 1  | -2.956934000 | -0.837655000 | -0.404146000 | 6 | -2.278923000 | 4.249459000  | -2.162344000 |
| 1  | -5.075878000 | 0.207498000  | 3.201310000  | 1 | -1.813256000 | 4.755099000  | -1.295818000 |
| 6  | -5.147019000 | 0.111068000  | 2.100910000  | 1 | -3.332624000 | 2.802255000  | -0.934180000 |
| 1  | -5.389138000 | 1.112872000  | 1.695524000  | 1 | -3.186414000 | 4.823321000  | -2.417930000 |
| 1  | -5.105591000 | -1.559056000 | -1.456968000 | 6 | -2.643510000 | 2.811155000  | -1.799217000 |
| 6  | -5.035925000 | -1.486610000 | -0.357834000 | 6 | -3.298876000 | 2.116252000  | -2.993989000 |
| 6  | -6.364489000 | -0.995626000 | 0.215998000  | 1 | -3.580586000 | 1.082113000  | -2.722374000 |
| 1  | -6.630134000 | -0.016491000 | -0.221604000 | 1 | -4.228133000 | 2.639536000  | -3.278741000 |
| 1  | -7.208533000 | -0.522274000 | 2.154736000  | 6 | -1.963255000 | 3.543498000  | -4.543582000 |
| 1  | -7.176424000 | -1.694213000 | -0.050773000 | 1 | -1.277153000 | 3.555721000  | -5.408992000 |
| 6  | -6.254009000 | -0.884806000 | 1.737356000  | 6 | -2.322567000 | 2.104108000  | -4.171460000 |
| 6  | -5.921150000 | -2.258084000 | 2.323691000  | 1 | -2.788391000 | 1.600688000  | -5.035527000 |
| 1  | -5.865901000 | -2.201259000 | 3.425452000  | 6 | -1.054304000 | 1.340685000  | -3.785361000 |
| 1  | -6.726464000 | -2.973201000 | 2.081834000  | 1 | -1.284037000 | 0.296498000  | -3.501542000 |
| 6  | -4.681607000 | -2.853814000 | 0.230473000  | 1 | -0.344143000 | 1.302634000  | -4.631302000 |
| 1  | -3.713652000 | -3.202511000 | -0.177722000 | 6 | 3.704512000  | -1.248696000 | -0.723588000 |
| 6  | -4.590538000 | -2.746778000 | 1.753426000  | 6 | 2.968187000  | -2.393083000 | -0.024303000 |
| 1  | -4.337664000 | -3.732125000 | 2.180194000  | 1 | 2.342638000  | -1.968670000 | 0.786392000  |
| 6  | -3.486153000 | -1.758822000 | 2.123059000  | 1 | 2.271970000  | -2.869378000 | -0.742348000 |
| 1  | -3.394755000 | -1.662060000 | 3.220532000  | 1 | 5.161455000  | 0.276243000  | -0.203936000 |
| 1  | -2.508422000 | -2.091902000 | 1.734073000  | 6 | 4.632190000  | -0.561430000 | 0.291299000  |
| 6  | 0.818982000  | 2.632376000  | 2.078083000  | 1 | 4.018357000  | -0.131047000 | 1.106668000  |
| 6  | 0.618722000  | 4.097359000  | 1.654190000  | 1 | 3.419438000  | -4.226355000 | 1.019496000  |
| 1  | 0.180403000  | 4.122358000  | 0.635979000  | 6 | 3.969617000  | -3.407581000 | 0.524458000  |
| 1  | -0.094365000 | 4.602672000  | 2.329901000  | 6 | 4.884986000  | -2.714202000 | 1.534248000  |
| 1  | 1.926908000  | 0.911815000  | 1.382226000  | 1 | 4.291948000  | -2.322826000 | 2.380231000  |
| 6  | 1.809383000  | 1.982899000  | 1.115642000  | 1 | 6.293856000  | -1.065671000 | 1.567611000  |
| 1  | 1.360423000  | 2.019099000  | 0.106160000  | 1 | 5.605560000  | -3.436348000 | 1.955883000  |
| 1  | 1.795411000  | 5.881567000  | 1.383861000  | 6 | 5.635889000  | -1.574984000 | 0.842619000  |

|              |              |              |              |   |              |              |              |
|--------------|--------------|--------------|--------------|---|--------------|--------------|--------------|
| 6            | 6.471420000  | -2.136762000 | -0.308838000 | 1 | 1.281221000  | -4.775220000 | 2.176857000  |
| 1            | 7.036270000  | -1.325453000 | -0.802405000 | 6 | -0.349384000 | 0.497153000  | 3.168311000  |
| 1            | 7.216953000  | -2.851331000 | 0.080562000  | 6 | 0.152097000  | 0.325698000  | 4.606636000  |
| 6            | 4.802691000  | -3.970987000 | -0.627395000 | 1 | 0.814433000  | -0.559837000 | 4.662110000  |
| 1            | 4.149367000  | -4.490565000 | -1.350355000 | 1 | 0.747270000  | 1.200238000  | 4.923439000  |
| 6            | 5.554700000  | -2.832226000 | -1.316470000 | 1 | -1.555092000 | -0.560602000 | 1.734723000  |
| 1            | 6.154877000  | -3.232012000 | -2.151447000 | 6 | -1.197200000 | -0.715418000 | 2.773713000  |
| 6            | 4.553110000  | -1.817226000 | -1.871297000 | 1 | -0.567106000 | -1.625387000 | 2.764469000  |
| 1            | 5.097369000  | -1.004035000 | -2.385230000 | 1 | -0.666849000 | 0.053191000  | 6.581768000  |
| 1            | 3.884881000  | -2.287971000 | -2.615385000 | 6 | -1.043017000 | 0.174150000  | 5.551933000  |
| 1            | 5.519299000  | -4.720213000 | -0.248269000 | 6 | -1.867928000 | -1.049270000 | 5.154873000  |
| 1            | -2.870563000 | 4.091944000  | -4.850326000 | 1 | -1.254002000 | -1.964540000 | 5.228294000  |
| <b>RC-L3</b> |              |              |              | 1 | -2.968677000 | -1.757010000 | 3.428113000  |
| 7            | -3.301594000 | 0.888064000  | -0.226433000 | 1 | -2.714154000 | -1.176911000 | 5.851856000  |
| 29           | -1.240688000 | 0.888371000  | -0.660372000 | 6 | -2.380734000 | -0.871322000 | 3.726058000  |
| 6            | -3.687065000 | 2.072695000  | 0.068194000  | 6 | -3.251282000 | 0.383120000  | 3.637270000  |
| 7            | -1.535038000 | 2.847099000  | -0.483113000 | 1 | -3.632617000 | 0.503867000  | 2.604148000  |
| 6            | -2.686625000 | 3.134710000  | 0.007200000  | 1 | -4.130067000 | 0.288571000  | 4.298706000  |
| 1            | -4.729859000 | 2.338601000  | 0.296196000  | 6 | -1.911429000 | 1.431349000  | 5.466893000  |
| 1            | -2.958254000 | 4.149535000  | 0.336087000  | 1 | -1.329942000 | 2.318562000  | 5.775392000  |
| 6            | -0.273617000 | -0.688507000 | -1.194616000 | 6 | -2.423727000 | 1.605868000  | 4.035965000  |
| 6            | -0.565283000 | -1.442217000 | -2.140476000 | 1 | -3.044773000 | 2.516430000  | 3.970491000  |
| 6            | -1.050505000 | -2.293657000 | -3.163332000 | 6 | -1.234686000 | 1.749100000  | 3.086841000  |
| 6            | -1.728290000 | -1.750884000 | -4.274440000 | 1 | -1.566227000 | 1.861448000  | 2.036308000  |
| 6            | -0.950919000 | -3.695102000 | -3.055587000 | 1 | -0.628513000 | 2.639452000  | 3.345084000  |
| 6            | -2.315743000 | -2.582973000 | -5.217071000 | 6 | 3.711184000  | 0.469778000  | -0.643143000 |
| 6            | -1.528304000 | -4.515954000 | -4.014015000 | 6 | 4.621967000  | 1.689656000  | -0.797010000 |
| 6            | -2.223153000 | -3.968069000 | -5.090654000 | 1 | 4.000142000  | 2.582828000  | -0.997486000 |
| 1            | -1.795628000 | -0.663460000 | -4.373452000 | 1 | 5.181748000  | 1.878778000  | 0.137571000  |
| 1            | -0.423610000 | -4.128694000 | -2.202361000 | 1 | 2.352326000  | -0.716755000 | -1.826075000 |
| 1            | -2.846031000 | -2.145328000 | -6.067354000 | 6 | 2.987817000  | 0.178282000  | -1.963892000 |
| 1            | -1.442146000 | -5.601360000 | -3.915145000 | 1 | 2.303348000  | 1.015683000  | -2.202215000 |
| 1            | -2.684651000 | -4.620046000 | -5.836456000 | 1 | 6.261653000  | 2.347225000  | -2.034334000 |
| 7            | 2.704479000  | 0.589043000  | 0.396281000  | 6 | 5.624538000  | 1.452700000  | -1.929142000 |
| 29           | 0.668309000  | -0.227653000 | 0.404622000  | 6 | 4.878128000  | 1.189700000  | -3.236462000 |
| 6            | 2.830587000  | 1.363686000  | 1.405478000  | 1 | 4.254892000  | 2.064145000  | -3.500690000 |
| 7            | 0.727402000  | 0.633497000  | 2.183565000  | 1 | 3.456279000  | -0.248416000 | -4.020153000 |
| 6            | 1.789805000  | 1.309444000  | 2.430672000  | 1 | 5.598387000  | 1.051348000  | -4.061401000 |
| 1            | 3.689684000  | 2.034577000  | 1.564248000  | 6 | 4.000265000  | -0.051612000 | -3.081308000 |
| 1            | 1.949925000  | 1.840454000  | 3.381063000  | 6 | 4.860455000  | -1.263785000 | -2.721186000 |
| 7            | 1.808131000  | -3.391193000 | -1.052151000 | 1 | 4.221565000  | -2.159987000 | -2.617408000 |
| 7            | 1.443790000  | -2.155651000 | 0.917771000  | 1 | 5.584428000  | -1.474969000 | -3.527009000 |
| 7            | 1.705330000  | -2.844076000 | -0.071940000 | 6 | 6.491152000  | 0.242879000  | -1.574601000 |
| 6            | 3.075406000  | -3.568931000 | 2.168884000  | 1 | 7.054224000  | 0.437174000  | -0.644001000 |
| 6            | 2.377159000  | -4.781588000 | 2.194911000  | 6 | 5.603722000  | -0.991222000 | -1.412292000 |
| 6            | 4.470863000  | -3.585102000 | 2.186491000  | 1 | 6.220884000  | -1.865672000 | -1.143402000 |
| 6            | 3.066077000  | -5.986851000 | 2.245689000  | 6 | 4.587061000  | -0.751458000 | -0.295235000 |
| 6            | 5.161353000  | -4.793119000 | 2.245044000  | 1 | 3.947160000  | -1.644387000 | -0.165985000 |
| 1            | 5.020559000  | -2.637528000 | 2.160620000  | 1 | 5.093845000  | -0.560992000 | 0.672486000  |
| 6            | 4.459865000  | -5.993792000 | 2.273232000  | 1 | 7.238320000  | 0.066598000  | -2.367509000 |
| 1            | 2.513729000  | -6.929791000 | 2.268199000  | 1 | -2.761780000 | 1.350103000  | 6.165631000  |
| 1            | 6.254170000  | -4.795650000 | 2.264798000  | 6 | -0.506669000 | 3.879156000  | -0.630663000 |
| 1            | 5.000624000  | -6.942737000 | 2.315622000  | 6 | 0.674290000  | 3.280910000  | -1.396772000 |
| 6            | 2.330468000  | -2.269589000 | 2.090540000  | 1 | 1.053919000  | 2.413687000  | -0.817149000 |
| 1            | 3.037501000  | -1.417851000 | 2.077733000  | 1 | 0.321208000  | 2.886644000  | -2.368742000 |
| 1            | 1.669546000  | -2.116308000 | 2.962480000  | 1 | -0.846293000 | 4.717776000  | 1.349002000  |

|               |              |              |              |    |              |              |              |
|---------------|--------------|--------------|--------------|----|--------------|--------------|--------------|
| 6             | -0.003037000 | 4.321747000  | 0.750003000  | 6  | 2.137698000  | 3.859394000  | 1.028906000  |
| 1             | 0.383537000  | 3.424565000  | 1.275105000  | 6  | 2.012175000  | 4.689139000  | -1.241846000 |
| 1             | 2.606796000  | 3.877477000  | -2.148977000 | 6  | 3.092129000  | 4.816647000  | 1.331918000  |
| 6             | 1.772496000  | 4.326736000  | -1.579066000 | 6  | 2.976367000  | 5.641066000  | -0.927647000 |
| 6             | 2.259426000  | 4.776299000  | -0.200016000 | 6  | 3.522224000  | 5.711144000  | 0.350992000  |
| 1             | 2.677976000  | 3.914214000  | 0.353111000  | 1  | 1.800808000  | 3.145047000  | 1.788502000  |
| 1             | 1.438761000  | 5.694416000  | 1.584278000  | 1  | 1.597792000  | 4.642921000  | -2.249146000 |
| 1             | 3.070637000  | 5.518711000  | -0.300505000 | 1  | 3.508617000  | 4.866828000  | 2.341726000  |
| 6             | 1.092312000  | 5.376384000  | 0.585687000  | 1  | 3.306319000  | 6.341949000  | -1.699195000 |
| 6             | 0.536133000  | 6.580913000  | -0.175514000 | 1  | 4.278609000  | 6.464172000  | 0.586183000  |
| 1             | -0.297451000 | 7.037531000  | 0.387567000  | 7  | 2.247766000  | -1.095025000 | -0.756304000 |
| 1             | 1.315501000  | 7.356253000  | -0.272783000 | 29 | 0.195465000  | -0.190295000 | -0.892560000 |
| 6             | 1.221584000  | 5.530927000  | -2.343317000 | 6  | 2.122991000  | -2.364279000 | -0.799073000 |
| 1             | 0.884426000  | 5.223618000  | -3.348813000 | 7  | -0.235201000 | -2.145932000 | -0.844886000 |
| 6             | 0.058297000  | 6.138126000  | -1.559758000 | 6  | 0.780068000  | -2.930004000 | -0.894508000 |
| 1             | -0.347307000 | 7.005555000  | -2.107382000 | 1  | 2.977212000  | -3.062334000 | -0.749955000 |
| 6             | -1.047681000 | 5.095916000  | -1.397062000 | 1  | 0.671880000  | -4.025114000 | -0.950510000 |
| 1             | -1.898125000 | 5.545092000  | -0.853930000 | 7  | 0.238067000  | 2.735081000  | -2.471353000 |
| 1             | -1.426582000 | 4.762314000  | -2.380264000 | 7  | -0.248299000 | 0.489702000  | -2.703908000 |
| 6             | -4.220443000 | -0.206876000 | -0.483537000 | 7  | -0.046257000 | 1.716063000  | -2.962887000 |
| 6             | -3.675621000 | -1.485570000 | 0.165379000  | 6  | 0.316625000  | -1.431101000 | -4.181499000 |
| 1             | -2.624420000 | -1.625140000 | -0.152838000 | 6  | 1.677349000  | -1.323405000 | -3.901421000 |
| 1             | -3.682821000 | -1.361815000 | 1.264440000  | 6  | -0.148864000 | -2.575369000 | -4.838334000 |
| 1             | -4.566561000 | 0.538712000  | -2.488953000 | 6  | 2.547964000  | -2.360054000 | -4.235007000 |
| 6             | -4.200016000 | -0.391673000 | -2.015956000 | 6  | 0.716082000  | -3.608922000 | -5.173790000 |
| 1             | -3.152119000 | -0.538947000 | -2.335160000 | 1  | -1.212673000 | -2.653866000 | -5.089967000 |
| 1             | -4.131247000 | -3.589413000 | 0.247754000  | 6  | 2.070111000  | -3.507445000 | -4.860677000 |
| 6             | -4.538343000 | -2.683008000 | -0.232070000 | 1  | 3.616524000  | -2.269531000 | -4.021243000 |
| 6             | -4.516981000 | -2.850253000 | -1.752210000 | 1  | 0.334568000  | -4.496426000 | -5.685563000 |
| 1             | -3.487786000 | -3.041970000 | -2.106421000 | 1  | 2.757134000  | -4.316010000 | -5.123824000 |
| 1             | -5.038319000 | -1.692966000 | -3.506899000 | 6  | -0.653973000 | -0.331653000 | -3.838775000 |
| 1             | -5.125802000 | -3.723289000 | -2.045271000 | 1  | -1.640326000 | -0.782900000 | -3.616498000 |
| 6             | -5.068528000 | -1.585105000 | -2.407879000 | 1  | 2.050125000  | -0.418867000 | -3.405646000 |
| 6             | -6.503513000 | -1.343892000 | -1.938619000 | 6  | -3.564599000 | 2.184100000  | 0.627003000  |
| 1             | -6.921139000 | -0.443560000 | -2.424122000 | 6  | -3.352851000 | 1.833081000  | -0.858900000 |
| 1             | -7.146169000 | -2.191812000 | -2.232568000 | 1  | -2.270479000 | 1.699839000  | -1.055215000 |
| 6             | -5.971989000 | -2.444134000 | 0.242690000  | 1  | -3.854860000 | 0.868557000  | -1.061565000 |
| 1             | -5.999064000 | -2.343429000 | 1.342862000  | 1  | -3.010882000 | 3.767657000  | 1.996199000  |
| 6             | -6.522419000 | -1.179490000 | -0.416652000 | 6  | -2.875625000 | 3.528498000  | 0.925536000  |
| 1             | -7.556312000 | -1.000457000 | -0.075788000 | 1  | -1.790966000 | 3.418496000  | 0.741472000  |
| 6             | -5.661235000 | 0.028474000  | -0.033061000 | 1  | -3.779542000 | 2.667217000  | -2.795062000 |
| 1             | -6.074350000 | 0.930898000  | -0.521268000 | 6  | -3.942388000 | 2.934801000  | -1.736627000 |
| 1             | -5.688565000 | 0.201211000  | 1.061600000  | 6  | -3.240898000 | 4.256968000  | -1.424935000 |
| 1             | -6.608790000 | -3.308492000 | -0.014129000 | 1  | -2.156608000 | 4.163402000  | -1.624564000 |
| 1             | 2.015213000  | 6.284170000  | -2.488745000 | 1  | -2.972421000 | 5.575779000  | 0.273250000  |
| <b>TS1-L3</b> |              |              |              | 1  | -3.625968000 | 5.055478000  | -2.082389000 |
| 7             | -2.868579000 | 1.190299000  | 1.412742000  | 6  | -3.473064000 | 4.620465000  | 0.041867000  |
| 29            | -0.819238000 | 0.730756000  | 1.195620000  | 6  | -4.971108000 | 4.735406000  | 0.325746000  |
| 6             | -3.412016000 | 0.392419000  | 2.245255000  | 1  | -5.416357000 | 5.535575000  | -0.290619000 |
| 7             | -1.255221000 | -0.439302000 | 2.735659000  | 6  | -5.440523000 | 3.053189000  | -1.456021000 |
| 6             | -2.509938000 | -0.502767000 | 2.989130000  | 1  | -5.951226000 | 2.104932000  | -1.703588000 |
| 1             | -4.492611000 | 0.362336000  | 2.457351000  | 6  | -5.656895000 | 3.403133000  | 0.017013000  |
| 1             | -2.933432000 | -1.161385000 | 3.761015000  | 1  | -6.737059000 | 3.482828000  | 0.226230000  |
| 6             | 0.209051000  | 1.572118000  | -0.124183000 | 6  | -5.062118000 | 2.299814000  | 0.899213000  |
| 6             | 0.672341000  | 2.692566000  | -0.502579000 | 1  | -5.235384000 | 2.530122000  | 1.968076000  |
| 6             | 1.580512000  | 3.774641000  | -0.267602000 | 1  | -5.560313000 | 1.333488000  | 0.684035000  |

|   |              |              |              |              |              |              |              |  |
|---|--------------|--------------|--------------|--------------|--------------|--------------|--------------|--|
| 1 | -5.888191000 | 3.832998000  | -2.096240000 | 1            | -2.452836000 | -0.907335000 | -1.615460000 |  |
| 6 | -0.237323000 | -1.126447000 | 3.523388000  | 1            | -3.549918000 | -4.715084000 | -2.826846000 |  |
| 6 | 0.854553000  | -1.654998000 | 2.581025000  | 6            | -3.341292000 | -4.102811000 | -1.933209000 |  |
| 1 | 0.422479000  | -2.398829000 | 1.888343000  | 6            | -4.322154000 | -2.928899000 | -1.874379000 |  |
| 1 | 1.220452000  | -0.812933000 | 1.956820000  | 1            | -4.234806000 | -2.313853000 | -2.788451000 |  |
| 1 | -1.525846000 | -1.879824000 | 5.105722000  | 1            | -4.717974000 | -1.221222000 | -0.589706000 |  |
| 6 | -0.770244000 | -2.262640000 | 4.395385000  | 1            | -5.359948000 | -3.303187000 | -1.839374000 |  |
| 1 | -1.268966000 | -3.020063000 | 3.758257000  | 6            | -4.021005000 | -2.079248000 | -0.639556000 |  |
| 1 | 2.755870000  | -2.658113000 | 2.688749000  | 6            | -4.169800000 | -2.935540000 | 0.618943000  |  |
| 6 | 1.992304000  | -2.275063000 | 3.389908000  | 1            | -5.205414000 | -3.306773000 | 0.709784000  |  |
| 6 | 1.443467000  | -3.423685000 | 4.236786000  | 6            | -3.485003000 | -4.960021000 | -0.675797000 |  |
| 1 | 1.011690000  | -4.205363000 | 3.585831000  | 1            | -2.793454000 | -5.820167000 | -0.719093000 |  |
| 1 | -0.021336000 | -3.709082000 | 5.807599000  | 6            | -3.189454000 | -4.106709000 | 0.557246000  |  |
| 1 | 2.258331000  | -3.899286000 | 4.809482000  | 1            | -3.284789000 | -4.721690000 | 1.468719000  |  |
| 6 | 0.378449000  | -2.885763000 | 5.192155000  | 6            | -1.764876000 | -3.557751000 | 0.479340000  |  |
| 6 | 0.988274000  | -1.814471000 | 6.098194000  | 1            | -1.562228000 | -2.912886000 | 1.356384000  |  |
| 1 | 1.798972000  | -2.250714000 | 6.706744000  | 1            | -1.028260000 | -4.382675000 | 0.492327000  |  |
| 6 | 2.608532000  | -1.211157000 | 4.298491000  | 1            | -4.505240000 | -5.376019000 | -0.611965000 |  |
| 1 | 3.028881000  | -0.385516000 | 3.695700000  | 1            | 4.613912000  | 1.675244000  | 1.722954000  |  |
| 6 | 1.535537000  | -0.670804000 | 5.243306000  | 1            | 0.228661000  | -1.436023000 | 6.805076000  |  |
| 1 | 1.967061000  | 0.109066000  | 5.893531000  | 1            | -5.138163000 | 5.016532000  | 1.380864000  |  |
| 6 | 0.400927000  | -0.051998000 | 4.425995000  | 1            | -3.968299000 | -2.325335000 | 1.520628000  |  |
| 1 | -0.377432000 | 0.372516000  | 5.086424000  | <b>IC-L3</b> |              |              |              |  |
| 1 | 0.773151000  | 0.771425000  | 3.784729000  | 7            | -3.029657000 | -0.032807000 | 1.317957000  |  |
| 1 | 3.443121000  | -1.641116000 | 4.878970000  | 29           | -0.984945000 | 0.412080000  | 1.076145000  |  |
| 6 | 3.567795000  | -0.478269000 | -0.596631000 | 6            | -3.166357000 | -1.003288000 | 2.136779000  |  |
| 6 | 4.539043000  | -0.877210000 | -1.718017000 | 7            | -0.874657000 | -0.793129000 | 2.651865000  |  |
| 1 | 4.672869000  | -1.975592000 | -1.739727000 | 6            | -1.990437000 | -1.357606000 | 2.937354000  |  |
| 1 | 4.113186000  | -0.570122000 | -2.689179000 | 1            | -4.111023000 | -1.547422000 | 2.290514000  |  |
| 1 | 3.460243000  | -0.603739000 | 1.553065000  | 1            | -2.108278000 | -2.060146000 | 3.774047000  |  |
| 6 | 4.177008000  | -0.876548000 | 0.756626000  | 6            | -0.530607000 | 1.374383000  | -0.459313000 |  |
| 1 | 4.321228000  | -1.973716000 | 0.797477000  | 6            | -0.713994000 | 2.484343000  | -1.171322000 |  |
| 1 | 6.570390000  | -0.485536000 | -2.316874000 | 6            | -1.194968000 | 3.764423000  | -0.625904000 |  |
| 6 | 5.884603000  | -0.177412000 | -1.509048000 | 6            | -1.049375000 | 4.051250000  | 0.740268000  |  |
| 6 | 6.472693000  | -0.574724000 | -0.155175000 | 6            | -1.841400000 | 4.694296000  | -1.449375000 |  |
| 1 | 6.649752000  | -1.664852000 | -0.118736000 | 6            | -1.565841000 | 5.223847000  | 1.275362000  |  |
| 1 | 5.927985000  | -0.450277000 | 1.939436000  | 6            | -2.352944000 | 5.869917000  | -0.909310000 |  |
| 1 | 7.453223000  | -0.088446000 | -0.012974000 | 6            | -2.224742000 | 6.136025000  | 0.452254000  |  |
| 6 | 5.512130000  | -0.158264000 | 0.959479000  | 1            | -0.508332000 | 3.339678000  | 1.377313000  |  |
| 6 | 5.301313000  | 1.357932000  | 0.915779000  | 1            | -1.937223000 | 4.478119000  | -2.517102000 |  |
| 1 | 6.260942000  | 1.874836000  | 1.090670000  | 1            | -1.443185000 | 5.437808000  | 2.340572000  |  |
| 6 | 5.676907000  | 1.337577000  | -1.556904000 | 1            | -2.858914000 | 6.588336000  | -1.560138000 |  |
| 1 | 5.270700000  | 1.635574000  | -2.539846000 | 1            | -2.627441000 | 7.061863000  | 0.871348000  |  |
| 6 | 4.718769000  | 1.753634000  | -0.441598000 | 7            | 2.663450000  | 0.007769000  | -0.568193000 |  |
| 1 | 4.544444000  | 2.845369000  | -0.474720000 | 29           | 0.407488000  | -0.163621000 | -0.895222000 |  |
| 6 | 3.384953000  | 1.034592000  | -0.609725000 | 6            | 3.137948000  | -1.159738000 | -0.765153000 |  |
| 1 | 2.711232000  | 1.291885000  | 0.226197000  | 7            | 0.944524000  | -2.072092000 | -0.792116000 |  |
| 1 | 2.866876000  | 1.334432000  | -1.545563000 | 6            | 2.208437000  | -2.290293000 | -0.787137000 |  |
| 1 | 6.645226000  | 1.855032000  | -1.442364000 | 1            | 4.211739000  | -1.373497000 | -0.902853000 |  |
| 1 | -0.815360000 | 0.320645000  | -4.714060000 | 1            | 2.623289000  | -3.311129000 | -0.762500000 |  |
| 6 | -1.593407000 | -2.712301000 | -0.794390000 | 7            | -0.457105000 | 2.529717000  | -2.573519000 |  |
| 6 | -1.910364000 | -3.569587000 | -2.024792000 | 7            | 0.005561000  | 0.324144000  | -2.719680000 |  |
| 1 | -1.792399000 | -2.944906000 | -2.925000000 | 7            | -0.219845000 | 1.498260000  | -3.219564000 |  |
| 1 | -1.190048000 | -4.403916000 | -2.113867000 | 6            | 1.421249000  | -1.261559000 | -4.021415000 |  |
| 1 | -2.337718000 | -0.941211000 | 0.151130000  | 6            | 2.554827000  | -0.472541000 | -3.838290000 |  |
| 6 | -2.589040000 | -1.558322000 | -0.730850000 | 6            | 1.576767000  | -2.555915000 | -4.528673000 |  |

|   |              |              |              |   |              |              |              |
|---|--------------|--------------|--------------|---|--------------|--------------|--------------|
| 6 | 3.822398000  | -0.980861000 | -4.118607000 | 1 | 0.284583000  | 1.266453000  | 3.715875000  |
| 6 | 2.839224000  | -3.069864000 | -4.799815000 | 1 | 3.709282000  | 0.419101000  | 5.028554000  |
| 1 | 0.689499000  | -3.165561000 | -4.730289000 | 6 | 3.526829000  | 1.185846000  | -0.481786000 |
| 6 | 3.969908000  | -2.284351000 | -4.583632000 | 6 | 4.637766000  | 1.245518000  | -1.540287000 |
| 1 | 4.707518000  | -0.351344000 | -3.988505000 | 1 | 5.292102000  | 0.356142000  | -1.480140000 |
| 1 | 2.942553000  | -4.084295000 | -5.194520000 | 1 | 4.182466000  | 1.260477000  | -2.543476000 |
| 1 | 4.964765000  | -2.680567000 | -4.803469000 | 1 | 3.382723000  | 1.139483000  | 1.672447000  |
| 6 | 0.043527000  | -0.727387000 | -3.726250000 | 6 | 4.180196000  | 1.194934000  | 0.911604000  |
| 1 | -0.601692000 | -1.561536000 | -3.394244000 | 1 | 4.813216000  | 0.291957000  | 1.019507000  |
| 1 | 2.427344000  | 0.551437000  | -3.466748000 | 1 | 6.260734000  | 2.536730000  | -2.120171000 |
| 6 | -4.078146000 | 0.458324000  | 0.447046000  | 6 | 5.471676000  | 2.515910000  | -1.349196000 |
| 6 | -3.749529000 | -0.010729000 | -0.986893000 | 6 | 6.108719000  | 2.511700000  | 0.039375000  |
| 1 | -2.707669000 | 0.258562000  | -1.241457000 | 1 | 6.782684000  | 1.643118000  | 0.149863000  |
| 1 | -3.828513000 | -1.115253000 | -1.012567000 | 1 | 5.456518000  | 2.450108000  | 2.106321000  |
| 1 | -4.233940000 | 2.307281000  | 1.554374000  | 1 | 6.728275000  | 3.414876000  | 0.175148000  |
| 6 | -4.006116000 | 1.987732000  | 0.521006000  | 6 | 5.007788000  | 2.465908000  | 1.097710000  |
| 1 | -2.970306000 | 2.292400000  | 0.305035000  | 6 | 4.101321000  | 3.689753000  | 0.951582000  |
| 1 | -4.480787000 | 0.287696000  | -2.985341000 | 1 | 4.687279000  | 4.611815000  | 1.109262000  |
| 6 | -4.734295000 | 0.625072000  | -1.965628000 | 6 | 4.567422000  | 3.739586000  | -1.502473000 |
| 6 | -4.615906000 | 2.148215000  | -1.881942000 | 1 | 4.121117000  | 3.760216000  | -2.512412000 |
| 1 | -3.582162000 | 2.460035000  | -2.128636000 | 6 | 3.468342000  | 3.695357000  | -0.441226000 |
| 1 | -4.892711000 | 3.712481000  | -0.406361000 | 1 | 2.806392000  | 4.570893000  | -0.547746000 |
| 1 | -5.281943000 | 2.620668000  | -2.624394000 | 6 | 2.640696000  | 2.424153000  | -0.610656000 |
| 6 | -4.978315000 | 2.613251000  | -0.471017000 | 1 | 1.853986000  | 2.366553000  | 0.165692000  |
| 6 | -6.395645000 | 2.165231000  | -0.111244000 | 1 | 2.123938000  | 2.402329000  | -1.592321000 |
| 1 | -7.130113000 | 2.613318000  | -0.802754000 | 1 | 5.161799000  | 4.663818000  | -1.397814000 |
| 6 | -6.154767000 | 0.187767000  | -1.611102000 | 1 | -0.418277000 | -0.333013000 | -4.648116000 |
| 1 | -6.249250000 | -0.909825000 | -1.697880000 | 6 | -0.002085000 | -3.194616000 | -0.659401000 |
| 6 | -6.485028000 | 0.638842000  | -0.187159000 | 6 | 0.145217000  | -4.196847000 | -1.809176000 |
| 1 | -7.504359000 | 0.312116000  | 0.079618000  | 1 | -0.034691000 | -3.666760000 | -2.758661000 |
| 6 | -5.493098000 | -0.005308000 | 0.791514000  | 1 | 1.177265000  | -4.591649000 | -1.849199000 |
| 1 | -5.735688000 | 0.274941000  | 1.834600000  | 1 | -1.522445000 | -1.913911000 | 0.161173000  |
| 1 | -5.570343000 | -1.107305000 | 0.715683000  | 6 | -1.427192000 | -2.641108000 | -0.667676000 |
| 1 | -6.877166000 | 0.627097000  | -2.320556000 | 1 | -1.605163000 | -2.075254000 | -1.602381000 |
| 6 | 0.301997000  | -0.893260000 | 3.512601000  | 1 | -0.736110000 | -6.046342000 | -2.474987000 |
| 6 | 1.562798000  | -0.869505000 | 2.640322000  | 6 | -0.861365000 | -5.335886000 | -1.640594000 |
| 1 | 1.568108000  | -1.738437000 | 1.957479000  | 6 | -2.280613000 | -4.764659000 | -1.659848000 |
| 1 | 1.521987000  | 0.034549000  | 1.997990000  | 1 | -2.477176000 | -4.263370000 | -2.624309000 |
| 1 | -0.568486000 | -2.108767000 | 5.096513000  | 1 | -3.463158000 | -3.346656000 | -0.518999000 |
| 6 | 0.311027000  | -2.118763000 | 4.427806000  | 1 | -3.019113000 | -5.579661000 | -1.567603000 |
| 1 | 0.253581000  | -3.042135000 | 3.818392000  | 6 | -2.442952000 | -3.772435000 | -0.507857000 |
| 1 | 3.704683000  | -0.866176000 | 2.871170000  | 6 | -2.198521000 | -4.487741000 | 0.820977000  |
| 6 | 2.811602000  | -0.863673000 | 3.520103000  | 1 | -2.938658000 | -5.293997000 | 0.964351000  |
| 6 | 2.814910000  | -2.111209000 | 4.403891000  | 6 | -0.609402000 | -6.049688000 | -0.312632000 |
| 1 | 2.832500000  | -3.022179000 | 3.778557000  | 1 | 0.407660000  | -6.480055000 | -0.296595000 |
| 1 | 1.569947000  | -3.002764000 | 5.936459000  | 6 | -0.780658000 | -5.058655000 | 0.838263000  |
| 1 | 3.725652000  | -2.134324000 | 5.026723000  | 1 | -0.593466000 | -5.566343000 | 1.800189000  |
| 6 | 1.572982000  | -2.106876000 | 5.293246000  | 6 | 0.217668000  | -3.911310000 | 0.683079000  |
| 6 | 1.559243000  | -0.848454000 | 6.163185000  | 1 | 0.074830000  | -3.173967000 | 1.496124000  |
| 1 | 2.445413000  | -0.832910000 | 6.820566000  | 1 | 1.255596000  | -4.287633000 | 0.749678000  |
| 6 | 2.806178000  | 0.391048000  | 4.394727000  | 1 | -1.312146000 | -6.892276000 | -0.194285000 |
| 1 | 2.827722000  | 1.300142000  | 3.766397000  | 1 | 3.313079000  | 3.675724000  | 1.726294000  |
| 6 | 1.553203000  | 0.392522000  | 5.269740000  | 1 | 0.673925000  | -0.851733000 | 6.823571000  |
| 1 | 1.532050000  | 1.302662000  | 5.892871000  | 1 | -6.658077000 | 2.515747000  | 0.902777000  |
| 6 | 0.307945000  | 0.380548000  | 4.381792000  | 1 | -2.328052000 | -3.780745000 | 1.663614000  |
| 1 | -0.614464000 | 0.404417000  | 4.991259000  |   |              |              |              |

**TS2-L3**

|    |              |              |              |   |              |              |              |
|----|--------------|--------------|--------------|---|--------------|--------------|--------------|
| 7  | -2.930302000 | 1.371942000  | 1.023190000  | 6 | -3.984744000 | 3.749690000  | -1.672411000 |
| 29 | -0.901317000 | 1.080970000  | 0.748432000  | 6 | -5.439188000 | 3.964038000  | -1.253336000 |
| 6  | -3.267879000 | 1.216629000  | 2.243518000  | 1 | -6.021056000 | 4.373036000  | -2.097293000 |
| 7  | -1.001547000 | 0.816618000  | 2.745419000  | 6 | -5.987573000 | 1.631500000  | -1.955489000 |
| 6  | -2.209552000 | 0.799333000  | 3.172590000  | 1 | -6.442274000 | 0.671350000  | -1.651796000 |
| 1  | -4.285084000 | 1.388891000  | 2.626951000  | 6 | -6.044834000 | 2.633683000  | -0.801759000 |
| 1  | -2.485177000 | 0.504814000  | 4.194626000  | 1 | -7.092493000 | 2.787102000  | -0.492846000 |
| 6  | 0.054338000  | 1.298163000  | -0.825106000 | 6 | -5.251181000 | 2.093840000  | 0.393147000  |
| 6  | 0.551372000  | 2.219209000  | -1.674967000 | 1 | -5.302758000 | 2.814800000  | 1.231341000  |
| 6  | 1.124763000  | 3.485239000  | -1.201881000 | 1 | -5.689086000 | 1.139853000  | 0.748869000  |
| 6  | 0.784954000  | 4.019768000  | 0.052292000  | 1 | -6.578844000 | 2.007825000  | -2.808093000 |
| 6  | 2.060712000  | 4.164541000  | -1.995218000 | 6 | 0.140391000  | 0.429859000  | 3.563702000  |
| 6  | 1.380561000  | 5.188815000  | 0.507850000  | 6 | 1.071938000  | -0.442675000 | 2.704339000  |
| 6  | 2.648098000  | 5.337657000  | -1.535487000 | 1 | 0.521779000  | -1.332872000 | 2.342167000  |
| 6  | 2.317226000  | 5.851357000  | -0.283416000 | 1 | 1.376680000  | 0.133660000  | 1.804700000  |
| 1  | 0.016650000  | 3.523761000  | 0.660202000  | 1 | -0.889416000 | 0.312261000  | 5.475567000  |
| 1  | 2.315062000  | 3.753584000  | -2.976014000 | 6 | -0.243795000 | -0.320232000 | 4.839343000  |
| 1  | 1.098915000  | 5.599001000  | 1.481413000  | 1 | -0.827875000 | -1.224785000 | 4.568790000  |
| 1  | 3.373500000  | 5.860667000  | -2.164839000 | 1 | 2.943140000  | -1.488423000 | 2.880476000  |
| 1  | 2.779141000  | 6.776383000  | 0.071192000  | 6 | 2.309038000  | -0.837697000 | 3.508407000  |
| 7  | 2.417331000  | -1.308953000 | -0.565774000 | 6 | 1.899379000  | -1.591699000 | 4.771984000  |
| 29 | 0.382491000  | -0.566673000 | -0.767054000 | 1 | 1.359936000  | -2.519361000 | 4.505165000  |
| 6  | 2.370554000  | -2.580907000 | -0.459115000 | 1 | 0.708323000  | -1.229533000 | 6.545266000  |
| 7  | 0.029917000  | -2.470759000 | -0.147371000 | 1 | 2.795047000  | -1.896169000 | 5.340394000  |
| 6  | 1.084300000  | -3.199016000 | -0.145249000 | 6 | 1.009656000  | -0.695036000 | 5.628831000  |
| 1  | 3.256588000  | -3.232038000 | -0.545366000 | 6 | 1.759627000  | 0.585829000  | 6.001168000  |
| 1  | 1.068890000  | -4.261622000 | 0.141665000  | 1 | 2.657554000  | 0.339171000  | 6.593344000  |
| 7  | 0.667575000  | 1.968321000  | -3.044783000 | 6 | 3.067065000  | 0.437855000  | 3.882756000  |
| 7  | -0.384667000 | 0.076393000  | -2.595324000 | 1 | 3.380736000  | 0.979151000  | 2.970151000  |
| 7  | 0.194576000  | 0.876767000  | -3.446696000 | 6 | 2.162831000  | 1.334376000  | 4.729657000  |
| 6  | -0.136097000 | -2.245764000 | -3.479840000 | 1 | 2.700588000  | 2.259993000  | 4.995755000  |
| 6  | 1.253564000  | -2.130374000 | -3.466665000 | 6 | 0.911794000  | 1.709253000  | 3.931742000  |
| 6  | -0.702166000 | -3.495342000 | -3.757700000 | 1 | 0.254169000  | 2.373802000  | 4.521356000  |
| 6  | 2.057509000  | -3.252039000 | -3.665776000 | 1 | 1.175385000  | 2.245437000  | 2.998499000  |
| 6  | 0.095517000  | -4.615406000 | -3.952976000 | 1 | 3.985189000  | 0.189460000  | 4.443047000  |
| 1  | -1.792242000 | -3.589476000 | -3.817034000 | 6 | 3.695942000  | -0.627892000 | -0.788242000 |
| 6  | 1.483720000  | -4.499470000 | -3.890530000 | 6 | 4.492622000  | -1.200806000 | -1.970229000 |
| 1  | 3.147102000  | -3.149457000 | -3.659694000 | 1 | 4.706779000  | -2.274752000 | -1.814525000 |
| 1  | -0.365780000 | -5.584054000 | -4.164017000 | 1 | 3.890831000  | -1.107783000 | -2.892435000 |
| 1  | 2.116258000  | -5.377040000 | -4.048349000 | 1 | 3.952008000  | -0.337875000 | 1.330701000  |
| 6  | -1.036165000 | -1.060381000 | -3.219155000 | 6 | 4.540108000  | -0.747826000 | 0.490830000  |
| 1  | -1.875620000 | -1.366435000 | -2.563831000 | 1 | 4.733666000  | -1.816323000 | 0.707641000  |
| 1  | 1.711729000  | -1.148656000 | -3.297468000 | 1 | 6.364896000  | -0.853769000 | -2.978505000 |
| 6  | -3.799489000 | 1.871962000  | -0.020893000 | 6 | 5.805928000  | -0.428806000 | -2.127445000 |
| 6  | -3.741583000 | 0.873141000  | -1.188318000 | 6 | 6.633646000  | -0.561545000 | -0.848790000 |
| 1  | -2.678788000 | 0.714004000  | -1.460060000 | 1 | 6.877998000  | -1.622235000 | -0.658317000 |
| 1  | -4.161252000 | -0.095065000 | -0.848189000 | 1 | 6.439037000  | -0.082160000 | 1.256501000  |
| 1  | -3.205411000 | 3.922395000  | 0.361222000  | 1 | 7.594001000  | -0.030131000 | -0.964053000 |
| 6  | -3.188707000 | 3.210947000  | -0.485224000 | 6 | 5.850269000  | 0.019885000  | 0.328449000  |
| 1  | -2.130346000 | 3.048623000  | -0.766090000 | 6 | 5.540381000  | 1.494458000  | 0.068130000  |
| 1  | -4.484601000 | 0.687459000  | -3.201286000 | 1 | 6.479051000  | 2.068426000  | -0.020238000 |
| 6  | -4.533027000 | 1.417802000  | -2.375209000 | 6 | 5.502229000  | 1.046281000  | -2.392170000 |
| 6  | -3.913374000 | 2.742890000  | -2.821145000 | 1 | 4.921768000  | 1.155418000  | -3.325368000 |
| 1  | -2.860758000 | 2.586334000  | -3.122214000 | 6 | 4.717480000  | 1.623916000  | -1.213755000 |
| 1  | -3.538200000 | 4.707807000  | -1.987371000 | 1 | 4.482023000  | 2.685424000  | -1.400605000 |
| 1  | -4.447227000 | 3.134810000  | -3.703788000 | 6 | 3.412297000  | 0.847947000  | -1.054692000 |



|             |              |              |              |   |              |              |              |
|-------------|--------------|--------------|--------------|---|--------------|--------------|--------------|
| 1           | 2.807530000  | 1.251352000  | -0.215706000 | 7 | 0.163878000  | 1.691103000  | 1.858726000  |
| 1           | 2.795425000  | 0.929408000  | -1.972361000 | 6 | 1.058373000  | 1.798770000  | 2.772412000  |
| 1           | 6.444049000  | 1.604191000  | -2.534258000 | 1 | 3.121817000  | 1.247557000  | 3.342696000  |
| 1           | -1.495005000 | -0.719425000 | -4.165290000 | 1 | 0.945173000  | 2.461624000  | 3.646587000  |
| 6           | -1.243899000 | -3.004536000 | 0.362107000  | 7 | -0.151203000 | -3.879554000 | 0.241765000  |
| 6           | -1.926866000 | -3.891921000 | -0.684105000 | 7 | -0.944400000 | -2.186855000 | 1.242836000  |
| 1           | -2.063922000 | -3.306384000 | -1.606617000 | 7 | -0.878751000 | -3.520192000 | 1.244629000  |
| 1           | -1.267934000 | -4.745436000 | -0.935104000 | 6 | -0.533446000 | -1.329438000 | 3.528445000  |
| 1           | -1.637927000 | -1.195661000 | 1.426566000  | 6 | 0.774736000  | -1.806722000 | 3.474113000  |
| 6           | -2.143229000 | -1.806540000 | 0.655059000  | 6 | -0.952242000 | -0.624576000 | 4.662347000  |
| 1           | -2.222436000 | -1.188825000 | -0.261437000 | 6 | 1.660317000  | -1.544101000 | 4.519434000  |
| 1           | -3.755238000 | -5.004369000 | -0.923745000 | 6 | -0.064314000 | -0.343981000 | 5.693273000  |
| 6           | -3.285666000 | -4.360361000 | -0.161048000 | 1 | -1.994990000 | -0.300873000 | 4.743306000  |
| 6           | -4.170221000 | -3.138653000 | 0.096388000  | 6 | 1.253692000  | -0.794922000 | 5.618404000  |
| 1           | -4.313025000 | -2.567245000 | -0.840366000 | 1 | 2.680313000  | -1.940015000 | 4.482468000  |
| 1           | -4.142310000 | -1.355913000 | 1.330398000  | 1 | -0.406365000 | 0.209349000  | 6.572184000  |
| 1           | -5.171929000 | -3.457382000 | 0.432690000  | 1 | 1.950903000  | -0.592057000 | 6.435702000  |
| 6           | -3.513294000 | -2.249997000 | 1.152754000  | 6 | -1.509558000 | -1.537316000 | 2.394950000  |
| 6           | -3.320622000 | -3.026647000 | 2.455082000  | 1 | -1.893429000 | -0.551580000 | 2.073750000  |
| 1           | -4.293607000 | -3.342327000 | 2.869527000  | 1 | 1.101852000  | -2.394700000 | 2.609354000  |
| 6           | -3.109335000 | -5.143319000 | 1.139407000  | 6 | -3.856035000 | -1.382790000 | -1.462994000 |
| 1           | -2.495949000 | -6.044702000 | 0.964193000  | 6 | -4.178812000 | -1.042997000 | -0.000753000 |
| 6           | -2.441962000 | -4.249395000 | 2.185717000  | 1 | -3.228957000 | -1.063992000 | 0.560994000  |
| 1           | -2.296707000 | -4.816171000 | 3.120962000  | 1 | -4.578389000 | -0.010496000 | 0.051714000  |
| 6           | -1.072546000 | -3.810078000 | 1.661441000  | 1 | -2.982917000 | -3.033406000 | -2.563738000 |
| 1           | -0.549474000 | -3.188566000 | 2.414481000  | 6 | -3.246356000 | -2.795028000 | -1.517384000 |
| 1           | -0.451862000 | -4.706935000 | 1.489748000  | 1 | -2.311121000 | -2.809381000 | -0.931866000 |
| 1           | -4.089447000 | -5.492807000 | 1.507094000  | 1 | -5.389927000 | -1.791749000 | 1.616469000  |
| 1           | 4.982508000  | 1.922968000  | 0.921197000  | 6 | -5.169315000 | -2.056267000 | 0.567409000  |
| 1           | 1.124862000  | 1.226351000  | 6.638855000  | 6 | -4.547490000 | -3.452278000 | 0.501074000  |
| 1           | -5.496024000 | 4.707244000  | -0.438139000 | 1 | -3.613733000 | -3.491334000 | 1.093599000  |
| 1           | -2.842847000 | -2.373967000 | 3.213305000  | 1 | -3.787949000 | -4.809143000 | -1.004895000 |
| <b>P-L3</b> |              |              |              | 1 | -5.236617000 | -4.195284000 | 0.937900000  |
| 7           | -2.831131000 | -0.442067000 | -1.880208000 | 6 | -4.243800000 | -3.806302000 | -0.954974000 |
| 29          | -0.993327000 | -0.237599000 | -0.990465000 | 6 | -5.530230000 | -3.770131000 | -1.779330000 |
| 6           | -2.950107000 | 0.312000000  | -2.905191000 | 1 | -6.251332000 | -4.510772000 | -1.392676000 |
| 7           | -0.813600000 | 1.212957000  | -2.449515000 | 6 | -6.454980000 | -2.015313000 | -0.259398000 |
| 6           | -1.856614000 | 1.238050000  | -3.191729000 | 1 | -6.916521000 | -1.013183000 | -0.199922000 |
| 1           | -3.830026000 | 0.308153000  | -3.563662000 | 6 | -6.138212000 | -2.368445000 | -1.713503000 |
| 1           | -1.968289000 | 1.934132000  | -4.037075000 | 1 | -7.062729000 | -2.333406000 | -2.314018000 |
| 6           | -0.206512000 | -1.616181000 | 0.219622000  | 6 | -5.142043000 | -1.354411000 | -2.286035000 |
| 6           | 0.296725000  | -2.778141000 | -0.411443000 | 1 | -4.924311000 | -1.601821000 | -3.342366000 |
| 6           | 1.203057000  | -2.919879000 | -1.548416000 | 1 | -5.581032000 | -0.338011000 | -2.266951000 |
| 6           | 1.539497000  | -1.842569000 | -2.382120000 | 1 | -7.190952000 | -2.729635000 | 0.148066000  |
| 6           | 1.785021000  | -4.170768000 | -1.814260000 | 6 | 0.288683000  | 2.147616000  | -2.716200000 |
| 6           | 2.439848000  | -2.000841000 | -3.430518000 | 6 | 1.270578000  | 2.114460000  | -1.544362000 |
| 6           | 2.669274000  | -4.330149000 | -2.874342000 | 1 | 0.747044000  | 2.418763000  | -0.617116000 |
| 6           | 3.006908000  | -3.247834000 | -3.685261000 | 1 | 1.618447000  | 1.072987000  | -1.405746000 |
| 1           | 1.073823000  | -0.864060000 | -2.209731000 | 1 | -0.916115000 | 3.676368000  | -3.721724000 |
| 1           | 1.521809000  | -5.015503000 | -1.172339000 | 6 | -0.193013000 | 3.596324000  | -2.891572000 |
| 1           | 2.692149000  | -1.148022000 | -4.069500000 | 1 | -0.716455000 | 3.909540000  | -1.965369000 |
| 1           | 3.104881000  | -5.313883000 | -3.069536000 | 1 | 3.148073000  | 2.985124000  | -0.944972000 |
| 1           | 3.703910000  | -3.376971000 | -4.517146000 | 6 | 2.463985000  | 3.028720000  | -1.809654000 |
| 7           | 2.459097000  | 0.331134000  | 1.573776000  | 6 | 1.971777000  | 4.462799000  | -1.995479000 |
| 29          | 0.665862000  | 0.077766000  | 0.682214000  | 1 | 1.472121000  | 4.813966000  | -1.073334000 |
| 6           | 2.324487000  | 1.080430000  | 2.604520000  | 1 | 0.632576000  | 5.541795000  | -3.313295000 |

|   |              |              |              |              |              |              |              |
|---|--------------|--------------|--------------|--------------|--------------|--------------|--------------|
| 1 | 2.823772000  | 5.141113000  | -2.174743000 | 1            | -1.537470000 | 5.958493000  | 1.604248000  |
| 6 | 1.001606000  | 4.511713000  | -3.172751000 | 6            | -0.620706000 | 4.012743000  | 1.724152000  |
| 6 | 1.718290000  | 4.043896000  | -4.441283000 | 1            | -0.048391000 | 4.119233000  | 0.780302000  |
| 1 | 2.567591000  | 4.713743000  | -4.659821000 | 1            | 0.055111000  | 4.302382000  | 2.549963000  |
| 6 | 3.177875000  | 2.540530000  | -3.069970000 | 1            | -3.509716000 | 5.397842000  | 3.032823000  |
| 1 | 3.526938000  | 1.498694000  | -2.921500000 | 1            | 4.167062000  | -2.564156000 | -1.221235000 |
| 6 | 2.213381000  | 2.608227000  | -4.256144000 | 1            | 1.037819000  | 4.101292000  | -5.309398000 |
| 1 | 2.724621000  | 2.269127000  | -5.173100000 | 1            | -5.320685000 | -4.047231000 | -2.827786000 |
| 6 | 1.015498000  | 1.697481000  | -3.994067000 | 1            | -2.221359000 | 4.668432000  | -0.419157000 |
| 1 | 0.307167000  | 1.730332000  | -4.843504000 | <b>Ac-L4</b> |              |              |              |
| 1 | 1.331075000  | 0.644728000  | -3.878542000 | 29           | -1.369769000 | 0.540414000  | -0.052024000 |
| 1 | 4.071924000  | 3.155268000  | -3.271626000 | 6            | -2.096672000 | 3.409741000  | -0.020426000 |
| 6 | 3.706702000  | -0.337522000 | 1.222672000  | 6            | -1.291016000 | 2.464179000  | -0.014059000 |
| 6 | 4.909051000  | 0.082534000  | 2.066006000  | 15           | -1.662698000 | -1.646451000 | -0.043869000 |
| 1 | 5.042961000  | 1.180313000  | 2.012335000  | 6            | -1.671373000 | -2.272274000 | 1.664950000  |
| 1 | 4.733056000  | -0.177595000 | 3.128154000  | 6            | -1.234337000 | -3.554644000 | 2.014818000  |
| 1 | 3.089889000  | -0.360828000 | -0.836617000 | 6            | -2.201086000 | -1.428951000 | 2.651273000  |
| 6 | 3.968400000  | -0.017401000 | -0.256816000 | 6            | -1.321062000 | -3.980153000 | 3.337803000  |
| 1 | 4.057393000  | 1.077897000  | -0.380921000 | 1            | -0.818764000 | -4.223545000 | 1.253066000  |
| 1 | 7.025306000  | -0.311966000 | 2.180866000  | 6            | -2.303800000 | -1.865967000 | 3.967637000  |
| 6 | 6.167345000  | -0.634873000 | 1.567304000  | 1            | -2.544373000 | -0.422192000 | 2.378421000  |
| 6 | 6.419207000  | -0.279722000 | 0.100679000  | 6            | -1.857216000 | -3.140769000 | 4.312106000  |
| 1 | 6.577148000  | 0.808536000  | -0.007058000 | 1            | -0.977466000 | -4.982435000 | 3.607730000  |
| 1 | 5.392668000  | -0.469506000 | -1.804694000 | 1            | -2.729036000 | -1.207599000 | 4.729725000  |
| 1 | 7.342464000  | -0.771809000 | -0.250886000 | 1            | -1.931103000 | -3.483872000 | 5.347644000  |
| 6 | 5.226904000  | -0.729917000 | -0.743888000 | 6            | -0.438392000 | -2.640372000 | -0.945118000 |
| 6 | 5.025238000  | -2.238518000 | -0.606876000 | 6            | -0.701807000 | -3.140997000 | -2.225764000 |
| 1 | 5.914196000  | -2.777806000 | -0.977342000 | 6            | 0.830561000  | -2.827101000 | -0.378264000 |
| 6 | 5.971918000  | -2.145365000 | 1.704736000  | 6            | 0.291209000  | -3.827752000 | -2.919997000 |
| 1 | 5.813329000  | -2.414245000 | 2.764654000  | 1            | -1.688737000 | -3.004026000 | -2.679992000 |
| 6 | 4.775146000  | -2.580984000 | 0.859897000  | 6            | 1.822561000  | -3.496177000 | -1.085322000 |
| 1 | 4.613899000  | -3.667206000 | 0.966694000  | 1            | 1.029795000  | -2.471055000 | 0.637428000  |
| 6 | 3.517944000  | -1.859493000 | 1.346051000  | 6            | 1.552456000  | -4.000462000 | -2.356273000 |
| 1 | 2.634007000  | -2.162264000 | 0.752962000  | 1            | 0.074385000  | -4.231604000 | -3.912717000 |
| 1 | 3.323976000  | -2.113274000 | 2.401608000  | 1            | 2.809187000  | -3.635739000 | -0.631324000 |
| 1 | 6.882030000  | -2.675549000 | 1.375053000  | 1            | 2.329761000  | -4.535386000 | -2.909078000 |
| 1 | -2.375077000 | -2.138615000 | 2.726570000  | 6            | -3.273090000 | -2.121260000 | -0.729353000 |
| 6 | -1.035977000 | 2.538689000  | 1.886700000  | 6            | -4.100963000 | -1.154832000 | -1.308476000 |
| 6 | -1.834651000 | 2.371122000  | 3.185163000  | 6            | -3.693953000 | -3.456791000 | -0.671586000 |
| 1 | -2.143714000 | 1.315240000  | 3.268485000  | 6            | -5.339418000 | -1.520569000 | -1.830315000 |
| 1 | -1.201785000 | 2.594496000  | 4.063849000  | 1            | -3.772153000 | -0.108734000 | -1.346937000 |
| 1 | -1.372027000 | 2.293764000  | -0.230217000 | 6            | -4.929116000 | -3.816548000 | -1.193716000 |
| 6 | -1.944269000 | 2.176047000  | 0.709596000  | 1            | -3.046177000 | -4.214825000 | -0.213746000 |
| 1 | -2.240290000 | 1.109776000  | 0.785813000  | 6            | -5.750863000 | -2.848189000 | -1.772227000 |
| 1 | -3.618783000 | 3.145772000  | 4.111663000  | 1            | -5.985836000 | -0.763777000 | -2.281757000 |
| 6 | -3.067057000 | 3.276059000  | 3.165213000  | 1            | -5.258398000 | -4.857814000 | -1.148025000 |
| 6 | -3.961506000 | 2.881997000  | 1.988855000  | 1            | -6.724237000 | -3.134991000 | -2.179143000 |
| 1 | -4.286871000 | 1.830051000  | 2.094880000  | 6            | -3.013179000 | 4.486480000  | -0.030850000 |
| 1 | -3.819130000 | 2.766173000  | -0.173591000 | 6            | -3.414841000 | 5.068052000  | -1.249705000 |
| 1 | -4.875532000 | 3.500535000  | 1.980670000  | 6            | -3.534201000 | 4.991319000  | 1.176979000  |
| 6 | -3.187429000 | 3.062941000  | 0.683581000  | 6            | -4.313014000 | 6.124170000  | -1.253990000 |
| 6 | -2.759179000 | 4.523035000  | 0.535500000  | 1            | -3.007353000 | 4.676627000  | -2.185221000 |
| 1 | -3.645284000 | 5.180374000  | 0.504423000  | 6            | -4.432281000 | 6.047350000  | 1.159667000  |
| 6 | -2.628640000 | 4.733525000  | 3.020431000  | 1            | -3.219503000 | 4.540255000  | 2.121356000  |
| 1 | -1.996831000 | 5.028384000  | 3.877034000  | 6            | -4.822654000 | 6.614617000  | -0.052557000 |
| 6 | -1.859954000 | 4.908708000  | 1.710186000  | 1            | -4.620084000 | 6.572423000  | -2.202234000 |

|              |              |              |              |    |              |              |              |
|--------------|--------------|--------------|--------------|----|--------------|--------------|--------------|
| 1            | -4.832777000 | 6.435490000  | 2.099529000  | 1  | -1.934157000 | 1.077437000  | -3.873305000 |
| 1            | -5.530156000 | 7.448000000  | -0.060940000 | 1  | -2.843026000 | 0.781891000  | -2.385108000 |
| 29           | 0.563757000  | 2.027987000  | 0.028367000  | 15 | 2.608891000  | 0.648521000  | 0.615525000  |
| 15           | 2.494290000  | 0.962945000  | 0.035609000  | 6  | 2.112988000  | 1.282568000  | 2.240139000  |
| 6            | 2.432458000  | -0.325529000 | 1.318509000  | 6  | 0.777990000  | 1.115996000  | 2.632718000  |
| 6            | 2.696009000  | 0.079450000  | -1.543834000 | 6  | 3.012759000  | 1.910703000  | 3.113171000  |
| 6            | 3.936397000  | -0.424778000 | -1.957236000 | 6  | 0.345760000  | 1.584843000  | 3.869434000  |
| 1            | 4.830962000  | -0.251657000 | -1.347819000 | 1  | 0.077111000  | 0.598706000  | 1.959595000  |
| 6            | 4.043023000  | -1.113773000 | -3.161243000 | 6  | 2.575086000  | 2.382353000  | 4.345670000  |
| 1            | 5.015042000  | -1.498051000 | -3.481617000 | 1  | 4.068579000  | 2.007372000  | 2.833979000  |
| 6            | 2.921259000  | -1.291135000 | -3.967990000 | 6  | 1.243005000  | 2.221201000  | 4.723274000  |
| 1            | 3.013779000  | -1.817021000 | -4.922411000 | 1  | -0.692044000 | 1.432592000  | 4.181570000  |
| 6            | 1.685729000  | -0.790775000 | -3.566371000 | 1  | 3.280937000  | 2.869637000  | 5.023286000  |
| 1            | 0.804626000  | -0.925138000 | -4.199687000 | 1  | 0.906322000  | 2.581773000  | 5.698920000  |
| 6            | 1.571791000  | -0.112899000 | -2.358007000 | 6  | 2.897949000  | 2.064135000  | -0.486234000 |
| 1            | 0.595616000  | 0.282511000  | -2.043518000 | 6  | 2.546713000  | 1.924875000  | -1.834728000 |
| 6            | 4.599216000  | 2.586322000  | -0.762694000 | 6  | 3.421079000  | 3.278490000  | -0.031684000 |
| 6            | 4.070400000  | 1.826130000  | 0.290966000  | 6  | 2.719455000  | 2.983549000  | -2.719116000 |
| 1            | 4.090587000  | 2.605846000  | -1.733556000 | 1  | 2.118209000  | 0.976840000  | -2.183907000 |
| 1            | 6.184923000  | 3.890435000  | -1.408080000 | 6  | 3.586209000  | 4.338268000  | -0.918251000 |
| 6            | 5.773878000  | 3.304988000  | -0.581635000 | 1  | 3.690560000  | 3.408541000  | 1.020810000  |
| 6            | 6.425763000  | 3.279189000  | 0.650432000  | 6  | 3.235821000  | 4.192500000  | -2.258659000 |
| 1            | 7.350055000  | 3.845657000  | 0.790674000  | 1  | 2.440688000  | 2.867643000  | -3.769913000 |
| 6            | 5.900276000  | 2.534418000  | 1.701417000  | 1  | 3.993344000  | 5.287047000  | -0.558734000 |
| 1            | 6.409777000  | 2.514510000  | 2.668241000  | 1  | 3.365064000  | 5.029866000  | -2.949774000 |
| 6            | 4.724381000  | 1.808986000  | 1.527816000  | 6  | 4.234547000  | -0.141577000 | 0.845309000  |
| 1            | 4.316602000  | 1.226999000  | 2.360524000  | 6  | 5.098095000  | -0.238183000 | -0.253827000 |
| 6            | 1.370067000  | -0.357965000 | 2.229756000  | 6  | 4.581243000  | -0.757553000 | 2.054170000  |
| 1            | 0.595789000  | 0.421720000  | 2.199861000  | 6  | 6.310276000  | -0.907830000 | -0.129679000 |
| 6            | 3.417075000  | -1.322221000 | 1.370519000  | 1  | 4.826447000  | 0.226645000  | -1.208575000 |
| 1            | 4.259707000  | -1.296642000 | 0.669471000  | 6  | 5.800005000  | -1.420295000 | 2.171086000  |
| 6            | 3.323512000  | -2.347403000 | 2.304090000  | 1  | 3.903299000  | -0.710394000 | 2.913036000  |
| 1            | 4.091723000  | -3.124770000 | 2.338964000  | 6  | 6.668054000  | -1.488446000 | 1.084981000  |
| 6            | 2.253075000  | -2.380934000 | 3.200341000  | 1  | 6.984264000  | -0.969890000 | -0.988331000 |
| 1            | 2.180068000  | -3.189246000 | 3.933449000  | 1  | 6.074958000  | -1.881193000 | 3.123729000  |
| 6            | 1.285397000  | -1.381925000 | 3.171674000  | 1  | 7.628362000  | -2.001963000 | 1.183927000  |
| 1            | 0.451261000  | -1.404874000 | 3.879181000  | 6  | 2.724799000  | -3.296460000 | -1.028262000 |
| <b>RC-L4</b> |              |              |              | 6  | 3.340735000  | -3.282481000 | -2.292284000 |
| 29           | 1.229966000  | -0.866532000 | -0.146960000 | 6  | 3.465104000  | -3.707849000 | 0.096439000  |
| 6            | 1.379413000  | -2.843199000 | -0.871089000 | 6  | 4.660734000  | -3.692087000 | -2.425250000 |
| 6            | 0.196783000  | -2.462557000 | -0.715411000 | 1  | 2.764451000  | -2.952124000 | -3.161053000 |
| 7            | 0.906242000  | -0.910630000 | -3.510513000 | 6  | 4.782184000  | -4.115510000 | -0.050206000 |
| 7            | -1.153121000 | -0.355783000 | -2.514532000 | 1  | 2.984153000  | -3.705325000 | 1.079341000  |
| 7            | -0.082866000 | -0.559769000 | -3.096978000 | 6  | 5.380966000  | -4.113040000 | -1.309328000 |
| 6            | -1.152250000 | 2.106556000  | -2.143253000 | 1  | 5.131475000  | -3.689245000 | -3.411774000 |
| 6            | -0.655611000 | 2.036704000  | -0.838421000 | 1  | 5.350190000  | -4.438601000 | 0.826517000  |
| 6            | -1.092010000 | 3.323701000  | -2.825143000 | 1  | 6.417994000  | -4.441372000 | -1.421283000 |
| 6            | -0.123057000 | 3.164181000  | -0.223244000 | 29 | -1.389467000 | -1.446201000 | -0.629265000 |
| 1            | -0.710796000 | 1.087363000  | -0.284859000 | 15 | -3.301471000 | -0.722764000 | 0.250529000  |
| 6            | -0.554785000 | 4.452313000  | -2.211562000 | 6  | -4.692360000 | -0.982983000 | -0.893446000 |
| 1            | -1.477728000 | 3.388836000  | -3.848162000 | 6  | -3.748122000 | -1.585887000 | 1.787758000  |
| 6            | -0.070731000 | 4.375347000  | -0.908579000 | 6  | -4.665697000 | -1.047087000 | 2.700351000  |
| 1            | 0.252903000  | 3.098157000  | 0.804543000  | 1  | -5.086655000 | -0.048640000 | 2.534483000  |
| 1            | -0.511584000 | 5.398171000  | -2.758354000 | 6  | -5.028608000 | -1.770936000 | 3.830216000  |
| 1            | 0.354236000  | 5.260208000  | -0.426356000 | 1  | -5.743601000 | -1.347556000 | 4.540539000  |
| 6            | -1.823145000 | 0.921105000  | -2.786525000 | 6  | -4.481519000 | -3.032655000 | 4.057888000  |

|               |              |              |              |    |              |              |              |
|---------------|--------------|--------------|--------------|----|--------------|--------------|--------------|
| 1             | -4.769808000 | -3.598620000 | 4.947762000  | 1  | -0.712870000 | 2.234357000  | 3.953024000  |
| 6             | -3.562900000 | -3.569235000 | 3.160330000  | 1  | 3.346613000  | 3.470814000  | 4.698839000  |
| 1             | -3.126720000 | -4.554521000 | 3.343651000  | 1  | 0.944273000  | 3.470599000  | 5.334491000  |
| 6             | -3.191855000 | -2.847546000 | 2.029860000  | 6  | 2.900423000  | 1.903496000  | -0.666194000 |
| 1             | -2.457807000 | -3.258669000 | 1.325914000  | 6  | 2.560646000  | 1.560196000  | -1.980928000 |
| 6             | -2.704243000 | 1.474785000  | 1.841369000  | 6  | 3.440941000  | 3.164260000  | -0.395835000 |
| 6             | -3.376270000 | 1.045145000  | 0.686324000  | 6  | 2.761459000  | 2.468004000  | -3.014495000 |
| 1             | -2.274168000 | 0.728927000  | 2.523221000  | 1  | 2.121208000  | 0.575866000  | -2.190617000 |
| 1             | -2.081359000 | 3.157200000  | 3.037581000  | 6  | 3.635844000  | 4.070984000  | -1.433124000 |
| 6             | -2.600574000 | 2.829581000  | 2.131707000  | 1  | 3.699478000  | 3.449052000  | 0.629064000  |
| 6             | -3.157169000 | 3.773779000  | 1.268894000  | 6  | 3.295779000  | 3.724675000  | -2.738942000 |
| 1             | -3.068309000 | 4.839856000  | 1.493789000  | 1  | 2.488128000  | 2.196584000  | -4.037663000 |
| 6             | -3.834904000 | 3.356738000  | 0.128384000  | 1  | 4.055784000  | 5.057422000  | -1.219407000 |
| 1             | -4.285709000 | 4.093346000  | -0.542032000 | 1  | 3.445844000  | 4.443181000  | -3.549383000 |
| 6             | -3.952129000 | 1.998439000  | -0.160476000 | 6  | 4.180524000  | -0.109438000 | 0.990408000  |
| 1             | -4.499587000 | 1.681133000  | -1.055256000 | 6  | 5.112448000  | -0.279285000 | -0.040925000 |
| 6             | -4.452500000 | -1.570611000 | -2.140714000 | 6  | 4.429934000  | -0.667536000 | 2.251133000  |
| 1             | -3.429279000 | -1.853239000 | -2.420563000 | 6  | 6.295328000  | -0.971103000 | 0.200347000  |
| 6             | -6.000209000 | -0.628633000 | -0.536212000 | 1  | 4.918732000  | 0.142483000  | -1.033445000 |
| 1             | -6.195454000 | -0.166166000 | 0.438381000  | 6  | 5.618502000  | -1.351787000 | 2.484583000  |
| 6             | -7.048851000 | -0.858236000 | -1.417677000 | 1  | 3.698298000  | -0.552513000 | 3.059010000  |
| 1             | -8.068032000 | -0.581494000 | -1.135636000 | 6  | 6.554072000  | -1.498663000 | 1.462757000  |
| 6             | -6.802464000 | -1.445858000 | -2.658858000 | 1  | 7.024648000  | -1.091183000 | -0.605318000 |
| 1             | -7.631386000 | -1.629730000 | -3.347610000 | 1  | 5.818351000  | -1.767321000 | 3.476008000  |
| 6             | -5.507158000 | -1.800950000 | -3.021067000 | 1  | 7.491092000  | -2.029337000 | 1.652454000  |
| 1             | -5.315673000 | -2.265299000 | -3.991825000 | 6  | 2.612195000  | -3.194146000 | -1.090882000 |
| <b>TS1-L4</b> |              |              |              | 6  | 3.399863000  | -3.352687000 | -2.238599000 |
| 29            | 1.140733000  | -0.851822000 | 0.054759000  | 6  | 3.154328000  | -3.520656000 | 0.169257000  |
| 6             | 1.263446000  | -2.664653000 | -1.108878000 | 6  | 4.698691000  | -3.836386000 | -2.121849000 |
| 6             | 0.164320000  | -2.498784000 | -0.446736000 | 1  | 2.987272000  | -3.109081000 | -3.218228000 |
| 7             | 1.046761000  | -1.795101000 | -2.785465000 | 6  | 4.448461000  | -4.001214000 | 0.272544000  |
| 7             | -0.930961000 | -0.740909000 | -2.273061000 | 1  | 2.534449000  | -3.383623000 | 1.062757000  |
| 7             | 0.114948000  | -1.084623000 | -2.917461000 | 6  | 5.225100000  | -4.161812000 | -0.875347000 |
| 6             | -1.044639000 | 1.734140000  | -2.372839000 | 1  | 5.304929000  | -3.968801000 | -3.021713000 |
| 6             | -0.603578000 | 1.926764000  | -1.060817000 | 1  | 4.858297000  | -4.249912000 | 1.255256000  |
| 6             | -0.979432000 | 2.806130000  | -3.264933000 | 1  | 6.246375000  | -4.544493000 | -0.795653000 |
| 6             | -0.109338000 | 3.158503000  | -0.647211000 | 29 | -1.369745000 | -1.469795000 | -0.475332000 |
| 1             | -0.665979000 | 1.098193000  | -0.341031000 | 15 | -3.291352000 | -0.645915000 | 0.327943000  |
| 6             | -0.484373000 | 4.041648000  | -2.854736000 | 6  | -4.673812000 | -1.084454000 | -0.768632000 |
| 1             | -1.321962000 | 2.669577000  | -4.296292000 | 6  | -3.716382000 | -1.291728000 | 1.972757000  |
| 6             | -0.045517000 | 4.220763000  | -1.545390000 | 6  | -4.632936000 | -0.643711000 | 2.812611000  |
| 1             | 0.229218000  | 3.290775000  | 0.387703000  | 1  | -5.069336000 | 0.316796000  | 2.515083000  |
| 1             | -0.434708000 | 4.869484000  | -3.567484000 | 6  | -4.974528000 | -1.209438000 | 4.035795000  |
| 1             | 0.351032000  | 5.188350000  | -1.225184000 | 1  | -5.688291000 | -0.700602000 | 4.688958000  |
| 6             | -1.637412000 | 0.417055000  | -2.812085000 | 6  | -4.408155000 | -2.420750000 | 4.429114000  |
| 1             | -1.680189000 | 0.364381000  | -3.912480000 | 1  | -4.679882000 | -2.861558000 | 5.391989000  |
| 1             | -2.680364000 | 0.329688000  | -2.453887000 | 6  | -3.492158000 | -3.065587000 | 3.603008000  |
| 15            | 2.582341000  | 0.688352000  | 0.642473000  | 1  | -3.042176000 | -4.011659000 | 3.914535000  |
| 6             | 2.109071000  | 1.580927000  | 2.145982000  | 6  | -3.142349000 | -2.501934000 | 2.379898000  |
| 6             | 0.757637000  | 1.576732000  | 2.516726000  | 1  | -2.411452000 | -3.000250000 | 1.731161000  |
| 6             | 3.040194000  | 2.261126000  | 2.942759000  | 6  | -2.757145000 | 1.777390000  | 1.593244000  |
| 6             | 0.340060000  | 2.257366000  | 3.655704000  | 6  | -3.379094000 | 1.164251000  | 0.494300000  |
| 1             | 0.031141000  | 1.019864000  | 1.906315000  | 1  | -2.354157000 | 1.156144000  | 2.404281000  |
| 6             | 2.617585000  | 2.942609000  | 4.078890000  | 1  | -2.192177000 | 3.636838000  | 2.528494000  |
| 1             | 4.104471000  | 2.239154000  | 2.679680000  | 6  | -2.668540000 | 3.162460000  | 1.665177000  |
| 6             | 1.269675000  | 2.942829000  | 4.434067000  | 6  | -3.187821000 | 3.950854000  | 0.638493000  |

|              |              |              |              |    |              |              |              |
|--------------|--------------|--------------|--------------|----|--------------|--------------|--------------|
| 1            | -3.110028000 | 5.039873000  | 0.692914000  | 1  | 3.042789000  | 1.134853000  | -4.210422000 |
| 6            | -3.812278000 | 3.351219000  | -0.449903000 | 1  | 5.053717000  | 4.200998000  | -1.942097000 |
| 1            | -4.230622000 | 3.966819000  | -1.250603000 | 1  | 4.474638000  | 3.174255000  | -4.130463000 |
| 6            | -3.915138000 | 1.963834000  | -0.521319000 | 6  | 3.939587000  | -0.440745000 | 1.084770000  |
| 1            | -4.416859000 | 1.500869000  | -1.378764000 | 6  | 4.822034000  | -0.920505000 | 0.109702000  |
| 6            | -4.424070000 | -1.819757000 | -1.932830000 | 6  | 4.014820000  | -0.937375000 | 2.393474000  |
| 1            | -3.395943000 | -2.115315000 | -2.180745000 | 6  | 5.789321000  | -1.860631000 | 0.453185000  |
| 6            | -5.986459000 | -0.707977000 | -0.455008000 | 1  | 4.766201000  | -0.549752000 | -0.919132000 |
| 1            | -6.188432000 | -0.129421000 | 0.453955000  | 6  | 4.989528000  | -1.870622000 | 2.728963000  |
| 6            | -7.031622000 | -1.063703000 | -1.297579000 | 1  | 3.319777000  | -0.573931000 | 3.159534000  |
| 1            | -8.054944000 | -0.769655000 | -1.050362000 | 6  | 5.882003000  | -2.327190000 | 1.761321000  |
| 6            | -6.775975000 | -1.798356000 | -2.455806000 | 1  | 6.481510000  | -2.225625000 | -0.310609000 |
| 1            | -7.601959000 | -2.079872000 | -3.114399000 | 1  | 5.057300000  | -2.238099000 | 3.756490000  |
| 6            | -5.475357000 | -2.175244000 | -2.774401000 | 1  | 6.652246000  | -3.055871000 | 2.028891000  |
| 1            | -5.276506000 | -2.752321000 | -3.681015000 | 6  | 2.165910000  | -3.373160000 | -0.919524000 |
| <b>IC-L4</b> |              |              |              | 6  | 3.026009000  | -3.775101000 | -1.947345000 |
| 29           | 0.837525000  | -0.508590000 | 0.226479000  | 6  | 2.443126000  | -3.749316000 | 0.404925000  |
| 6            | 0.983097000  | -2.547507000 | -1.208070000 | 6  | 4.137825000  | -4.556945000 | -1.650921000 |
| 6            | 0.046057000  | -2.172093000 | -0.303206000 | 1  | 2.804282000  | -3.480434000 | -2.975322000 |
| 7            | 0.875857000  | -2.125288000 | -2.552451000 | 6  | 3.547813000  | -4.535167000 | 0.690136000  |
| 7            | -0.859602000 | -0.768297000 | -2.112726000 | 1  | 1.773745000  | -3.420031000 | 1.208669000  |
| 7            | 0.033592000  | -1.264535000 | -2.896185000 | 6  | 4.396394000  | -4.945041000 | -0.339395000 |
| 6            | -0.688524000 | 1.664028000  | -2.445297000 | 1  | 4.802512000  | -4.878086000 | -2.457282000 |
| 6            | -0.428284000 | 2.107309000  | -1.143247000 | 1  | 3.755079000  | -4.829030000 | 1.722703000  |
| 6            | -0.172898000 | 2.388481000  | -3.519552000 | 1  | 5.265468000  | -5.569871000 | -0.114915000 |
| 6            | 0.320993000  | 3.257850000  | -0.920929000 | 29 | -1.547186000 | -1.298490000 | -0.343245000 |
| 1            | -0.847425000 | 1.553713000  | -0.289777000 | 15 | -3.493533000 | -0.447745000 | 0.349698000  |
| 6            | 0.580184000  | 3.540380000  | -3.299014000 | 6  | -4.837097000 | -0.692764000 | -0.844181000 |
| 1            | -0.369736000 | 2.047753000  | -4.541376000 | 6  | -4.074955000 | -1.094953000 | 1.941379000  |
| 6            | 0.829544000  | 3.976331000  | -2.001749000 | 6  | -4.934030000 | -0.358214000 | 2.768032000  |
| 1            | 0.506295000  | 3.602861000  | 0.102994000  | 1  | -5.224243000 | 0.662056000  | 2.491279000  |
| 1            | 0.979320000  | 4.099361000  | -4.150144000 | 6  | -5.403855000 | -0.915636000 | 3.951744000  |
| 1            | 1.421938000  | 4.879460000  | -1.829798000 | 1  | -6.072377000 | -0.338931000 | 4.596211000  |
| 6            | -1.508482000 | 0.421642000  | -2.679684000 | 6  | -5.021988000 | -2.205246000 | 4.317231000  |
| 1            | -1.668786000 | 0.264069000  | -3.758566000 | 1  | -5.393435000 | -2.639171000 | 5.249393000  |
| 1            | -2.499592000 | 0.517037000  | -2.201665000 | 6  | -4.162159000 | -2.938709000 | 3.504156000  |
| 15           | 2.607671000  | 0.730256000  | 0.659161000  | 1  | -3.856076000 | -3.946499000 | 3.795968000  |
| 6            | 2.548359000  | 1.917345000  | 2.023111000  | 6  | -3.685127000 | -2.384979000 | 2.320631000  |
| 6            | 1.304023000  | 2.383732000  | 2.465589000  | 1  | -2.998114000 | -2.954198000 | 1.682564000  |
| 6            | 3.719303000  | 2.368375000  | 2.648474000  | 6  | -2.636169000 | 1.813972000  | 1.696440000  |
| 6            | 1.234663000  | 3.305615000  | 3.505462000  | 6  | -3.359131000 | 1.348699000  | 0.586752000  |
| 1            | 0.385516000  | 2.009894000  | 1.989389000  | 1  | -2.298480000 | 1.105198000  | 2.464082000  |
| 6            | 3.643353000  | 3.290115000  | 3.686389000  | 1  | -1.804799000 | 3.530219000  | 2.698874000  |
| 1            | 4.693411000  | 1.981913000  | 2.325668000  | 6  | -2.352854000 | 3.169081000  | 1.823684000  |
| 6            | 2.402535000  | 3.760229000  | 4.112486000  | 6  | -2.778478000 | 4.070053000  | 0.847452000  |
| 1            | 0.264144000  | 3.664214000  | 3.858700000  | 1  | -2.551283000 | 5.134441000  | 0.948801000  |
| 1            | 4.558083000  | 3.639990000  | 4.171814000  | 6  | -3.498776000 | 3.613616000  | -0.251328000 |
| 1            | 2.345279000  | 4.479269000  | 4.933965000  | 1  | -3.837878000 | 4.317616000  | -1.015469000 |
| 6            | 3.183474000  | 1.581777000  | -0.835099000 | 6  | -3.790531000 | 2.257566000  | -0.384907000 |
| 6            | 2.839157000  | 1.018601000  | -2.070990000 | 1  | -4.354093000 | 1.905310000  | -1.256470000 |
| 6            | 3.978484000  | 2.730863000  | -0.791894000 | 6  | -4.585179000 | -1.389398000 | -2.031256000 |
| 6            | 3.312052000  | 1.583243000  | -3.250276000 | 1  | -3.576891000 | -1.774522000 | -2.233294000 |
| 1            | 2.197513000  | 0.126722000  | -2.112605000 | 6  | -6.125262000 | -0.206882000 | -0.583283000 |
| 6            | 4.433868000  | 3.301094000  | -1.977261000 | 1  | -6.328049000 | 0.338032000  | 0.346374000  |
| 1            | 4.238737000  | 3.189467000  | 0.167411000  | 6  | -7.144555000 | -0.415036000 | -1.503486000 |
| 6            | 4.108376000  | 2.725274000  | -3.203166000 | 1  | -8.149343000 | -0.036721000 | -1.298582000 |

|               |              |              |              |             |              |              |              |
|---------------|--------------|--------------|--------------|-------------|--------------|--------------|--------------|
| 6             | -6.887026000 | -1.110701000 | -2.685134000 | 1           | -6.199642000 | 2.708357000  | 0.011046000  |
| 1             | -7.693289000 | -1.276357000 | -3.404687000 | 1           | -4.439313000 | 2.490894000  | 3.938308000  |
| 6             | -5.610650000 | -1.596796000 | -2.950197000 | 1           | -6.066963000 | 3.519233000  | 2.359247000  |
| 1             | -5.411722000 | -2.144419000 | -3.874825000 | 6           | -1.948687000 | 3.470312000  | -0.899839000 |
| <b>TS2-L4</b> |              |              |              | 6           | -2.824363000 | 3.978402000  | -1.866938000 |
| 29            | -0.721955000 | 0.271847000  | 0.165604000  | 6           | -2.091242000 | 3.863992000  | 0.440423000  |
| 6             | -0.893753000 | 2.519896000  | -1.278118000 | 6           | -3.817554000 | 4.877964000  | -1.494491000 |
| 6             | -0.032131000 | 1.956559000  | -0.386778000 | 1           | -2.706640000 | 3.669091000  | -2.907815000 |
| 7             | -0.839286000 | 2.169613000  | -2.626082000 | 6           | -3.075690000 | 4.770504000  | 0.800119000  |
| 7             | 0.715907000  | 0.681695000  | -2.084207000 | 1           | -1.410722000 | 3.456345000  | 1.197069000  |
| 7             | -0.063428000 | 1.228682000  | -2.953610000 | 6           | -3.940381000 | 5.282475000  | -0.167966000 |
| 6             | 0.406295000  | -1.750154000 | -2.349699000 | 1           | -4.494966000 | 5.278985000  | -2.253119000 |
| 6             | 0.254900000  | -2.302932000 | -1.071530000 | 1           | -3.175707000 | 5.079202000  | 1.844271000  |
| 6             | -0.304735000 | -2.301487000 | -3.415577000 | 1           | -4.714066000 | 6.001600000  | 0.115296000  |
| 6             | -0.574392000 | -3.403119000 | -0.869898000 | 29          | 1.652208000  | 1.251513000  | -0.318070000 |
| 1             | 0.833703000  | -1.887061000 | -0.232128000 | 15          | 3.589774000  | 0.382160000  | 0.302710000  |
| 6             | -1.139870000 | -3.398077000 | -3.213753000 | 6           | 4.862111000  | 0.387539000  | -0.986963000 |
| 1             | -0.192917000 | -1.868903000 | -4.415475000 | 6           | 4.335698000  | 1.091433000  | 1.794637000  |
| 6             | -1.272794000 | -3.951723000 | -1.944026000 | 6           | 5.133897000  | 0.327524000  | 2.656547000  |
| 1             | -0.662746000 | -3.849461000 | 0.126308000  | 1           | 5.278950000  | -0.742901000 | 2.469522000  |
| 1             | -1.689514000 | -3.826021000 | -4.056927000 | 6           | 5.729490000  | 0.926007000  | 3.761387000  |
| 1             | -1.921205000 | -4.818702000 | -1.789603000 | 1           | 6.350033000  | 0.328556000  | 4.434303000  |
| 6             | 1.319244000  | -0.574759000 | -2.563451000 | 6           | 5.533793000  | 2.282695000  | 4.011954000  |
| 1             | 1.559685000  | -0.457724000 | -3.632978000 | 1           | 6.002674000  | 2.748393000  | 4.882834000  |
| 1             | 2.264470000  | -0.725718000 | -2.013344000 | 6           | 4.736160000  | 3.044966000  | 3.162375000  |
| 15            | -2.635148000 | -0.712594000 | 0.657667000  | 1           | 4.576483000  | 4.107048000  | 3.364674000  |
| 6             | -2.728000000 | -1.947817000 | 1.975032000  | 6           | 4.134019000  | 2.451558000  | 2.058197000  |
| 6             | -1.549872000 | -2.564366000 | 2.411727000  | 1           | 3.495771000  | 3.044903000  | 1.392655000  |
| 6             | -3.949646000 | -2.282510000 | 2.575591000  | 6           | 2.526326000  | -1.640336000 | 1.856125000  |
| 6             | -1.595445000 | -3.525909000 | 3.416357000  | 6           | 3.284485000  | -1.365070000 | 0.706563000  |
| 1             | -0.591892000 | -2.274566000 | 1.957194000  | 1           | 2.253344000  | -0.824625000 | 2.538450000  |
| 6             | -3.989451000 | -3.242623000 | 3.580220000  | 1           | 1.568423000  | -3.156141000 | 3.047472000  |
| 1             | -4.869784000 | -1.777380000 | 2.257750000  | 6           | 2.135877000  | -2.945394000 | 2.135943000  |
| 6             | -2.814580000 | -3.866782000 | 3.996779000  | 6           | 2.477663000  | -3.981539000 | 1.265986000  |
| 1             | -0.675427000 | -4.008336000 | 3.758424000  | 1           | 2.167670000  | -5.006609000 | 1.485976000  |
| 1             | -4.942919000 | -3.503222000 | 4.046940000  | 6           | 3.224206000  | -3.711194000 | 0.123230000  |
| 1             | -2.849422000 | -4.618359000 | 4.789950000  | 1           | 3.495759000  | -4.521531000 | -0.558115000 |
| 6             | -3.363429000 | -1.404915000 | -0.852820000 | 6           | 3.631819000  | -2.408032000 | -0.157976000 |
| 6             | -3.071413000 | -0.748832000 | -2.056354000 | 1           | 4.217187000  | -2.202738000 | -1.061424000 |
| 6             | -4.217688000 | -2.512091000 | -0.856220000 | 6           | 4.570613000  | 0.941640000  | -2.238492000 |
| 6             | -3.656571000 | -1.174539000 | -3.244109000 | 1           | 3.577887000  | 1.372837000  | -2.424981000 |
| 1             | -2.386040000 | 0.111391000  | -2.066212000 | 6           | 6.133195000  | -0.148975000 | -0.742019000 |
| 6             | -4.781972000 | -2.946754000 | -2.051985000 | 1           | 6.368177000  | -0.576605000 | 0.240077000  |
| 1             | -4.437552000 | -3.044801000 | 0.074491000  | 6           | 7.095754000  | -0.135419000 | -1.743222000 |
| 6             | -4.510235000 | -2.274899000 | -3.241927000 | 1           | 8.087696000  | -0.552507000 | -1.551417000 |
| 1             | -3.431155000 | -0.649872000 | -4.176474000 | 6           | 6.798452000  | 0.416210000  | -2.989778000 |
| 1             | -5.447012000 | -3.814571000 | -2.052835000 | 1           | 7.560742000  | 0.429790000  | -3.773349000 |
| 1             | -4.965462000 | -2.614929000 | -4.176184000 | 6           | 5.539538000  | 0.954217000  | -3.238382000 |
| 6             | -3.775808000 | 0.615976000  | 1.169100000  | 1           | 5.311398000  | 1.391987000  | -4.213439000 |
| 6             | -4.677347000 | 1.209689000  | 0.278324000  | <b>P-L4</b> |              |              |              |
| 6             | -3.680495000 | 1.098050000  | 2.482390000  | 29          | -0.719435000 | -0.168144000 | -0.540153000 |
| 6             | -5.492421000 | 2.252949000  | 0.709797000  | 6           | -0.894415000 | 1.521340000  | -2.516073000 |
| 1             | -4.759268000 | 0.849976000  | -0.752141000 | 6           | -0.132351000 | 0.334437000  | -2.424733000 |
| 6             | -4.504190000 | 2.133927000  | 2.906898000  | 7           | -1.746418000 | 1.433510000  | -3.564194000 |
| 1             | -2.970068000 | 0.642417000  | 3.182638000  | 7           | -0.647279000 | -0.375865000 | -3.487903000 |
| 6             | -5.415828000 | 2.707663000  | 2.022647000  | 7           | -1.579171000 | 0.290218000  | -4.150174000 |

|    |              |              |              |              |              |              |              |
|----|--------------|--------------|--------------|--------------|--------------|--------------|--------------|
| 6  | 0.070986000  | -2.504395000 | -2.686692000 | 1            | -2.796810000 | 5.373455000  | -0.763676000 |
| 6  | 1.392756000  | -2.692228000 | -2.270649000 | 1            | 1.043059000  | 4.141069000  | 0.784814000  |
| 6  | -0.974739000 | -2.885333000 | -1.841050000 | 1            | -0.873445000 | 5.763592000  | 0.760960000  |
| 6  | 1.668939000  | -3.211446000 | -1.001121000 | 29           | 1.509743000  | -0.145497000 | -1.512226000 |
| 1  | 2.211233000  | -2.434097000 | -2.956339000 | 15           | 3.027820000  | 0.033543000  | 0.077831000  |
| 6  | -0.701354000 | -3.405875000 | -0.580388000 | 6            | 4.583618000  | -0.893696000 | 0.004576000  |
| 1  | -2.012607000 | -2.740471000 | -2.169942000 | 6            | 3.506250000  | 1.774514000  | 0.330659000  |
| 6  | 0.620388000  | -3.547423000 | -0.149540000 | 6            | 3.799748000  | 2.300789000  | 1.595460000  |
| 1  | 2.707597000  | -3.350646000 | -0.680102000 | 1            | 3.717018000  | 1.671644000  | 2.488948000  |
| 1  | -1.529305000 | -3.693090000 | 0.078255000  | 6            | 4.185174000  | 3.632027000  | 1.721572000  |
| 1  | 0.831800000  | -3.944426000 | 0.848700000  | 1            | 4.413508000  | 4.038693000  | 2.710272000  |
| 6  | -0.247771000 | -1.705331000 | -3.916225000 | 6            | 4.280830000  | 4.444178000  | 0.593275000  |
| 1  | -1.091351000 | -2.120796000 | -4.487847000 | 1            | 4.579970000  | 5.490448000  | 0.698331000  |
| 1  | 0.621299000  | -1.636801000 | -4.592215000 | 6            | 3.990889000  | 3.927481000  | -0.667460000 |
| 15 | -2.490423000 | -0.332820000 | 0.743518000  | 1            | 4.057692000  | 4.564856000  | -1.552637000 |
| 6  | -2.581649000 | -1.360836000 | 2.226567000  | 6            | 3.605450000  | 2.598162000  | -0.798053000 |
| 6  | -1.512575000 | -2.201828000 | 2.547590000  | 1            | 3.357150000  | 2.193810000  | -1.788132000 |
| 6  | -3.743626000 | -1.375169000 | 3.010720000  | 6            | 1.243592000  | 0.426090000  | 2.167926000  |
| 6  | -1.611513000 | -3.068489000 | 3.633004000  | 6            | 2.225845000  | -0.434225000 | 1.644433000  |
| 1  | -0.590973000 | -2.151573000 | 1.950636000  | 1            | 0.977051000  | 1.344493000  | 1.621745000  |
| 6  | -3.834835000 | -2.238680000 | 4.095536000  | 1            | -0.088461000 | 0.833122000  | 3.815602000  |
| 1  | -4.576819000 | -0.705449000 | 2.764827000  | 6            | 0.655510000  | 0.148616000  | 3.396475000  |
| 6  | -2.771933000 | -3.089469000 | 4.401749000  | 6            | 1.021581000  | -0.996649000 | 4.103400000  |
| 1  | -0.772272000 | -3.723535000 | 3.886337000  | 1            | 0.566513000  | -1.204632000 | 5.075818000  |
| 1  | -4.740116000 | -2.251260000 | 4.708036000  | 6            | 1.946282000  | -1.883759000 | 3.561473000  |
| 1  | -2.849122000 | -3.769386000 | 5.254563000  | 1            | 2.226385000  | -2.788099000 | 4.109043000  |
| 6  | -3.604013000 | -1.104997000 | -0.468440000 | 6            | 2.548075000  | -1.607677000 | 2.333465000  |
| 6  | -3.737233000 | -0.433149000 | -1.694733000 | 1            | 3.299955000  | -2.294306000 | 1.927842000  |
| 6  | -4.137253000 | -2.387937000 | -0.318756000 | 6            | 4.902819000  | -1.627196000 | -1.142359000 |
| 6  | -4.376154000 | -1.045153000 | -2.765237000 | 1            | 4.194758000  | -1.654611000 | -1.979544000 |
| 1  | -3.334793000 | 0.583558000  | -1.804386000 | 6            | 5.497644000  | -0.834840000 | 1.065715000  |
| 6  | -4.786155000 | -2.994625000 | -1.394852000 | 1            | 5.257791000  | -0.251052000 | 1.962917000  |
| 1  | -4.039393000 | -2.921252000 | 0.633597000  | 6            | 6.705186000  | -1.515633000 | 0.980540000  |
| 6  | -4.894788000 | -2.333414000 | -2.615821000 | 1            | 7.416555000  | -1.469066000 | 1.809094000  |
| 1  | -4.458910000 | -0.514804000 | -3.718346000 | 6            | 7.012969000  | -2.251451000 | -0.164130000 |
| 1  | -5.206954000 | -3.996865000 | -1.277071000 | 1            | 7.966312000  | -2.782594000 | -0.228770000 |
| 1  | -5.394666000 | -2.821493000 | -3.456816000 | 6            | 6.115353000  | -2.306361000 | -1.225925000 |
| 6  | -3.208111000 | 1.277374000  | 1.162656000  | 1            | 6.362167000  | -2.876121000 | -2.125298000 |
| 6  | -4.519865000 | 1.641503000  | 0.839280000  | <b>Ac-L5</b> |              |              |              |
| 6  | -2.390646000 | 2.172187000  | 1.865240000  | 29           | 0.564121000  | -1.158880000 | 0.027308000  |
| 6  | -5.005934000 | 2.886916000  | 1.229216000  | 6            | 3.379572000  | -0.124198000 | 0.057540000  |
| 1  | -5.162739000 | 0.952315000  | 0.281462000  | 6            | 2.138702000  | -0.087610000 | 0.033282000  |
| 6  | -2.891612000 | 3.400566000  | 2.275092000  | 15           | -1.137683000 | -2.498665000 | -0.025870000 |
| 1  | -1.349182000 | 1.898280000  | 2.079408000  | 8            | -2.264859000 | -2.272110000 | 1.072428000  |
| 6  | -4.199340000 | 3.759562000  | 1.954473000  | 8            | -0.851063000 | -4.062962000 | 0.192252000  |
| 1  | -6.029351000 | 3.172693000  | 0.972239000  | 8            | -1.828771000 | -2.398506000 | -1.460036000 |
| 1  | -2.251150000 | 4.093230000  | 2.827821000  | 6            | 4.792110000  | -0.167886000 | 0.080380000  |
| 1  | -4.591034000 | 4.731357000  | 2.266871000  | 6            | 5.520820000  | -0.195947000 | -1.125196000 |
| 6  | -0.906983000 | 2.666603000  | -1.606134000 | 6            | 5.485135000  | -0.183132000 | 1.307004000  |
| 6  | -1.979723000 | 3.568791000  | -1.603180000 | 6            | 6.906101000  | -0.237853000 | -1.098050000 |
| 6  | 0.159123000  | 2.884853000  | -0.722464000 | 1            | 4.979626000  | -0.182636000 | -2.074581000 |
| 6  | -1.960728000 | 4.668352000  | -0.751210000 | 6            | 6.870684000  | -0.226168000 | 1.320623000  |
| 1  | -2.811100000 | 3.406253000  | -2.296039000 | 1            | 4.916651000  | -0.160084000 | 2.240093000  |
| 6  | 0.177319000  | 3.982348000  | 0.128811000  | 6            | 7.581710000  | -0.253299000 | 0.121570000  |
| 1  | 1.014295000  | 2.203343000  | -0.742968000 | 1            | 7.467803000  | -0.258168000 | -2.035244000 |
| 6  | -0.884592000 | 4.885559000  | 0.109100000  | 1            | 7.404711000  | -0.237589000 | 2.274011000  |

|              |              |              |              |    |              |              |              |
|--------------|--------------|--------------|--------------|----|--------------|--------------|--------------|
| 1            | 8.674362000  | -0.286186000 | 0.137819000  | 1  | -1.522535000 | -1.422931000 | -3.363508000 |
| 6            | 0.096917000  | -4.726130000 | -0.650209000 | 1  | -2.075281000 | -3.059876000 | -2.946293000 |
| 1            | -0.337319000 | -4.818294000 | -1.662975000 | 6  | -3.241531000 | -1.475955000 | -2.077544000 |
| 1            | 1.002170000  | -4.093944000 | -0.739690000 | 6  | -3.892871000 | -0.500606000 | -2.834132000 |
| 6            | -2.930487000 | -3.216092000 | -1.867964000 | 6  | -3.849456000 | -1.963693000 | -0.918469000 |
| 1            | -2.790559000 | -3.389444000 | -2.945080000 | 6  | -5.142849000 | -0.028234000 | -2.446420000 |
| 1            | -2.861430000 | -4.199446000 | -1.366186000 | 6  | -5.093125000 | -1.483034000 | -0.524507000 |
| 6            | -3.029807000 | -3.313348000 | 1.701010000  | 6  | -5.744561000 | -0.520286000 | -1.291209000 |
| 1            | -3.427555000 | -3.994212000 | 0.926733000  | 1  | -3.419997000 | -0.118777000 | -3.745921000 |
| 1            | -2.352039000 | -3.908170000 | 2.333644000  | 1  | -3.341163000 | -2.736103000 | -0.327516000 |
| 6            | 0.414304000  | -6.064995000 | -0.053732000 | 1  | -5.654235000 | 0.722319000  | -3.055431000 |
| 1            | 0.855230000  | -5.954191000 | 0.945903000  | 1  | -5.561554000 | -1.865220000 | 0.386736000  |
| 1            | -0.492846000 | -6.677812000 | 0.036239000  | 1  | -6.732333000 | -0.158905000 | -0.991616000 |
| 1            | 1.129364000  | -6.604629000 | -0.687678000 | 6  | 3.471453000  | -2.205443000 | 0.976144000  |
| 6            | -4.241507000 | -2.531954000 | -1.588002000 | 6  | 3.951820000  | -3.287576000 | 0.217194000  |
| 1            | -4.409543000 | -2.402067000 | -0.508184000 | 6  | 4.386650000  | -1.332954000 | 1.594363000  |
| 1            | -4.268837000 | -1.540984000 | -2.063693000 | 6  | 5.319146000  | -3.480113000 | 0.077682000  |
| 1            | -5.076385000 | -3.122047000 | -1.989851000 | 6  | 5.751587000  | -1.532224000 | 1.441929000  |
| 6            | -4.126617000 | -2.670790000 | 2.495975000  | 6  | 6.219639000  | -2.602968000 | 0.681701000  |
| 1            | -4.822302000 | -2.115640000 | 1.849484000  | 1  | 3.238712000  | -3.961801000 | -0.264790000 |
| 1            | -4.702683000 | -3.436250000 | 3.032543000  | 1  | 4.004654000  | -0.496108000 | 2.188653000  |
| 1            | -3.714429000 | -1.972384000 | 3.237715000  | 1  | 5.689478000  | -4.322693000 | -0.511919000 |
| 29           | 0.830778000  | 1.302267000  | -0.054666000 | 1  | 6.457658000  | -0.850391000 | 1.922463000  |
| 15           | -0.778861000 | 2.746223000  | -0.104193000 | 1  | 7.295127000  | -2.759501000 | 0.564311000  |
| 8            | -0.586780000 | 4.039126000  | 0.789215000  | 1  | -4.571039000 | 2.196817000  | 2.024813000  |
| 8            | -2.199408000 | 2.234794000  | 0.454003000  | 6  | -4.993112000 | 2.262279000  | 1.012396000  |
| 8            | -1.068410000 | 3.193984000  | -1.603998000 | 1  | -5.618330000 | 1.373412000  | 0.843792000  |
| 6            | -2.810476000 | 1.088379000  | -0.130762000 | 1  | -5.633506000 | 3.153915000  | 0.967110000  |
| 1            | -3.209159000 | 1.365312000  | -1.124595000 | 6  | -3.913097000 | 2.364476000  | -0.029872000 |
| 1            | -2.039019000 | 0.306251000  | -0.302177000 | 8  | -3.133226000 | 1.172401000  | -0.166586000 |
| 6            | -2.082220000 | 4.139015000  | -1.964315000 | 1  | -4.333667000 | 2.526257000  | -1.034243000 |
| 1            | -2.464001000 | 3.810012000  | -2.942153000 | 1  | -3.226492000 | 3.202215000  | 0.187366000  |
| 1            | -2.920210000 | 4.063063000  | -1.245688000 | 8  | -1.947933000 | 1.609599000  | 1.996663000  |
| 6            | -1.615573000 | 4.770403000  | 1.471388000  | 6  | -0.630603000 | 1.901163000  | 2.440920000  |
| 1            | -2.431718000 | 5.002986000  | 0.763583000  | 1  | 0.071334000  | 1.886103000  | 1.583315000  |
| 1            | -2.040610000 | 4.123283000  | 2.255231000  | 1  | -0.664546000 | 2.942434000  | 2.793394000  |
| 6            | -3.885920000 | 0.596798000  | 0.790785000  | 6  | -0.166430000 | 0.965611000  | 3.523891000  |
| 1            | -3.460508000 | 0.282935000  | 1.754249000  | 1  | 0.836813000  | 1.252511000  | 3.870202000  |
| 1            | -4.631028000 | 1.383072000  | 0.975860000  | 1  | -0.843260000 | 0.997635000  | 4.390520000  |
| 1            | -4.399425000 | -0.265281000 | 0.344652000  | 1  | -0.106509000 | -0.074650000 | 3.158982000  |
| 6            | -1.513912000 | 5.530893000  | -2.035079000 | 15 | -2.375469000 | 0.413001000  | 0.998581000  |
| 1            | -1.125651000 | 5.860762000  | -1.060273000 | 8  | -3.587476000 | -0.242472000 | 1.826533000  |
| 1            | -0.687281000 | 5.573055000  | -2.757211000 | 6  | -3.298353000 | -1.040152000 | 2.969624000  |
| 1            | -2.284877000 | 6.243627000  | -2.357388000 | 1  | -4.164764000 | -0.933391000 | 3.638497000  |
| 6            | -0.996086000 | 6.014893000  | 2.034169000  | 1  | -2.428303000 | -0.617985000 | 3.506931000  |
| 1            | -0.586183000 | 6.650702000  | 1.236666000  | 6  | -3.069690000 | -2.480887000 | 2.592649000  |
| 1            | -1.746096000 | 6.596872000  | 2.585382000  | 1  | -3.935738000 | -2.886487000 | 2.049059000  |
| 1            | -0.178498000 | 5.765424000  | 2.723740000  | 1  | -2.912443000 | -3.097332000 | 3.488458000  |
| <b>RC-L5</b> |              |              |              | 1  | -2.172463000 | -2.598889000 | 1.957381000  |
| 7            | -0.969519000 | -2.098824000 | -1.426692000 | 29 | 1.516188000  | 0.065238000  | 0.421607000  |
| 7            | 0.109452000  | -2.640270000 | -1.704197000 | 15 | 2.214920000  | 1.930782000  | -0.416336000 |
| 7            | 1.137925000  | -3.081231000 | -1.822440000 | 8  | 3.563547000  | 1.852791000  | -1.263877000 |
| 6            | 0.842994000  | -1.706241000 | 0.982319000  | 8  | 2.536658000  | 3.047545000  | 0.653863000  |
| 6            | 2.075643000  | -1.921794000 | 1.023877000  | 8  | 1.213993000  | 2.624428000  | -1.473695000 |
| 29           | -0.849345000 | -1.021368000 | 0.410950000  | 6  | -0.165901000 | 2.271038000  | -1.502691000 |
| 6            | -1.936373000 | -2.039071000 | -2.544300000 | 1  | -0.705294000 | 3.158369000  | -1.864401000 |



|               |              |              |              |              |              |              |              |
|---------------|--------------|--------------|--------------|--------------|--------------|--------------|--------------|
| 6             | -0.400738000 | 1.072133000  | -2.381439000 | 8            | -0.669688000 | 2.883689000  | 0.966318000  |
| 1             | -0.189560000 | 1.298050000  | -3.437327000 | 1            | -0.553609000 | 4.860589000  | 1.294969000  |
| 1             | -1.446436000 | 0.734021000  | -2.281629000 | 1            | 0.095959000  | 3.856424000  | 2.616364000  |
| 1             | 0.260631000  | 0.239277000  | -2.071218000 | 8            | -0.436368000 | 1.145939000  | 2.758280000  |
| 1             | -0.528648000 | 2.074304000  | -0.474259000 | 6            | 0.503822000  | 0.165062000  | 3.173313000  |
| 6             | 3.674661000  | 1.006569000  | -2.409228000 | 1            | 1.287788000  | 0.036509000  | 2.399442000  |
| 6             | 3.843020000  | -0.447452000 | -2.041659000 | 1            | 0.997885000  | 0.584700000  | 4.061829000  |
| 1             | 4.107219000  | -1.033516000 | -2.932967000 | 6            | -0.152152000 | -1.154929000 | 3.472401000  |
| 1             | 2.918183000  | -0.891258000 | -1.630210000 | 1            | 0.570490000  | -1.851173000 | 3.920647000  |
| 1             | 4.645477000  | -0.578125000 | -1.297110000 | 1            | -0.987995000 | -1.028986000 | 4.175806000  |
| 1             | 4.551751000  | 1.382279000  | -2.954464000 | 1            | -0.532786000 | -1.621009000 | 2.547750000  |
| 1             | 2.794946000  | 1.169216000  | -3.060347000 | 15           | -0.978245000 | 1.363426000  | 1.254469000  |
| 1             | 1.576618000  | 4.804010000  | 0.153370000  | 8            | -2.569470000 | 1.333486000  | 1.469895000  |
| 6             | 2.597188000  | 4.459323000  | 0.391738000  | 6            | -3.217323000 | 0.072370000  | 1.641356000  |
| 1             | 2.881339000  | 4.901098000  | 1.356576000  | 1            | -3.906179000 | 0.188095000  | 2.491695000  |
| 1             | 4.563908000  | 4.408005000  | -0.498252000 | 1            | -2.476604000 | -0.700533000 | 1.934995000  |
| 6             | 3.566742000  | 4.823694000  | -0.698230000 | 6            | -3.941048000 | -0.338186000 | 0.387976000  |
| 1             | 3.228987000  | 4.457952000  | -1.678066000 | 1            | -4.643113000 | 0.445407000  | 0.065905000  |
| 1             | 3.654389000  | 5.917091000  | -0.758563000 | 1            | -4.508428000 | -1.267775000 | 0.553928000  |
| <b>TS1-L5</b> |              |              |              | 1            | -3.230712000 | -0.528627000 | -0.437128000 |
| 7             | -0.728501000 | 0.055827000  | -2.208049000 | 29           | 1.585901000  | -1.494652000 | 0.072328000  |
| 7             | -1.182137000 | -0.995889000 | -2.768097000 | 15           | 3.629465000  | -0.741812000 | 0.168772000  |
| 7             | -1.400582000 | -2.119966000 | -2.463840000 | 8            | 4.507339000  | -1.165557000 | -1.096645000 |
| 6             | -0.181694000 | -2.017559000 | -0.267390000 | 8            | 4.474494000  | -1.290011000 | 1.376779000  |
| 6             | -1.270285000 | -2.549556000 | -0.678885000 | 8            | 3.824362000  | 0.853220000  | 0.207427000  |
| 29            | -0.418169000 | -0.081110000 | -0.272168000 | 6            | 2.737785000  | 1.772200000  | 0.273679000  |
| 6             | -0.719593000 | 1.275546000  | -3.012810000 | 1            | 3.157587000  | 2.706428000  | 0.671972000  |
| 1             | 0.323350000  | 1.542825000  | -3.264387000 | 6            | 2.097858000  | 1.965605000  | -1.072483000 |
| 1             | -1.229188000 | 1.072537000  | -3.970017000 | 1            | 2.785898000  | 2.442540000  | -1.787223000 |
| 6             | -1.372181000 | 2.427866000  | -2.295418000 | 1            | 1.192244000  | 2.586632000  | -0.975597000 |
| 6             | -0.786190000 | 3.695486000  | -2.297910000 | 1            | 1.788731000  | 0.988217000  | -1.490390000 |
| 6             | -2.600337000 | 2.254426000  | -1.654032000 | 1            | 1.988173000  | 1.418029000  | 1.007520000  |
| 6             | -1.412139000 | 4.766596000  | -1.667552000 | 6            | 4.196002000  | -0.719950000 | -2.414855000 |
| 6             | -3.223508000 | 3.319190000  | -1.012843000 | 6            | 2.959690000  | -1.377944000 | -2.979495000 |
| 6             | -2.630763000 | 4.579305000  | -1.019352000 | 1            | 2.873929000  | -1.159543000 | -4.053158000 |
| 1             | 0.170456000  | 3.845392000  | -2.811351000 | 1            | 2.023130000  | -1.026288000 | -2.507410000 |
| 1             | -3.076339000 | 1.269570000  | -1.671561000 | 1            | 3.010881000  | -2.470696000 | -2.863519000 |
| 1             | -0.948513000 | 5.756817000  | -1.689043000 | 1            | 5.080845000  | -0.971830000 | -3.015704000 |
| 1             | -4.182967000 | 3.164984000  | -0.509801000 | 1            | 4.111490000  | 0.382820000  | -2.408379000 |
| 1             | -3.126047000 | 5.422124000  | -0.528190000 | 1            | 5.416082000  | 0.259454000  | 2.359882000  |
| 6             | -2.454890000 | -3.277492000 | -0.306921000 | 6            | 5.682075000  | -0.704228000 | 1.894120000  |
| 6             | -3.480514000 | -3.599989000 | -1.207658000 | 1            | 5.991771000  | -1.389631000 | 2.694450000  |
| 6             | -2.607022000 | -3.605036000 | 1.055377000  | 1            | 6.955407000  | -1.484258000 | 0.334512000  |
| 6             | -4.637883000 | -4.215310000 | -0.746057000 | 6            | 6.752466000  | -0.536540000 | 0.851942000  |
| 6             | -3.765702000 | -4.217288000 | 1.505100000  | 1            | 6.471504000  | 0.216016000  | 0.101560000  |
| 6             | -4.789284000 | -4.517594000 | 0.605136000  | 1            | 7.681065000  | -0.200397000 | 1.333015000  |
| 1             | -3.368109000 | -3.363579000 | -2.266732000 | <b>IC-L5</b> |              |              |              |
| 1             | -1.794395000 | -3.369310000 | 1.750319000  | 7            | 0.289426000  | 0.978676000  | -1.909033000 |
| 1             | -5.433705000 | -4.463594000 | -1.452852000 | 7            | -0.456838000 | 1.852534000  | -2.482462000 |
| 1             | -3.873615000 | -4.468414000 | 2.563407000  | 7            | -1.347543000 | 2.528444000  | -1.930769000 |
| 1             | -5.704620000 | -4.999117000 | 0.959119000  | 6            | -1.083695000 | 1.412648000  | 0.150956000  |
| 1             | -2.206447000 | 3.187385000  | 3.294535000  | 6            | -1.689159000 | 2.376473000  | -0.564741000 |
| 6             | -2.061735000 | 4.043201000  | 2.620099000  | 29           | 0.631907000  | 0.726439000  | 0.020536000  |
| 1             | -2.896195000 | 4.060199000  | 1.903511000  | 6            | 1.169339000  | 0.266000000  | -2.834994000 |
| 1             | -2.099863000 | 4.960602000  | 3.223371000  | 1            | 0.783654000  | -0.761320000 | -2.975767000 |
| 6             | -0.741218000 | 3.964317000  | 1.905186000  | 1            | 1.088910000  | 0.764406000  | -3.816617000 |

|    |              |              |              |               |              |              |              |
|----|--------------|--------------|--------------|---------------|--------------|--------------|--------------|
| 6  | 2.602853000  | 0.201483000  | -2.390895000 | 1             | 1.857304000  | -2.973233000 | -0.647042000 |
| 6  | 3.354107000  | -0.951104000 | -2.629027000 | 1             | 0.575622000  | -1.751263000 | -0.785880000 |
| 6  | 3.229052000  | 1.313580000  | -1.818308000 | 1             | -0.061034000 | -3.527233000 | 0.916319000  |
| 6  | 4.709776000  | -0.988702000 | -2.318157000 | 6             | -3.367321000 | -2.129603000 | -2.358693000 |
| 6  | 4.578637000  | 1.268617000  | -1.482991000 | 6             | -2.374319000 | -1.030472000 | -2.650433000 |
| 6  | 5.323517000  | 0.119854000  | -1.739902000 | 1             | -2.297758000 | -0.866751000 | -3.734795000 |
| 1  | 2.871731000  | -1.822033000 | -3.087803000 | 1             | -1.363129000 | -1.293014000 | -2.288049000 |
| 1  | 2.649694000  | 2.230041000  | -1.652678000 | 1             | -2.673540000 | -0.071868000 | -2.190567000 |
| 1  | 5.293525000  | -1.888149000 | -2.533991000 | 1             | -4.355525000 | -1.900095000 | -2.779842000 |
| 1  | 5.057542000  | 2.143077000  | -1.032814000 | 1             | -3.031178000 | -3.088986000 | -2.787495000 |
| 1  | 6.390634000  | 0.094011000  | -1.500980000 | 1             | -2.492151000 | -5.057042000 | 1.512568000  |
| 6  | -2.702099000 | 3.319253000  | -0.083328000 | 6             | -3.421870000 | -4.463008000 | 1.474222000  |
| 6  | -3.228223000 | 4.299652000  | -0.933813000 | 1             | -3.901768000 | -4.538363000 | 2.459337000  |
| 6  | -3.149787000 | 3.240465000  | 1.244788000  | 1             | -5.214890000 | -4.286255000 | 0.283395000  |
| 6  | -4.192437000 | 5.179996000  | -0.457653000 | 6             | -4.330227000 | -4.931598000 | 0.371555000  |
| 6  | -4.110987000 | 4.121725000  | 1.712403000  | 1             | -3.815002000 | -4.950347000 | -0.599263000 |
| 6  | -4.635006000 | 5.094658000  | 0.859939000  | 1             | -4.669983000 | -5.952923000 | 0.591107000  |
| 1  | -2.872380000 | 4.359833000  | -1.964662000 | <b>TS2-L5</b> |              |              |              |
| 1  | -2.730719000 | 2.474480000  | 1.906926000  | 7             | 0.233481000  | 1.149756000  | -1.901583000 |
| 1  | -4.602712000 | 5.943785000  | -1.123147000 | 7             | -0.360879000 | 2.145321000  | -2.458060000 |
| 1  | -4.457899000 | 4.054595000  | 2.746528000  | 7             | -1.238622000 | 2.833679000  | -1.891122000 |
| 1  | -5.393225000 | 5.790832000  | 1.228149000  | 6             | -1.143084000 | 1.411915000  | 0.020755000  |
| 1  | 4.968594000  | -0.360683000 | 2.743712000  | 6             | -1.671171000 | 2.486249000  | -0.599410000 |
| 6  | 5.411374000  | -0.850624000 | 1.865403000  | 29            | 0.624505000  | 0.830257000  | 0.051274000  |
| 1  | 5.788031000  | -0.068190000 | 1.190087000  | 6             | 1.101613000  | 0.398414000  | -2.806389000 |
| 1  | 6.260965000  | -1.457933000 | 2.206309000  | 1             | 0.695131000  | -0.622443000 | -2.926557000 |
| 6  | 4.414390000  | -1.728112000 | 1.160413000  | 1             | 1.030648000  | 0.879405000  | -3.797638000 |
| 8  | 3.374667000  | -0.993655000 | 0.503993000  | 6             | 2.535540000  | 0.315014000  | -2.362289000 |
| 1  | 4.883278000  | -2.306958000 | 0.349949000  | 6             | 3.280734000  | -0.834968000 | -2.630949000 |
| 1  | 3.944143000  | -2.444341000 | 1.856883000  | 6             | 3.166476000  | 1.405948000  | -1.755196000 |
| 8  | 2.097121000  | -0.487058000 | 2.630724000  | 6             | 4.633014000  | -0.893384000 | -2.309580000 |
| 6  | 0.878152000  | -1.169898000 | 2.885794000  | 6             | 4.513379000  | 1.339826000  | -1.410654000 |
| 1  | 0.462099000  | -1.558518000 | 1.928947000  | 6             | 5.250410000  | 0.191974000  | -1.691870000 |
| 1  | 1.123120000  | -2.047894000 | 3.503118000  | 1             | 2.795976000  | -1.686881000 | -3.121628000 |
| 6  | -0.106847000 | -0.258827000 | 3.566409000  | 1             | 2.594362000  | 2.323975000  | -1.571558000 |
| 1  | -1.061838000 | -0.775298000 | 3.745279000  | 1             | 5.212112000  | -1.789854000 | -2.549265000 |
| 1  | 0.283044000  | 0.085526000  | 4.534725000  | 1             | 4.997364000  | 2.197701000  | -0.934760000 |
| 1  | -0.307347000 | 0.630708000  | 2.944637000  | 1             | 6.315044000  | 0.150316000  | -1.444756000 |
| 15 | 2.420041000  | 0.079111000  | 1.151618000  | 6             | -2.697744000 | 3.369247000  | -0.034335000 |
| 8  | 3.390492000  | 1.294429000  | 1.523333000  | 6             | -3.088835000 | 4.526562000  | -0.719640000 |
| 6  | 2.814348000  | 2.469334000  | 2.097217000  | 6             | -3.296376000 | 3.057971000  | 1.196464000  |
| 1  | 3.554025000  | 2.847802000  | 2.817345000  | 6             | -4.066570000 | 5.352323000  | -0.177833000 |
| 1  | 1.913826000  | 2.191733000  | 2.680747000  | 6             | -4.270715000 | 3.886133000  | 1.730214000  |
| 6  | 2.497266000  | 3.488540000  | 1.035711000  | 6             | -4.658018000 | 5.037086000  | 1.042740000  |
| 1  | 3.385331000  | 3.701535000  | 0.422749000  | 1             | -2.618278000 | 4.765226000  | -1.675844000 |
| 1  | 2.161156000  | 4.430561000  | 1.490166000  | 1             | -2.991658000 | 2.149219000  | 1.727564000  |
| 1  | 1.689076000  | 3.142888000  | 0.367231000  | 1             | -4.370598000 | 6.254080000  | -0.715453000 |
| 29 | -1.582034000 | -0.395483000 | 0.426033000  | 1             | -4.736965000 | 3.635626000  | 2.686329000  |
| 15 | -2.409814000 | -2.389126000 | 0.102947000  | 1             | -5.427433000 | 5.690293000  | 1.462778000  |
| 8  | -3.593949000 | -2.323963000 | -0.961233000 | 1             | 4.881243000  | -0.598274000 | 2.746389000  |
| 8  | -3.051003000 | -3.076560000 | 1.367623000  | 6             | 5.280824000  | -1.081715000 | 1.844052000  |
| 8  | -1.478326000 | -3.498365000 | -0.602061000 | 1             | 5.718800000  | -0.302571000 | 1.202783000  |
| 6  | -0.134014000 | -3.702820000 | -0.174653000 | 1             | 6.078753000  | -1.771286000 | 2.151462000  |
| 1  | 0.079417000  | -4.769574000 | -0.337769000 | 6             | 4.212561000  | -1.838620000 | 1.104298000  |
| 6  | 0.810515000  | -2.821818000 | -0.949037000 | 8             | 3.238621000  | -0.989748000 | 0.489948000  |
| 1  | 0.726286000  | -3.025416000 | -2.028326000 | 1             | 4.630233000  | -2.416348000 | 0.264819000  |

|             |              |              |              |    |              |              |              |
|-------------|--------------|--------------|--------------|----|--------------|--------------|--------------|
| 1           | 3.685301000  | -2.546814000 | 1.769146000  | 6  | -2.395458000 | -0.125428000 | -2.561937000 |
| 8           | 1.998915000  | -0.493310000 | 2.644248000  | 6  | -2.392791000 | 2.646376000  | -2.846504000 |
| 6           | 0.859148000  | -1.337277000 | 2.747671000  | 6  | -3.549428000 | 0.610009000  | -2.281912000 |
| 1           | 0.566011000  | -1.687879000 | 1.732003000  | 6  | -3.550203000 | 1.993651000  | -2.432817000 |
| 1           | 1.166986000  | -2.230955000 | 3.313407000  | 1  | -0.326036000 | 2.438361000  | -3.443313000 |
| 6           | -0.283793000 | -0.617554000 | 3.410563000  | 1  | -2.419268000 | -1.221700000 | -2.501282000 |
| 1           | -1.179396000 | -1.256855000 | 3.443200000  | 1  | -2.389115000 | 3.733576000  | -2.957275000 |
| 1           | -0.025710000 | -0.330517000 | 4.439504000  | 1  | -4.455946000 | 0.088807000  | -1.961446000 |
| 1           | -0.535801000 | 0.303252000  | 2.857120000  | 1  | -4.453406000 | 2.567213000  | -2.213063000 |
| 15          | 2.367835000  | 0.119837000  | 1.194692000  | 6  | -0.737216000 | -3.453050000 | 0.378153000  |
| 8           | 3.416467000  | 1.240212000  | 1.630855000  | 6  | -1.561908000 | -4.586031000 | 0.385793000  |
| 6           | 2.937404000  | 2.444260000  | 2.235564000  | 6  | -0.295268000 | -2.928785000 | 1.597924000  |
| 1           | 3.749407000  | 2.789201000  | 2.891152000  | 6  | -1.964377000 | -5.147499000 | 1.592187000  |
| 1           | 2.076079000  | 2.208904000  | 2.888915000  | 6  | -0.707126000 | -3.482635000 | 2.803661000  |
| 6           | 2.589529000  | 3.475627000  | 1.194977000  | 6  | -1.555056000 | -4.589963000 | 2.802837000  |
| 1           | 3.440994000  | 3.653951000  | 0.522011000  | 1  | -1.888685000 | -5.005850000 | -0.569610000 |
| 1           | 2.323183000  | 4.430030000  | 1.669361000  | 1  | 0.420496000  | -2.097539000 | 1.592630000  |
| 1           | 1.723986000  | 3.165434000  | 0.582651000  | 1  | -2.609258000 | -6.030314000 | 1.589510000  |
| 29          | -1.551845000 | -0.411731000 | 0.285143000  | 1  | -0.346127000 | -3.067840000 | 3.749244000  |
| 15          | -2.318321000 | -2.436248000 | 0.041143000  | 1  | -1.876885000 | -5.033945000 | 3.748447000  |
| 8           | -3.562143000 | -2.419863000 | -0.955431000 | 1  | -3.581167000 | 2.983133000  | 3.013669000  |
| 8           | -2.855678000 | -3.128764000 | 1.352264000  | 6  | -4.009789000 | 3.656503000  | 2.258165000  |
| 8           | -1.403696000 | -3.530035000 | -0.708934000 | 1  | -4.901043000 | 3.174269000  | 1.833412000  |
| 6           | -0.050606000 | -3.747710000 | -0.321020000 | 1  | -4.324946000 | 4.578222000  | 2.766127000  |
| 1           | 0.168047000  | -4.798292000 | -0.563193000 | 6  | -3.009038000 | 3.988344000  | 1.185540000  |
| 6           | 0.877241000  | -2.810819000 | -1.049309000 | 8  | -2.663965000 | 2.859419000  | 0.368852000  |
| 1           | 0.751893000  | -2.924131000 | -2.137964000 | 1  | -3.402348000 | 4.727390000  | 0.473848000  |
| 1           | 1.931036000  | -3.005341000 | -0.800871000 | 1  | -2.080236000 | 4.399984000  | 1.615083000  |
| 1           | 0.676385000  | -1.751616000 | -0.789149000 | 8  | -1.234662000 | 1.971488000  | 2.222952000  |
| 1           | 0.039535000  | -3.650479000 | 0.778563000  | 6  | 0.167918000  | 1.827013000  | 2.389965000  |
| 6           | -3.407439000 | -2.232497000 | -2.364371000 | 1  | 0.666188000  | 1.816109000  | 1.395133000  |
| 6           | -2.467723000 | -1.103710000 | -2.716281000 | 1  | 0.513473000  | 2.730373000  | 2.915106000  |
| 1           | -2.444861000 | -0.960342000 | -3.805639000 | 6  | 0.473559000  | 0.573034000  | 3.157917000  |
| 1           | -1.431304000 | -1.321021000 | -2.395307000 | 1  | 1.553699000  | 0.454647000  | 3.316219000  |
| 1           | -2.779504000 | -0.148000000 | -2.260491000 | 1  | -0.030716000 | 0.581929000  | 4.134955000  |
| 1           | -4.421304000 | -2.040341000 | -2.740830000 | 1  | 0.108683000  | -0.306179000 | 2.600654000  |
| 1           | -3.059611000 | -3.184834000 | -2.799311000 | 15 | -2.044900000 | 1.509811000  | 0.910671000  |
| 1           | -2.231180000 | -5.092413000 | 1.464801000  | 8  | -3.325929000 | 0.781345000  | 1.538132000  |
| 6           | -3.178001000 | -4.524764000 | 1.491278000  | 6  | -3.169373000 | -0.541668000 | 2.057830000  |
| 1           | -3.583046000 | -4.607491000 | 2.508929000  | 1  | -3.798004000 | -0.592125000 | 2.958799000  |
| 1           | -5.054239000 | -4.402115000 | 0.429673000  | 1  | -2.123007000 | -0.690901000 | 2.393030000  |
| 6           | -4.149907000 | -5.025216000 | 0.459201000  | 6  | -3.568076000 | -1.576992000 | 1.042038000  |
| 1           | -3.704525000 | -5.039256000 | -0.545484000 | 1  | -4.613586000 | -1.441016000 | 0.730437000  |
| 1           | -4.448046000 | -6.052461000 | 0.709369000  | 1  | -3.454501000 | -2.588925000 | 1.461020000  |
| <b>P-L5</b> |              |              |              | 1  | -2.932485000 | -1.526201000 | 0.137447000  |
| 7           | 0.048489000  | -1.464416000 | -2.504736000 | 29 | 1.308829000  | -0.476662000 | -0.095600000 |
| 7           | -0.301341000 | -2.629540000 | -3.034784000 | 15 | 3.274392000  | 0.328632000  | 0.365069000  |
| 7           | -0.559062000 | -3.445060000 | -2.067821000 | 8  | 4.449389000  | -0.673808000 | -0.019495000 |
| 6           | -0.024688000 | -1.468032000 | -1.125017000 | 8  | 3.582046000  | 0.747084000  | 1.859365000  |
| 6           | -0.410802000 | -2.800684000 | -0.883192000 | 8  | 3.708898000  | 1.600853000  | -0.530021000 |
| 29          | -1.028455000 | 0.151172000  | -0.470801000 | 6  | 2.919815000  | 2.785460000  | -0.524618000 |
| 6           | 0.016371000  | -0.273745000 | -3.314513000 | 1  | 3.604573000  | 3.601899000  | -0.797602000 |
| 1           | 0.924501000  | 0.331632000  | -3.139333000 | 6  | 1.765188000  | 2.696288000  | -1.489825000 |
| 1           | 0.023577000  | -0.597265000 | -4.368120000 | 1  | 2.126374000  | 2.413027000  | -2.491622000 |
| 6           | -1.221631000 | 0.529357000  | -2.981602000 | 1  | 1.249908000  | 3.664096000  | -1.573011000 |
| 6           | -1.233397000 | 1.922157000  | -3.110609000 | 1  | 1.010522000  | 1.952471000  | -1.166456000 |

|   |             |              |              |
|---|-------------|--------------|--------------|
| 1 | 2.569455000 | 2.991430000  | 0.506686000  |
| 6 | 4.826041000 | -0.959492000 | -1.368080000 |
| 6 | 3.644937000 | -1.257442000 | -2.257960000 |
| 1 | 3.988730000 | -1.562056000 | -3.255974000 |
| 1 | 3.008528000 | -0.363170000 | -2.393278000 |
| 1 | 3.024660000 | -2.073659000 | -1.852015000 |
| 1 | 5.502509000 | -1.822192000 | -1.298966000 |
| 1 | 5.407117000 | -0.103082000 | -1.750647000 |
| 1 | 4.486893000 | 2.601586000  | 1.943152000  |
| 6 | 4.685836000 | 1.569796000  | 2.283566000  |
| 1 | 4.616229000 | 1.567290000  | 3.379984000  |
| 1 | 6.188205000 | 0.031911000  | 2.073548000  |
| 6 | 6.029025000 | 1.086662000  | 1.811325000  |
| 1 | 6.142822000 | 1.196624000  | 0.723939000  |
| 1 | 6.815193000 | 1.683408000  | 2.293683000  |
